# Supplementary material for: Kinase Screening in Pichia pastoris Identified Promising Targets Involved in Cell Growth and Alcohol Oxidase 1 Promoter (PAOX1) Regulation
Source: PLoS One. 2016 Dec 9;11(12):e0167766. doi: 10.1371/journal.pone.0167766 (PMC5147967; doi:10.1371/journal.pone.0167766)
Supplement: S2 Table — (XLSX) [file pone.0167766.s003.xlsx]

## Sheet: H-G
prot_description	Sample:H-G
Uncharacterized protein OS=Komagataella pastoris (strain GS115 / ATCC 20864) GN=PAS_chr4_0230 PE=4 SV=1
GDP-mannose pyrophosphorylase (Mannose-1-phosphate guanyltransferase) OS=Komagataella pastoris (strain GS115 / ATCC 20864) GN=PAS_chr3_0870 PE=4 SV=1
Subunit of a heterodimeric peroxisomal ATP-binding cassette transporter complex (Pxa1p-Pxa2p) OS=Komagataella pastoris (strain GS115 / ATCC 20864) GN=PAS_chr3_0822 PE=3 SV=1
Low-affinity phosphate transporter of the vacuolar membrane OS=Komagataella pastoris (strain GS115 / ATCC 20864) GN=PAS_chr3_0495 PE=4 SV=1
Transmembrane protein involved in formation of Cvt and autophagic vesicles OS=Komagataella pastoris (strain GS115 / ATCC 20864) GN=PAS_chr4_0510 PE=4 SV=1
Putative uncharacterized protein OS=Komagataella pastoris (strain GS115 / ATCC 20864) GN=PAS_chr1-1_0156 PE=4 SV=1
Glycerophosphocholine (GroPCho) phosphodiesterase OS=Komagataella pastoris (strain GS115 / ATCC 20864) GN=PAS_chr2-2_0314 PE=4 SV=1
Phosphatidylinositol-4-phosphate 5-kinase OS=Komagataella pastoris (strain GS115 / ATCC 20864) GN=PAS_chr1-1_0457 PE=4 SV=1
Uncharacterized protein OS=Komagataella pastoris (strain GS115 / ATCC 20864) GN=PAS_chr4_0930 PE=4 SV=1
Guanine nucleotide exchange factor (GEF or GDP-release factor) for Cdc42p OS=Komagataella pastoris (strain GS115 / ATCC 20864) GN=PAS_chr1-4_0533 PE=4 SV=1
Putative uncharacterized protein OS=Komagataella pastoris (strain GS115 / ATCC 20864) GN=PAS_chr2-1_0646 PE=4 SV=1
Nuclear protein that binds to RNA and to Mex67p, required for export of poly(A)+ mRNA from the nucle OS=Komagataella pastoris (strain GS115 / ATCC 20864) GN=PAS_chr3_0097 PE=4 SV=1
Transporter of the ATP-binding cassette (ABC) family involved in bile acid transport OS=Komagataella pastoris (strain GS115 / ATCC 20864) GN=PAS_chr1-1_0220 PE=3 SV=1
Ubiquitin-specific protease that removes ubiquitin from ubiquitinated proteins, cleaves at the C ter OS=Komagataella pastoris (strain GS115 / ATCC 20864) GN=PAS_chr3_0117 PE=4 SV=1
Regulatory subunit of trehalose-6-phosphate synthase/phosphatase complex OS=Komagataella pastoris (strain GS115 / ATCC 20864) GN=PAS_chr2-1_0739 PE=4 SV=1
RNA binding protein that negatively regulates growth rate OS=Komagataella pastoris (strain GS115 / ATCC 20864) GN=PAS_chr1-4_0223 PE=4 SV=1
Uncharacterized protein OS=Komagataella pastoris (strain GS115 / ATCC 20864) GN=PAS_chr4_0752 PE=4 SV=1
Sorting nexin OS=Komagataella pastoris (strain GS115 / ATCC 20864) GN=PAS_chr3_0639 PE=4 SV=1
60S ribosomal protein L36 OS=Komagataella pastoris (strain GS115 / ATCC 20864) GN=PAS_FragB_0036 PE=3 SV=1
Putative uncharacterized protein OS=Komagataella pastoris (strain GS115 / ATCC 20864) GN=PAS_chr1-4_0415 PE=4 SV=1
RNA exonuclease, required for U4 snRNA maturation OS=Komagataella pastoris (strain GS115 / ATCC 20864) GN=PAS_chr3_0681 PE=4 SV=1
Eukaryotic translation initiation factor 3 subunit C OS=Komagataella pastoris (strain GS115 / ATCC 20864) GN=NIP1 PE=3 SV=1
Enolase I, a phosphopyruvate hydratase that catalyzes the conversion of 2-phosphoglycerate to phosph OS=Komagataella pastoris (strain GS115 / ATCC 20864) GN=PAS_chr3_0082 PE=3 SV=1
Putative uncharacterized protein OS=Komagataella pastoris (strain GS115 / ATCC 20864) GN=PAS_chr2-2_0472 PE=4 SV=1
Structural maintenance of chromosomes protein OS=Komagataella pastoris (strain GS115 / ATCC 20864) GN=PAS_chr2-1_0082 PE=3 SV=1
Nucleolar protein involved in pre-rRNA processing OS=Komagataella pastoris (strain GS115 / ATCC 20864) GN=PAS_chr3_0110 PE=4 SV=1
Aromatic aminotransferase I, expression is regulated by general control of amino acid biosynthesis OS=Komagataella pastoris (strain GS115 / ATCC 20864) GN=PAS_chr1-4_0608 PE=4 SV=1
Rho GDP dissociation inhibitor involved in the localization and regulation of Cdc42p OS=Komagataella pastoris (strain GS115 / ATCC 20864) GN=PAS_chr1-1_0305 PE=4 SV=1
E3 ubiquitin ligase for Rad6p OS=Komagataella pastoris (strain GS115 / ATCC 20864) GN=PAS_chr4_0172 PE=4 SV=1
Nucleoside diphosphate kinase OS=Komagataella pastoris (strain GS115 / ATCC 20864) GN=PAS_chr2-2_0059 PE=3 SV=1
Adenylate cyclase, required for cAMP production and cAMP-dependent protein kinase signaling OS=Komagataella pastoris (strain GS115 / ATCC 20864) GN=PAS_chr4_0356 PE=4 SV=1
Mitochondrial porin (Voltage-dependent anion channel), outer membrane protein OS=Komagataella pastoris (strain GS115 / ATCC 20864) GN=PAS_chr2-2_0392 PE=4 SV=1
Predicted cytoskeleton protein OS=Komagataella pastoris (strain GS115 / ATCC 20864) GN=PAS_chr3_0518 PE=4 SV=1
Structural maintenance of chromosomes protein OS=Komagataella pastoris (strain GS115 / ATCC 20864) GN=PAS_chr2-2_0416 PE=3 SV=1
TFIID subunit (150 kDa), involved in RNA polymerase II transcription initiation OS=Komagataella pastoris (strain GS115 / ATCC 20864) GN=PAS_chr2-2_0295 PE=4 SV=1
Putative uncharacterized protein OS=Komagataella pastoris (strain GS115 / ATCC 20864) GN=PAS_chr2-2_0296 PE=4 SV=1
Protein of the mitochondrial outer surface OS=Komagataella pastoris (strain GS115 / ATCC 20864) GN=PAS_chr2-1_0535 PE=4 SV=1
Penta-EF-hand protein OS=Komagataella pastoris (strain GS115 / ATCC 20864) GN=PAS_chr1-4_0379 PE=4 SV=1
F-box receptor protein, subunit of the Skp1-Cdc53-F-box receptor (SCF) E3 ubiquitin ligase complex OS=Komagataella pastoris (strain GS115 / ATCC 20864) GN=PAS_chr2-1_0200 PE=4 SV=1
Putative uncharacterized protein OS=Komagataella pastoris (strain GS115 / ATCC 20864) GN=PAS_chr1-4_0603 PE=4 SV=1
Protein that interacts with mitotic cyclin Clb2p OS=Komagataella pastoris (strain GS115 / ATCC 20864) GN=PAS_chr2-2_0172 PE=3 SV=1
Protein containing a CUE domain that binds ubiquitin OS=Komagataella pastoris (strain GS115 / ATCC 20864) GN=PAS_chr2-2_0292 PE=4 SV=1
Dynamin-like GTPase required for vacuolar sorting OS=Komagataella pastoris (strain GS115 / ATCC 20864) GN=PAS_chr1-4_0644 PE=3 SV=1
Putative uncharacterized protein OS=Komagataella pastoris (strain GS115 / ATCC 20864) GN=PAS_chr3_0637 PE=4 SV=1
Putative uncharacterized protein OS=Komagataella pastoris (strain GS115 / ATCC 20864) GN=PAS_chr2-1_0130 PE=4 SV=1
Essential protein involved in intracellular protein transport OS=Komagataella pastoris (strain GS115 / ATCC 20864) GN=PAS_chr4_0088 PE=4 SV=1
Major transcriptional repressor of DNA-damage-regulated genes OS=Komagataella pastoris (strain GS115 / ATCC 20864) GN=PAS_chr2-2_0153 PE=4 SV=1
Putative uncharacterized protein OS=Komagataella pastoris (strain GS115 / ATCC 20864) GN=PAS_chr3_0574 PE=4 SV=1
Uncharacterized protein OS=Komagataella pastoris (strain GS115 / ATCC 20864) GN=PAS_chr4_0390 PE=4 SV=1
Adenylate kinase OS=Komagataella pastoris (strain GS115 / ATCC 20864) GN=PAS_chr3_0257 PE=3 SV=1
Putative uncharacterized protein OS=Komagataella pastoris (strain GS115 / ATCC 20864) GN=PAS_chr2-1_0722 PE=4 SV=1
Uncharacterized protein OS=Komagataella pastoris (strain GS115 / ATCC 20864) GN=PAS_FragD_0019 PE=3 SV=1
Protein component of the large (60S) ribosomal subunit, identical to Rpl42Ap and has similarity to r OS=Komagataella pastoris (strain GS115 / ATCC 20864) GN=PAS_chr3_0194 PE=3 SV=1
Putative uncharacterized protein OS=Komagataella pastoris (strain GS115 / ATCC 20864) GN=PAS_chr2-2_0451 PE=4 SV=1
Putative uncharacterized protein OS=Komagataella pastoris (strain GS115 / ATCC 20864) GN=PAS_chr3_1247 PE=4 SV=1
Eukaryotic translation initiation factor 3 subunit A OS=Komagataella pastoris (strain GS115 / ATCC 20864) GN=TIF32 PE=3 SV=1
Co-chaperone that binds to Hsp82p and activates its ATPase activity OS=Komagataella pastoris (strain GS115 / ATCC 20864) GN=PAS_chr3_0170 PE=4 SV=1
Putative GDP/GTP exchange factor required for mitotic exit at low temperatures OS=Komagataella pastoris (strain GS115 / ATCC 20864) GN=PAS_chr3_0758 PE=4 SV=1
Protein required for export of the ribosomal subunits OS=Komagataella pastoris (strain GS115 / ATCC 20864) GN=PAS_chr1-4_0319 PE=4 SV=1
Arginyl-tRNA synthetase OS=Komagataella pastoris (strain GS115 / ATCC 20864) GN=PAS_chr3_0166 PE=3 SV=1
Palmitoyltransferase OS=Komagataella pastoris (strain GS115 / ATCC 20864) GN=PAS_chr3_0246 PE=3 SV=1
ATPase that forms a large complex, containing actin and several actin-related proteins OS=Komagataella pastoris (strain GS115 / ATCC 20864) GN=PAS_chr1-1_0087 PE=4 SV=1
GTPase activating protein (GAP) for Rho1p, involved in signaling to the actin cytoskeleton, null mut OS=Komagataella pastoris (strain GS115 / ATCC 20864) GN=PAS_chr2-1_0117 PE=4 SV=1
Putative cysteine protease similar to mammalian caspases OS=Komagataella pastoris (strain GS115 / ATCC 20864) GN=PAS_chr1-4_0430 PE=4 SV=1
BAR domain-containing protein that localizes to both early and late Golgi vesicles OS=Komagataella pastoris (strain GS115 / ATCC 20864) GN=PAS_chr4_0182 PE=4 SV=1
Glutamine-dependent NAD(+) synthetase OS=Komagataella pastoris (strain GS115 / ATCC 20864) GN=PAS_chr4_0233 PE=4 SV=1
Putative uncharacterized protein OS=Komagataella pastoris (strain GS115 / ATCC 20864) GN=PAS_chr1-1_0478 PE=4 SV=1
Cytoskeletal protein binding protein required for assembly of the cortical actin cytoskeleton OS=Komagataella pastoris (strain GS115 / ATCC 20864) GN=PAS_chr2-1_0366 PE=4 SV=1
Protein component of the small (40S) ribosomal subunit OS=Komagataella pastoris (strain GS115 / ATCC 20864) GN=PAS_chr3_0290 PE=4 SV=1
Kinesin-related motor protein involved in mitotic spindle positioning OS=Komagataella pastoris (strain GS115 / ATCC 20864) GN=PAS_chr4_0091 PE=3 SV=1
Putative uncharacterized protein OS=Komagataella pastoris (strain GS115 / ATCC 20864) GN=PAS_chr2-1_0870 PE=4 SV=1
Putative uncharacterized protein OS=Komagataella pastoris (strain GS115 / ATCC 20864) GN=PAS_chr1-1_0104 PE=4 SV=1
Component (70 kDa) of the TOM (Translocase of outer membrane) complex OS=Komagataella pastoris (strain GS115 / ATCC 20864) GN=PAS_chr2-2_0370 PE=4 SV=1
Regulatory subunit of the Atg1p signaling complex OS=Komagataella pastoris (strain GS115 / ATCC 20864) GN=PAS_chr2-2_0432 PE=4 SV=1
Uncharacterized protein OS=Komagataella pastoris (strain GS115 / ATCC 20864) GN=PAS_chr4_0553 PE=4 SV=1
Putative uncharacterized protein OS=Komagataella pastoris (strain GS115 / ATCC 20864) GN=PAS_chr2-1_0876 PE=4 SV=1
Essential protein possibly involved in secretion OS=Komagataella pastoris (strain GS115 / ATCC 20864) GN=PAS_chr3_0292 PE=4 SV=1
Transcriptional activator that enhances pseudohyphal growth OS=Komagataella pastoris (strain GS115 / ATCC 20864) GN=PAS_chr4_0326 PE=4 SV=1
Putative uncharacterized protein OS=Komagataella pastoris (strain GS115 / ATCC 20864) GN=PAS_chr3_1189 PE=4 SV=1
Putative phosphopantothenoylcysteine synthetase (PPCS) OS=Komagataella pastoris (strain GS115 / ATCC 20864) GN=PAS_chr2-2_0204 PE=4 SV=1
Protein proposed to be involved in the modification of N-linked oligosaccharides OS=Komagataella pastoris (strain GS115 / ATCC 20864) GN=PAS_chr2-2_0121 PE=4 SV=1
Ubiquitin-like protein of the SUMO family OS=Komagataella pastoris (strain GS115 / ATCC 20864) GN=PAS_chr1-4_0205 PE=4 SV=1
Putative uncharacterized protein OS=Komagataella pastoris (strain GS115 / ATCC 20864) GN=PAS_chr1-1_0148 PE=4 SV=1
Mitochondrial matrix ATPase OS=Komagataella pastoris (strain GS115 / ATCC 20864) GN=PAS_chr3_0365 PE=3 SV=1
Vacuolar membrane zinc transporter OS=Komagataella pastoris (strain GS115 / ATCC 20864) GN=PAS_chr3_0966 PE=4 SV=1
Uncharacterized protein OS=Komagataella pastoris (strain GS115 / ATCC 20864) GN=PAS_chr4_0797 PE=4 SV=1
Subunit of the SAGA transcriptional regulatory complex but not present in SAGA-like complex SLIK/SAL OS=Komagataella pastoris (strain GS115 / ATCC 20864) GN=PAS_chr1-4_0365 PE=4 SV=1
Putative GTPase that associates with pre-60S ribosomal subunits in the nucleolus OS=Komagataella pastoris (strain GS115 / ATCC 20864) GN=PAS_chr4_0423 PE=4 SV=1
Putative uncharacterized protein OS=Komagataella pastoris (strain GS115 / ATCC 20864) GN=PAS_c131_0010 PE=4 SV=1
Protein component of the large (60S) ribosomal subunit, identical to Rpl43Ap OS=Komagataella pastoris (strain GS115 / ATCC 20864) GN=PAS_chr3_0335 PE=3 SV=1
Uncharacterized protein OS=Komagataella pastoris (strain GS115 / ATCC 20864) GN=PAS_chr4_0959 PE=4 SV=1
Pseudouridine synthase catalytic subunit of box H/ACA small nucleolar ribonucleoprotein particles OS=Komagataella pastoris (strain GS115 / ATCC 20864) GN=PAS_chr2-2_0149 PE=4 SV=1
Midasin OS=Komagataella pastoris (strain GS115 / ATCC 20864) GN=PAS_chr1-1_0187 PE=3 SV=1
Putative uncharacterized protein OS=Komagataella pastoris (strain GS115 / ATCC 20864) GN=PAS_chr3_0348 PE=4 SV=1
Protein involved in G2/M phase progression and response to DNA damage, interacts with Rad53p OS=Komagataella pastoris (strain GS115 / ATCC 20864) GN=PAS_chr2-2_0211 PE=4 SV=1
Uncharacterized protein OS=Komagataella pastoris (strain GS115 / ATCC 20864) GN=PAS_chr4_0550 PE=4 SV=1
Putative uncharacterized protein OS=Komagataella pastoris (strain GS115 / ATCC 20864) GN=PAS_chr1-4_0312 PE=4 SV=1
Beta regulatory subunit of casein kinase 2, a Ser/Thr protein kinase OS=Komagataella pastoris (strain GS115 / ATCC 20864) GN=PAS_chr4_0402 PE=4 SV=1
Probable zinc metalloprotease PAS_chr3_0953 OS=Komagataella pastoris (strain GS115 / ATCC 20864) GN=PAS_chr3_0953 PE=3 SV=1
Protein involved in postreplication repair OS=Komagataella pastoris (strain GS115 / ATCC 20864) GN=PAS_chr2-1_0274 PE=4 SV=1
Cytosolic J-domain-containing protein OS=Komagataella pastoris (strain GS115 / ATCC 20864) GN=PAS_chr2-2_0085 PE=4 SV=1
Plasma membrane Mg(2+) transporter, expression and turnover are regulated by Mg(2+) concentration OS=Komagataella pastoris (strain GS115 / ATCC 20864) GN=PAS_chr1-4_0096 PE=4 SV=1
Putative uncharacterized protein OS=Komagataella pastoris (strain GS115 / ATCC 20864) GN=PAS_chr2-2_0214 PE=4 SV=1
Dual-specificity protein phosphatase OS=Komagataella pastoris (strain GS115 / ATCC 20864) GN=PAS_chr3_0618 PE=4 SV=1
Protein component of the large (60S) ribosomal subunit, nearly identical to Rpl19Ap and has similari OS=Komagataella pastoris (strain GS115 / ATCC 20864) GN=PAS_chr3_0091 PE=3 SV=1
Thioredoxin reductase OS=Komagataella pastoris (strain GS115 / ATCC 20864) GN=PAS_chr2-2_0480 PE=3 SV=1
Serine-threonine protein kinase that is part of a glucose-sensing system OS=Komagataella pastoris (strain GS115 / ATCC 20864) GN=PAS_chr3_0873 PE=4 SV=1
Clathrin heavy chain, subunit of the major coat protein OS=Komagataella pastoris (strain GS115 / ATCC 20864) GN=PAS_chr1-4_0546 PE=4 SV=1
Essential protein involved in the processing of pre-rRNA and the assembly of 60S ribosomal subunit OS=Komagataella pastoris (strain GS115 / ATCC 20864) GN=PAS_chr3_0991 PE=4 SV=1
UBX (Ubiquitin regulatory X) domain-containing protein that regulates Glc7p phosphatase activity and OS=Komagataella pastoris (strain GS115 / ATCC 20864) GN=PAS_chr2-1_0159 PE=4 SV=1
Subunit of the NuA3 histone acetyltransferase complex that acetylates histone H3 OS=Komagataella pastoris (strain GS115 / ATCC 20864) GN=PAS_FragD_0029 PE=4 SV=1
Elongation factor 2 (EF-2), also encoded by EFT1 OS=Komagataella pastoris (strain GS115 / ATCC 20864) GN=PAS_chr2-1_0124 PE=4 SV=1
Component of the Sin3p-Rpd3p histone deacetylase complex OS=Komagataella pastoris (strain GS115 / ATCC 20864) GN=PAS_chr3_0245 PE=4 SV=1
Nuclear polyadenylated RNA-binding protein OS=Komagataella pastoris (strain GS115 / ATCC 20864) GN=PAS_chr1-4_0590 PE=4 SV=1
Dihydroxyacetone kinase, required for detoxification of dihydroxyacetone (DHA) OS=Komagataella pastoris (strain GS115 / ATCC 20864) GN=PAS_chr3_0841 PE=4 SV=1
S-adenosyl-L-methionine-dependent tRNA: m5C-methyltransferase OS=Komagataella pastoris (strain GS115 / ATCC 20864) GN=PAS_chr4_0445 PE=4 SV=1
Putative uncharacterized protein OS=Komagataella pastoris (strain GS115 / ATCC 20864) GN=PAS_chr2-1_0602 PE=4 SV=1
Peptidyl-prolyl cis-trans isomerase (Cyclophilin) OS=Komagataella pastoris (strain GS115 / ATCC 20864) GN=PAS_chr3_0567 PE=4 SV=1
Subunit of the Set3C deacetylase complex that interacts directly with the Set3C subunit OS=Komagataella pastoris (strain GS115 / ATCC 20864) GN=PAS_chr3_0600 PE=4 SV=1
Putative uncharacterized protein OS=Komagataella pastoris (strain GS115 / ATCC 20864) GN=PAS_chr2-2_0032 PE=4 SV=1
Putative uncharacterized protein OS=Komagataella pastoris (strain GS115 / ATCC 20864) GN=PAS_chr1-3_0121 PE=4 SV=1
Delta(24)-sterol C-methyltransferase OS=Komagataella pastoris (strain GS115 / ATCC 20864) GN=PAS_chr3_0371 PE=4 SV=1
Protein that forms a complex with the Sit4p protein phosphatase OS=Komagataella pastoris (strain GS115 / ATCC 20864) GN=PAS_chr1-3_0135 PE=4 SV=1
Putative uncharacterized protein OS=Komagataella pastoris (strain GS115 / ATCC 20864) GN=PAS_chr1-1_0033 PE=4 SV=1
Putative uncharacterized protein OS=Komagataella pastoris (strain GS115 / ATCC 20864) GN=PAS_chr2-2_0367 PE=4 SV=1
Putative uncharacterized protein OS=Komagataella pastoris (strain GS115 / ATCC 20864) GN=PAS_chr1-1_0228 PE=4 SV=1
ATP binding cassette family member OS=Komagataella pastoris (strain GS115 / ATCC 20864) GN=PAS_chr3_0728 PE=3 SV=1
Cholinephosphate cytidylyltransferase, also known as CTP:phosphocholine cytidylyltransferase OS=Komagataella pastoris (strain GS115 / ATCC 20864) GN=PAS_chr2-2_0401 PE=4 SV=1
Delta(9) fatty acid desaturase OS=Komagataella pastoris (strain GS115 / ATCC 20864) GN=PAS_chr2-1_0072 PE=3 SV=1
Fe-S cluster assembly protein DRE2 OS=Komagataella pastoris (strain GS115 / ATCC 20864) GN=DRE2 PE=3 SV=1
Uncharacterized protein OS=Komagataella pastoris (strain GS115 / ATCC 20864) GN=PAS_chr4_0770 PE=4 SV=1
One of two (See also PSK1) PAS domain containing S/T protein kinases OS=Komagataella pastoris (strain GS115 / ATCC 20864) GN=PAS_chr4_0076 PE=4 SV=1
PEX19; peroxisomal biogenesis protein OS=Komagataella pastoris (strain GS115 / ATCC 20864) GN=PAS_chr2-1_0715 PE=4 SV=1
Cystathionine beta-lyase, converts cystathionine into homocysteine OS=Komagataella pastoris (strain GS115 / ATCC 20864) GN=PAS_chr2-1_0358 PE=3 SV=1
Putative ATP-dependent permease of the ABC transporter family of proteins OS=Komagataella pastoris (strain GS115 / ATCC 20864) GN=PAS_chr3_0935 PE=4 SV=1
Putative uncharacterized protein OS=Komagataella pastoris (strain GS115 / ATCC 20864) GN=PAS_chr3_0138 PE=4 SV=1
Putative uncharacterized protein OS=Komagataella pastoris (strain GS115 / ATCC 20864) GN=PAS_chr3_1176 PE=4 SV=1
Uncharacterized protein OS=Komagataella pastoris (strain GS115 / ATCC 20864) GN=PAS_chr4_0379 PE=4 SV=1
Putative uncharacterized protein OS=Komagataella pastoris (strain GS115 / ATCC 20864) GN=PAS_chr2-1_0526 PE=4 SV=1
Plasma membrane arginine permease, requires phosphatidyl ethanolamine (PE) for localization OS=Komagataella pastoris (strain GS115 / ATCC 20864) GN=PAS_chr1-4_0601 PE=4 SV=1
Actin assembly factor, activates the Arp2/3 protein complex that nucleates branched actin filaments OS=Komagataella pastoris (strain GS115 / ATCC 20864) GN=PAS_chr1-4_0623 PE=4 SV=1
Transcriptional activator of genes regulated by nitrogen catabolite repression (NCR) OS=Komagataella pastoris (strain GS115 / ATCC 20864) GN=PAS_chr1-3_0126 PE=4 SV=1
Essential protein, constituent of 66S pre-ribosomal particles OS=Komagataella pastoris (strain GS115 / ATCC 20864) GN=PAS_chr2-1_0245 PE=4 SV=1
Putative uncharacterized protein OS=Komagataella pastoris (strain GS115 / ATCC 20864) GN=PAS_chr3_0297 PE=4 SV=1
Uncharacterized protein OS=Komagataella pastoris (strain GS115 / ATCC 20864) GN=PAS_chr4_0922 PE=4 SV=1
Protein component of the small (40S) ribosomal subunit OS=Komagataella pastoris (strain GS115 / ATCC 20864) GN=PAS_chr4_0414 PE=3 SV=1
Putative uncharacterized protein OS=Komagataella pastoris (strain GS115 / ATCC 20864) GN=PAS_chr2-1_0231 PE=4 SV=1
ADP-ribosylation factor (ARF) GTPase activating protein (GAP) effector OS=Komagataella pastoris (strain GS115 / ATCC 20864) GN=PAS_chr1-4_0340 PE=4 SV=1
Heat shock protein Hsp90 OS=Komagataella pastoris (strain GS115 / ATCC 20864) GN=PAS_chr1-4_0130 PE=3 SV=1
Guanine nucleotide exchange factor OS=Komagataella pastoris (strain GS115 / ATCC 20864) GN=PAS_chr3_0203 PE=4 SV=1
Aromatic aminotransferase II OS=Komagataella pastoris (strain GS115 / ATCC 20864) GN=PAS_chr4_0147 PE=4 SV=1
Uncharacterized protein OS=Komagataella pastoris (strain GS115 / ATCC 20864) GN=PAS_chr4_0372 PE=4 SV=1
ADP-ribosylation factor GTPase activating protein (ARF GAP), involved in ER-Golgi transport OS=Komagataella pastoris (strain GS115 / ATCC 20864) GN=PAS_chr3_0974 PE=4 SV=1
Protein kinase, phosphorylates the alpha-subunit of translation initiation factor eIF2 (Sui2p) OS=Komagataella pastoris (strain GS115 / ATCC 20864) GN=PAS_chr3_0850 PE=4 SV=1
Putative uncharacterized protein OS=Komagataella pastoris (strain GS115 / ATCC 20864) GN=PAS_chr1-1_0425 PE=4 SV=1
Putative uncharacterized protein OS=Komagataella pastoris (strain GS115 / ATCC 20864) GN=PAS_chr1-1_0387 PE=4 SV=1
Putative uncharacterized protein OS=Komagataella pastoris (strain GS115 / ATCC 20864) GN=PAS_chr1-3_0296 PE=4 SV=1
ADP-ribosylation factor GTPase activating protein (ARF GAP) OS=Komagataella pastoris (strain GS115 / ATCC 20864) GN=PAS_chr3_0559 PE=4 SV=1
Choline kinase, catalyzing the first step in phosphatidylcholine synthesis via the CDP-choline OS=Komagataella pastoris (strain GS115 / ATCC 20864) GN=PAS_chr1-4_0390 PE=4 SV=1
Putative uncharacterized protein OS=Komagataella pastoris (strain GS115 / ATCC 20864) GN=PAS_chr2-2_0261 PE=4 SV=1
Dipeptidyl aminopeptidase, Golgi integral membrane protein OS=Komagataella pastoris (strain GS115 / ATCC 20864) GN=PAS_chr2-2_0310 PE=4 SV=1
Essential subunit of the Pan2p-Pan3p poly(A)-ribonuclease complex OS=Komagataella pastoris (strain GS115 / ATCC 20864) GN=PAS_chr2-1_0541 PE=4 SV=1
Subunit of the HIR complex, a nucleosome assembly complex OS=Komagataella pastoris (strain GS115 / ATCC 20864) GN=PAS_chr2-1_0799 PE=4 SV=1
Putative uncharacterized protein OS=Komagataella pastoris (strain GS115 / ATCC 20864) GN=PAS_chr3_1209 PE=4 SV=1
Mitochondrial elongation factor involved in translational elongation OS=Komagataella pastoris (strain GS115 / ATCC 20864) GN=PAS_chr4_0033 PE=4 SV=1
Catalytic subunit of the Dcp1p-Dcp2p decapping enzyme complex OS=Komagataella pastoris (strain GS115 / ATCC 20864) GN=PAS_chr4_0194 PE=4 SV=1
RNA polymerase II-associated protein OS=Komagataella pastoris (strain GS115 / ATCC 20864) GN=PAS_chr4_0885 PE=4 SV=1
General negative regulator of transcription subunit 4 OS=Komagataella pastoris (strain GS115 / ATCC 20864) GN=PAS_chr1-4_0594 PE=4 SV=1
Ubiquitin-protein ligase (E3) that interacts with Rpt4p and Rpt6p OS=Komagataella pastoris (strain GS115 / ATCC 20864) GN=PAS_chr1-1_0363 PE=4 SV=1
Subunit of the origin recognition complex, which directs DNA replication OS=Komagataella pastoris (strain GS115 / ATCC 20864) GN=PAS_chr3_0941 PE=4 SV=1
Putative uncharacterized protein OS=Komagataella pastoris (strain GS115 / ATCC 20864) GN=PAS_chr1-4_0052 PE=4 SV=1
Sensor-transducer of the stress-activated PKC1-MPK1 kinase pathway OS=Komagataella pastoris (strain GS115 / ATCC 20864) GN=PAS_chr3_0673 PE=4 SV=1
Putative uncharacterized protein OS=Komagataella pastoris (strain GS115 / ATCC 20864) GN=PAS_FragB_0058 PE=4 SV=1
Constituent of 66S pre-ribosomal particles, involved in 60S ribosomal subunit biogenesis OS=Komagataella pastoris (strain GS115 / ATCC 20864) GN=PAS_chr2-1_0234 PE=4 SV=1
Putative uncharacterized protein OS=Komagataella pastoris (strain GS115 / ATCC 20864) GN=PAS_chr3_0191 PE=4 SV=1
Putative uncharacterized protein OS=Komagataella pastoris (strain GS115 / ATCC 20864) GN=PAS_chr1-3_0233 PE=4 SV=1
Methionine and cysteine synthase (O-acetyl homoserine-O-acetyl serine sulfhydrylase) OS=Komagataella pastoris (strain GS115 / ATCC 20864) GN=PAS_chr4_0330 PE=3 SV=1
Vacuolar protein sorting-associated protein 35 OS=Komagataella pastoris (strain GS115 / ATCC 20864) GN=PAS_chr1-4_0503 PE=3 SV=1
ER membrane protein OS=Komagataella pastoris (strain GS115 / ATCC 20864) GN=PAS_chr3_0626 PE=4 SV=1
Protein that binds to cruciform DNA structures OS=Komagataella pastoris (strain GS115 / ATCC 20864) GN=PAS_chr3_0627 PE=4 SV=1
Protein involved in the regulation of cell wall synthesis OS=Komagataella pastoris (strain GS115 / ATCC 20864) GN=PAS_chr3_0768 PE=4 SV=1
Essential nucleolar protein required for 40S ribosome biogenesis OS=Komagataella pastoris (strain GS115 / ATCC 20864) GN=PAS_chr1-4_0098 PE=4 SV=1
Protein component of the large (60S) ribosomal subunit, nearly identical to Rpl12Ap OS=Komagataella pastoris (strain GS115 / ATCC 20864) GN=PAS_chr1-1_0189 PE=3 SV=1
Putative uncharacterized protein OS=Komagataella pastoris (strain GS115 / ATCC 20864) GN=PAS_chr2-2_0459 PE=4 SV=1
Uncharacterized protein OS=Komagataella pastoris (strain GS115 / ATCC 20864) GN=PAS_chr4_0656 PE=4 SV=1
Catalase OS=Komagataella pastoris (strain GS115 / ATCC 20864) GN=PAS_chr2-2_0131 PE=3 SV=1
Uncharacterized protein OS=Komagataella pastoris (strain GS115 / ATCC 20864) GN=PAS_chr4_0407 PE=4 SV=1
Protein that forms a complex with Spt4p OS=Komagataella pastoris (strain GS115 / ATCC 20864) GN=PAS_chr3_1136 PE=4 SV=1
Putative uncharacterized protein OS=Komagataella pastoris (strain GS115 / ATCC 20864) GN=PAS_chr1-3_0260 PE=4 SV=1
Putative uncharacterized protein OS=Komagataella pastoris (strain GS115 / ATCC 20864) GN=PAS_chr2-1_0807 PE=4 SV=1
Putative uncharacterized protein OS=Komagataella pastoris (strain GS115 / ATCC 20864) GN=PAS_chr3_1030 PE=4 SV=1
Sulfite reductase beta subunit, involved in amino acid biosynthesis, transcription repressed by meth OS=Komagataella pastoris (strain GS115 / ATCC 20864) GN=PAS_chr3_1084 PE=4 SV=1
MAP kinase OS=Komagataella pastoris (strain GS115 / ATCC 20864) GN=PAS_chr1-4_0008 PE=4 SV=1
Phosphoribosylaminoimidazole carboxylase, catalyzes a step in the ~de novo~ purine nucleotide biosyn OS=Komagataella pastoris (strain GS115 / ATCC 20864) GN=PAS_chr3_0085 PE=4 SV=1
Essential protein involved in rRNA and snoRNA maturation OS=Komagataella pastoris (strain GS115 / ATCC 20864) GN=PAS_chr1-3_0228 PE=4 SV=1
One of three possible beta-subunits of the Snf1 kinase complex OS=Komagataella pastoris (strain GS115 / ATCC 20864) GN=PAS_chr1-4_0498 PE=4 SV=1
Forkhead transcription factor OS=Komagataella pastoris (strain GS115 / ATCC 20864) GN=PAS_chr1-4_0286 PE=3 SV=1
Adenosylhomocysteinase OS=Komagataella pastoris (strain GS115 / ATCC 20864) GN=PAS_chr3_0890 PE=3 SV=1
Putative uncharacterized protein OS=Komagataella pastoris (strain GS115 / ATCC 20864) GN=PAS_chr1-1_0422 PE=4 SV=1
Component of mRNP complexes associated with polyribosomes OS=Komagataella pastoris (strain GS115 / ATCC 20864) GN=PAS_chr1-4_0428 PE=4 SV=1
Cyclin (Bur2p)-dependent protein kinase that functions in transcriptional regulation OS=Komagataella pastoris (strain GS115 / ATCC 20864) GN=PAS_chr3_0375 PE=4 SV=1
Putative uncharacterized protein OS=Komagataella pastoris (strain GS115 / ATCC 20864) GN=PAS_chr1-3_0180 PE=4 SV=1
Putative uncharacterized protein OS=Komagataella pastoris (strain GS115 / ATCC 20864) GN=PAS_chr1-3_0111 PE=4 SV=1
Bifunctional carbamoylphosphate synthetase (CPSase)-aspartate transcarbamylase (ATCase) OS=Komagataella pastoris (strain GS115 / ATCC 20864) GN=PAS_chr2-2_0142 PE=3 SV=1
Putative uncharacterized protein OS=Komagataella pastoris (strain GS115 / ATCC 20864) GN=PAS_chr2-2_0352 PE=4 SV=1
Highly conserved nuclear protein required for actin cytoskeleton organization OS=Komagataella pastoris (strain GS115 / ATCC 20864) GN=PAS_chr1-4_0311 PE=4 SV=1
Lanosterol 14-alpha-demethylase, catalyzes the C-14 demethylation of lanosterol OS=Komagataella pastoris (strain GS115 / ATCC 20864) GN=PAS_chr3_0957 PE=3 SV=1
Putative uncharacterized protein OS=Komagataella pastoris (strain GS115 / ATCC 20864) GN=PAS_chr2-2_0345 PE=4 SV=1
Replication factor C subunit OS=Komagataella pastoris (strain GS115 / ATCC 20864) GN=PAS_chr1-4_0269 PE=4 SV=1
Putative uncharacterized protein OS=Komagataella pastoris (strain GS115 / ATCC 20864) GN=PAS_chr2-2_0156 PE=4 SV=1
Cytoplasmic ATP-dependent RNA helicase of the DEAD-box family OS=Komagataella pastoris (strain GS115 / ATCC 20864) GN=PAS_chr1-3_0074 PE=4 SV=1
Uncharacterized protein OS=Komagataella pastoris (strain GS115 / ATCC 20864) GN=PAS_chr4_0711 PE=4 SV=1
Hsp70 protein that interacts with Zuo1p (A DnaJ homolog) to form a ribosome-associated complex OS=Komagataella pastoris (strain GS115 / ATCC 20864) GN=PAS_chr1-1_0036 PE=3 SV=1
Putative uncharacterized protein OS=Komagataella pastoris (strain GS115 / ATCC 20864) GN=PAS_chr1-1_0496 PE=4 SV=1
Putative uncharacterized protein OS=Komagataella pastoris (strain GS115 / ATCC 20864) GN=PAS_chr3_0395 PE=4 SV=1
Putative uncharacterized protein OS=Komagataella pastoris (strain GS115 / ATCC 20864) GN=PAS_chr1-3_0173 PE=4 SV=1
Putative uncharacterized protein OS=Komagataella pastoris (strain GS115 / ATCC 20864) GN=PAS_chr2-1_0886 PE=4 SV=1
Protein that interacts with silencing proteins at the telomere OS=Komagataella pastoris (strain GS115 / ATCC 20864) GN=PAS_chr4_0833 PE=4 SV=1
ATP-dependent helicase OS=Komagataella pastoris (strain GS115 / ATCC 20864) GN=PAS_FragB_0056 PE=4 SV=1
tRNA:pseudouridine synthase, introduces pseudouridines at positions 26-28, 34-36, 65, and 67 of tRNA OS=Komagataella pastoris (strain GS115 / ATCC 20864) GN=PAS_chr1-4_0212 PE=4 SV=1
Eukaryotic initiation factor (EIF) 2A OS=Komagataella pastoris (strain GS115 / ATCC 20864) GN=PAS_chr2-2_0058 PE=4 SV=1
Gamma subunit of the translation initiation factor eIF2 OS=Komagataella pastoris (strain GS115 / ATCC 20864) GN=PAS_chr3_0839 PE=4 SV=1
Protein component of the large (60S) ribosomal subunit, identical to Rpl35Ap OS=Komagataella pastoris (strain GS115 / ATCC 20864) GN=PAS_chr1-1_0302 PE=3 SV=1
Beta subunit of fatty acid synthetase; catalyzes the synthesis of long-chain saturated fatty acids OS=Komagataella pastoris (strain GS115 / ATCC 20864) GN=PAS_chr1-1_0008 PE=4 SV=1
High osmolarity signaling protein SHO1 OS=Komagataella pastoris (strain GS115 / ATCC 20864) GN=SHO1 PE=3 SV=1
Uncharacterized protein OS=Komagataella pastoris (strain GS115 / ATCC 20864) GN=PAS_chr4_0628 PE=4 SV=1
Protein involved in 20S proteasome assembly OS=Komagataella pastoris (strain GS115 / ATCC 20864) GN=PAS_chr2-1_0552 PE=4 SV=1
Catalytic subunit of the COP9 signalosome (CSN) complex OS=Komagataella pastoris (strain GS115 / ATCC 20864) GN=PAS_chr1-3_0105 PE=4 SV=1
Uncharacterized protein OS=Komagataella pastoris (strain GS115 / ATCC 20864) GN=PAS_chr4_0551 PE=4 SV=1
Putative transporter, member of the sugar porter family OS=Komagataella pastoris (strain GS115 / ATCC 20864) GN=PAS_chr1-3_0011 PE=3 SV=1
Calmodulin-dependent protein kinase OS=Komagataella pastoris (strain GS115 / ATCC 20864) GN=PAS_chr1-4_0302 PE=4 SV=1
Putative uncharacterized protein OS=Komagataella pastoris (strain GS115 / ATCC 20864) GN=PAS_FragB_0045 PE=4 SV=1
Uncharacterized protein OS=Komagataella pastoris (strain GS115 / ATCC 20864) GN=PAS_chr4_0884 PE=4 SV=1
Putative uncharacterized protein OS=Komagataella pastoris (strain GS115 / ATCC 20864) GN=PAS_chr2-1_0874 PE=4 SV=1
Putative uncharacterized protein OS=Komagataella pastoris (strain GS115 / ATCC 20864) GN=PAS_chr1-4_0666 PE=4 SV=1
TFIIF (Transcription Factor II) largest subunit OS=Komagataella pastoris (strain GS115 / ATCC 20864) GN=PAS_chr4_0518 PE=4 SV=1
Putative uncharacterized protein OS=Komagataella pastoris (strain GS115 / ATCC 20864) GN=PAS_chr2-1_0434 PE=4 SV=1
RNA polymerase subunit ABC14.5, common to RNA polymerases I, II, and III OS=Komagataella pastoris (strain GS115 / ATCC 20864) GN=PAS_chr2-2_0309 PE=4 SV=1
Phosphorylase OS=Komagataella pastoris (strain GS115 / ATCC 20864) GN=PAS_chr2-1_0173 PE=3 SV=1
Protein required for proper cell fusion and cell morphology OS=Komagataella pastoris (strain GS115 / ATCC 20864) GN=PAS_chr3_0298 PE=4 SV=1
Putative uncharacterized protein OS=Komagataella pastoris (strain GS115 / ATCC 20864) GN=PAS_chr2-1_0737 PE=4 SV=1
Proteosome activator subunit OS=Komagataella pastoris (strain GS115 / ATCC 20864) GN=PAS_chr3_0776 PE=4 SV=1
Uncharacterized protein OS=Komagataella pastoris (strain GS115 / ATCC 20864) GN=PAS_chr4_0089 PE=4 SV=1
Protein component of the large (60S) ribosomal subunit OS=Komagataella pastoris (strain GS115 / ATCC 20864) GN=PAS_chr4_0139 PE=3 SV=1
GTP-binding protein YPT10 OS=Komagataella pastoris (strain GS115 / ATCC 20864) GN=PAS_chr1-4_0626 PE=3 SV=1
Ubiquitin carboxyl-terminal hydrolase OS=Komagataella pastoris (strain GS115 / ATCC 20864) GN=PAS_chr1-1_0040 PE=3 SV=1
Protein component of the small (40S) ribosomal subunit OS=Komagataella pastoris (strain GS115 / ATCC 20864) GN=PAS_chr1-4_0353 PE=4 SV=1
Subunit of the Hat1p-Hat2p histone acetyltransferase complex OS=Komagataella pastoris (strain GS115 / ATCC 20864) GN=PAS_chr2-1_0205 PE=4 SV=1
Protein involved in cell morphogenesis and proliferation, associated with protein kinase Cbk1p OS=Komagataella pastoris (strain GS115 / ATCC 20864) GN=PAS_chr4_0119 PE=4 SV=1
Rab escort protein, forms a complex with the Ras-like small GTPase Ypt1p OS=Komagataella pastoris (strain GS115 / ATCC 20864) GN=PAS_chr3_0586 PE=4 SV=1
Putative uncharacterized protein OS=Komagataella pastoris (strain GS115 / ATCC 20864) GN=PAS_chr1-1_0178 PE=4 SV=1
Putative uncharacterized protein OS=Komagataella pastoris (strain GS115 / ATCC 20864) GN=PAS_chr2-1_0808 PE=4 SV=1
Putative uncharacterized protein OS=Komagataella pastoris (strain GS115 / ATCC 20864) GN=PAS_chr2-2_0479 PE=4 SV=1
Putative uncharacterized protein OS=Komagataella pastoris (strain GS115 / ATCC 20864) GN=PAS_c131_0011 PE=4 SV=1
Vacuolar sorting protein OS=Komagataella pastoris (strain GS115 / ATCC 20864) GN=PAS_chr1-1_0034 PE=4 SV=1
Palmitoylated, plasma membrane-bound casein kinase I isoform OS=Komagataella pastoris (strain GS115 / ATCC 20864) GN=PAS_chr4_0568 PE=4 SV=1
TFIID subunit (48 kDa) OS=Komagataella pastoris (strain GS115 / ATCC 20864) GN=PAS_chr3_0267 PE=4 SV=1
High affinity methionine permease OS=Komagataella pastoris (strain GS115 / ATCC 20864) GN=PAS_chr2-1_0351 PE=4 SV=1
E3 ubiquitin ligase of the hect-domain class OS=Komagataella pastoris (strain GS115 / ATCC 20864) GN=PAS_chr3_0044 PE=4 SV=1
Putative uncharacterized protein OS=Komagataella pastoris (strain GS115 / ATCC 20864) GN=PAS_chr1-4_0100 PE=4 SV=1
Putative uncharacterized protein OS=Komagataella pastoris (strain GS115 / ATCC 20864) GN=PAS_chr1-4_0344 PE=4 SV=1
Zinc-finger transcription factor OS=Komagataella pastoris (strain GS115 / ATCC 20864) GN=PAS_chr4_0202 PE=4 SV=1
Putative uncharacterized protein OS=Komagataella pastoris (strain GS115 / ATCC 20864) GN=PAS_chr2-1_0266 PE=4 SV=1
Putative uncharacterized protein OS=Komagataella pastoris (strain GS115 / ATCC 20864) GN=PAS_chr2-1_0682 PE=4 SV=1
Phosphoinositide PI4,5P(2) binding protein, forms a complex with Slm2p OS=Komagataella pastoris (strain GS115 / ATCC 20864) GN=PAS_chr1-4_0418 PE=4 SV=1
Component of the RSC chromatin remodeling complex OS=Komagataella pastoris (strain GS115 / ATCC 20864) GN=PAS_chr2-2_0050 PE=4 SV=1
Putative uncharacterized protein OS=Komagataella pastoris (strain GS115 / ATCC 20864) GN=PAS_chr2-1_0693 PE=4 SV=1
Putative uncharacterized protein OS=Komagataella pastoris (strain GS115 / ATCC 20864) GN=PAS_chr3_0260 PE=4 SV=1
Phosphoglucomutase OS=Komagataella pastoris (strain GS115 / ATCC 20864) GN=PAS_chr1-4_0264 PE=3 SV=1
Putative uncharacterized protein OS=Komagataella pastoris (strain GS115 / ATCC 20864) GN=PAS_chr2-1_0177 PE=4 SV=1
Upstream serine/threonine kinase for the SNF1 complex OS=Komagataella pastoris (strain GS115 / ATCC 20864) GN=PAS_chr2-1_0639 PE=4 SV=1
Myb-related transcription factor OS=Komagataella pastoris (strain GS115 / ATCC 20864) GN=PAS_chr1-1_0039 PE=4 SV=1
Transcription factor involved in regulation of cell cycle progression from G1 to S phase OS=Komagataella pastoris (strain GS115 / ATCC 20864) GN=PAS_chr2-1_0508 PE=4 SV=1
Guanyl-nucleotide exchange factor for the small G-protein Sec4p OS=Komagataella pastoris (strain GS115 / ATCC 20864) GN=PAS_chr2-2_0014 PE=4 SV=1
GTP/GDP exchange factor for Rsr1p (Bud1p) required for both axial and bipolar budding patterns OS=Komagataella pastoris (strain GS115 / ATCC 20864) GN=PAS_chr3_0660 PE=4 SV=1
Putative uncharacterized protein OS=Komagataella pastoris (strain GS115 / ATCC 20864) GN=PAS_chr1-1_0320 PE=4 SV=1
Cytoplasmic aspartyl-tRNA synthetase, homodimeric enzyme OS=Komagataella pastoris (strain GS115 / ATCC 20864) GN=PAS_chr1-4_0095 PE=3 SV=1
Protein involved in ubiquitin ligation OS=Komagataella pastoris (strain GS115 / ATCC 20864) GN=PAS_chr3_0521 PE=4 SV=1
GTPase-activating protein OS=Komagataella pastoris (strain GS115 / ATCC 20864) GN=PAS_FragB_0038 PE=4 SV=1
Pyruvate kinase OS=Komagataella pastoris (strain GS115 / ATCC 20864) GN=PAS_chr2-1_0769 PE=3 SV=1
Glucose-6-phosphate 1-dehydrogenase OS=Komagataella pastoris (strain GS115 / ATCC 20864) GN=PAS_chr2-1_0308 PE=3 SV=1
Ceramide synthase component, involved in synthesis of ceramide OS=Komagataella pastoris (strain GS115 / ATCC 20864) GN=PAS_chr1-1_0358 PE=4 SV=1
Essential serine kinase involved in cell cycle progression and processing of the 20S pre-rRNA into m OS=Komagataella pastoris (strain GS115 / ATCC 20864) GN=PAS_chr3_0112 PE=4 SV=1
Putative uncharacterized protein OS=Komagataella pastoris (strain GS115 / ATCC 20864) GN=PAS_chr1-4_0057 PE=4 SV=1
Putative uncharacterized protein OS=Komagataella pastoris (strain GS115 / ATCC 20864) GN=PAS_chr2-2_0498 PE=4 SV=1
Plasma membrane ATP-binding cassette (ABC) transporter OS=Komagataella pastoris (strain GS115 / ATCC 20864) GN=PAS_chr4_0832 PE=3 SV=1
Protein component of the large (60S) ribosomal subunit OS=Komagataella pastoris (strain GS115 / ATCC 20864) GN=PAS_chr4_0131 PE=4 SV=1
Member of the imitation-switch (ISWI) class of ATP-dependent chromatin remodeling complexes OS=Komagataella pastoris (strain GS115 / ATCC 20864) GN=PAS_chr4_0128 PE=4 SV=1
Transcriptional modulator OS=Komagataella pastoris (strain GS115 / ATCC 20864) GN=PAS_chr1-4_0492 PE=4 SV=1
Acetylated, cis-golgi localized protein involved in ER to Golgi transport OS=Komagataella pastoris (strain GS115 / ATCC 20864) GN=PAS_chr4_0868 PE=4 SV=1
Glycogen synthase, similar to Gsy1p OS=Komagataella pastoris (strain GS115 / ATCC 20864) GN=PAS_chr3_0781 PE=4 SV=1
Putative uncharacterized protein OS=Komagataella pastoris (strain GS115 / ATCC 20864) GN=PAS_chr3_0607 PE=4 SV=1
One of two type I myosins OS=Komagataella pastoris (strain GS115 / ATCC 20864) GN=PAS_chr4_0618 PE=4 SV=1
Pleckstrin homology domain containing protein proposed to function as a glycerol channel activator OS=Komagataella pastoris (strain GS115 / ATCC 20864) GN=PAS_chr2-1_0479 PE=4 SV=1
L-homoserine-O-acetyltransferase, catalyzes the conversion of homoserine to O-acetyl homoserine OS=Komagataella pastoris (strain GS115 / ATCC 20864) GN=PAS_chr4_0865 PE=4 SV=1
Essential RNA-binding G protein effector of mating response pathway OS=Komagataella pastoris (strain GS115 / ATCC 20864) GN=PAS_chr1-3_0045 PE=4 SV=1
Transcriptional repressor and activator OS=Komagataella pastoris (strain GS115 / ATCC 20864) GN=PAS_chr3_0115 PE=3 SV=1
Putative uncharacterized protein OS=Komagataella pastoris (strain GS115 / ATCC 20864) GN=PAS_chr2-2_0468 PE=4 SV=1
Multidrug transporter of the major facilitator superfamily OS=Komagataella pastoris (strain GS115 / ATCC 20864) GN=PAS_chr1-4_0078 PE=4 SV=1
Essential protein required for determination of budding pattern OS=Komagataella pastoris (strain GS115 / ATCC 20864) GN=PAS_chr1-4_0128 PE=4 SV=1
Largest subunit of the origin recognition complex OS=Komagataella pastoris (strain GS115 / ATCC 20864) GN=PAS_chr4_0526 PE=4 SV=1
Putative uncharacterized protein OS=Komagataella pastoris (strain GS115 / ATCC 20864) GN=PAS_chr2-1_0527 PE=4 SV=1
Component of the ESCRT-I complex (Stp22p, Srn2p, Vps28p, and Mvb12p), which is involved in ubiquitin OS=Komagataella pastoris (strain GS115 / ATCC 20864) GN=PAS_chr2-1_0182 PE=4 SV=1
Histone methyltransferase OS=Komagataella pastoris (strain GS115 / ATCC 20864) GN=PAS_chr1-4_0287 PE=4 SV=1
L-ornithine transaminase (OTAse) OS=Komagataella pastoris (strain GS115 / ATCC 20864) GN=PAS_chr3_0410 PE=3 SV=1
Basic leucine zipper (BZIP) transcription factor of the ATF/CREB family, activates transcription of OS=Komagataella pastoris (strain GS115 / ATCC 20864) GN=PAS_chr3_0135 PE=4 SV=1
MAP kinase kinase kinase of the HOG1 mitogen-activated signaling pathway OS=Komagataella pastoris (strain GS115 / ATCC 20864) GN=PAS_chr1-4_0279 PE=4 SV=1
Vesicular-fusion protein SEC17 OS=Komagataella pastoris (strain GS115 / ATCC 20864) GN=SEC17 PE=3 SV=2
Sterol 3-beta-glucosyltransferase OS=Komagataella pastoris (strain GS115 / ATCC 20864) GN=ATG26 PE=3 SV=1
ATP-binding protein required for mismatch repair in mitosis and meiosis OS=Komagataella pastoris (strain GS115 / ATCC 20864) GN=PAS_chr4_0124 PE=4 SV=1
Mitogen-activated kinase kinase involved in protein kinase C signaling pathway OS=Komagataella pastoris (strain GS115 / ATCC 20864) GN=PAS_chr1-4_0271 PE=4 SV=1
Polyphosphatidylinositol phosphatase, dephosphorylates multiple phosphatidylinositols OS=Komagataella pastoris (strain GS115 / ATCC 20864) GN=PAS_chr2-1_0178 PE=4 SV=1
Putative uncharacterized protein OS=Komagataella pastoris (strain GS115 / ATCC 20864) GN=PAS_chr3_0055 PE=4 SV=1
Putative uncharacterized protein OS=Komagataella pastoris (strain GS115 / ATCC 20864) GN=PAS_chr3_1034 PE=4 SV=1
Uncharacterized protein OS=Komagataella pastoris (strain GS115 / ATCC 20864) GN=PAS_chr4_0176 PE=4 SV=1
Putative uncharacterized protein OS=Komagataella pastoris (strain GS115 / ATCC 20864) GN=PAS_chr1-3_0179 PE=4 SV=1
Cytoplasmic protein required for replication of Brome mosaic virus in S. cerevisiae OS=Komagataella pastoris (strain GS115 / ATCC 20864) GN=PAS_chr3_0682 PE=4 SV=1
Protein with DNA-dependent ATPase and ssDNA annealing activities involved in maintenance of genome OS=Komagataella pastoris (strain GS115 / ATCC 20864) GN=PAS_chr2-2_0287 PE=4 SV=1
Putative uncharacterized protein OS=Komagataella pastoris (strain GS115 / ATCC 20864) GN=PAS_chr3_1182 PE=4 SV=1
Uncharacterized protein OS=Komagataella pastoris (strain GS115 / ATCC 20864) GN=PAS_chr4_0340 PE=4 SV=1
Putative uncharacterized protein OS=Komagataella pastoris (strain GS115 / ATCC 20864) GN=PAS_chr1-1_0204 PE=4 SV=1
Aminomethyltransferase OS=Komagataella pastoris (strain GS115 / ATCC 20864) GN=PAS_chr2-2_0492 PE=3 SV=1
Putative uncharacterized protein OS=Komagataella pastoris (strain GS115 / ATCC 20864) GN=PAS_chr3_0383 PE=4 SV=1
MAP kinase kinase that plays a pivotal role in the osmosensing signal-transduction pathway OS=Komagataella pastoris (strain GS115 / ATCC 20864) GN=PAS_chr1-1_0105 PE=4 SV=1
Rho GTPase activating protein (RhoGAP) involved in control of the cytoskeleton organization OS=Komagataella pastoris (strain GS115 / ATCC 20864) GN=PAS_chr1-4_0424 PE=4 SV=1
Putative uncharacterized protein OS=Komagataella pastoris (strain GS115 / ATCC 20864) GN=PAS_chr2-2_0226 PE=4 SV=1
Putative uncharacterized protein OS=Komagataella pastoris (strain GS115 / ATCC 20864) GN=PAS_chr3_0557 PE=4 SV=1
Minor isoform of tropomyosin, binds to and stabilizes actin cables and filaments OS=Komagataella pastoris (strain GS115 / ATCC 20864) GN=PAS_chr4_0115 PE=4 SV=1
Phosphoglycerate kinase OS=Komagataella pastoris (strain GS115 / ATCC 20864) GN=PAS_chr1-4_0292 PE=3 SV=1
Primary rRNA-binding ribosomal protein component of the large (60S) ribosomal subunit OS=Komagataella pastoris (strain GS115 / ATCC 20864) GN=PAS_chr4_0814 PE=3 SV=1
Uncharacterized protein OS=Komagataella pastoris (strain GS115 / ATCC 20864) GN=PAS_chr4_0986 PE=3 SV=1
Cell-cycle checkpoint serine-threonine kinase OS=Komagataella pastoris (strain GS115 / ATCC 20864) GN=PAS_chr2-2_0040 PE=4 SV=1
Uncharacterized protein OS=Komagataella pastoris (strain GS115 / ATCC 20864) GN=PAS_chr4_0948 PE=4 SV=1
Putative uncharacterized protein OS=Komagataella pastoris (strain GS115 / ATCC 20864) GN=PAS_chr2-1_0254 PE=4 SV=1
Membrane-associated protein OS=Komagataella pastoris (strain GS115 / ATCC 20864) GN=PAS_chr1-4_0606 PE=4 SV=1
Poly(A) binding protein, part of the 3~-end RNA-processing complex OS=Komagataella pastoris (strain GS115 / ATCC 20864) GN=PAS_chr1-4_0283 PE=4 SV=1
Putative uncharacterized protein OS=Komagataella pastoris (strain GS115 / ATCC 20864) GN=PAS_chr2-1_0566 PE=4 SV=1
Dynamin-related GTPase OS=Komagataella pastoris (strain GS115 / ATCC 20864) GN=PAS_chr3_0751 PE=3 SV=1
GTPase OS=Komagataella pastoris (strain GS115 / ATCC 20864) GN=PAS_chr1-1_0254 PE=4 SV=1
Clathrin light chain OS=Komagataella pastoris (strain GS115 / ATCC 20864) GN=PAS_chr1-4_0158 PE=4 SV=1
Putative uncharacterized protein OS=Komagataella pastoris (strain GS115 / ATCC 20864) GN=PAS_chr3_1017 PE=4 SV=1
Transporter of thiamine or related compound OS=Komagataella pastoris (strain GS115 / ATCC 20864) GN=PAS_chr3_0649 PE=4 SV=1
Ubiquitin-specific protease that deubiquitinates ubiquitin-protein moieties OS=Komagataella pastoris (strain GS115 / ATCC 20864) GN=PAS_chr1-3_0108 PE=4 SV=1
Transcription coactivator, component of the ADA and SAGA transcriptional adaptor/HAT complexes OS=Komagataella pastoris (strain GS115 / ATCC 20864) GN=PAS_chr2-1_0780 PE=4 SV=1
Uncharacterized protein OS=Komagataella pastoris (strain GS115 / ATCC 20864) GN=PAS_chr4_0635 PE=4 SV=1
Amidophosphoribosyltransferase OS=Komagataella pastoris (strain GS115 / ATCC 20864) GN=PAS_chr1-1_0430 PE=3 SV=1
Uncharacterized protein OS=Komagataella pastoris (strain GS115 / ATCC 20864) GN=PAS_chr4_0935 PE=4 SV=1
Putative uncharacterized protein OS=Komagataella pastoris (strain GS115 / ATCC 20864) GN=PAS_chr2-2_0177 PE=4 SV=1
Putative uncharacterized protein OS=Komagataella pastoris (strain GS115 / ATCC 20864) GN=PAS_chr3_0132 PE=4 SV=1
Putative uncharacterized protein OS=Komagataella pastoris (strain GS115 / ATCC 20864) GN=PAS_chr1-3_0165 PE=4 SV=1
Protein involved in glycosylphosphatidylinositol (GPI) anchor synthesis OS=Komagataella pastoris (strain GS115 / ATCC 20864) GN=PAS_chr2-2_0076 PE=4 SV=1
Endosomal protein that regulates cell polarity, controls polarized growth OS=Komagataella pastoris (strain GS115 / ATCC 20864) GN=PAS_chr4_0430 PE=4 SV=1
Putative uncharacterized protein OS=Komagataella pastoris (strain GS115 / ATCC 20864) GN=PAS_chr2-1_0288 PE=4 SV=1
Small subunit of the ribonucleotide-diphosphate reductase (RNR) complex OS=Komagataella pastoris (strain GS115 / ATCC 20864) GN=PAS_chr4_0197 PE=4 SV=1
Putative uncharacterized protein OS=Komagataella pastoris (strain GS115 / ATCC 20864) GN=PAS_chr2-1_0726 PE=4 SV=1
Na+/H+ antiporter involved in sodium and potassium efflux through the plasma membrane OS=Komagataella pastoris (strain GS115 / ATCC 20864) GN=PAS_chr3_0409 PE=4 SV=1
Regulatory, non-ATPase subunit of the 26S proteasome OS=Komagataella pastoris (strain GS115 / ATCC 20864) GN=PAS_chr1-4_0478 PE=4 SV=1
Transmembrane actin-binding protein involved in membrane cytoskeleton assembly and cell polarization OS=Komagataella pastoris (strain GS115 / ATCC 20864) GN=PAS_chr4_0879 PE=4 SV=1
Putative transcription factor OS=Komagataella pastoris (strain GS115 / ATCC 20864) GN=PAS_FragB_0066 PE=4 SV=1
GDP-mannose pyrophosphorylase (Mannose-1-phosphate guanyltransferase), synthesizes GDP-mannose from OS=Komagataella pastoris (strain GS115 / ATCC 20864) GN=PAS_chr2-1_0093 PE=4 SV=1
Protein involved in transcription initiation at TATA-containing promoters OS=Komagataella pastoris (strain GS115 / ATCC 20864) GN=PAS_chr1-4_0220 PE=4 SV=1
Cytoplasmic inorganic pyrophosphatase (PPase) OS=Komagataella pastoris (strain GS115 / ATCC 20864) GN=PAS_chr1-3_0028 PE=4 SV=1
Peptidyl-prolyl isomerase OS=Komagataella pastoris (strain GS115 / ATCC 20864) GN=PAS_c034_0039 PE=3 SV=1
Putative uncharacterized protein OS=Komagataella pastoris (strain GS115 / ATCC 20864) GN=PAS_chr2-2_0442 PE=4 SV=1
Putative uncharacterized protein OS=Komagataella pastoris (strain GS115 / ATCC 20864) GN=PAS_chr2-1_0077 PE=4 SV=1
Putative uncharacterized protein OS=Komagataella pastoris (strain GS115 / ATCC 20864) GN=PAS_c121_0004 PE=4 SV=1
Type 2C protein phosphatase OS=Komagataella pastoris (strain GS115 / ATCC 20864) GN=PAS_chr2-2_0216 PE=3 SV=1
Uncharacterized protein OS=Komagataella pastoris (strain GS115 / ATCC 20864) GN=PAS_chr4_0743 PE=4 SV=1
Transcription factor (BHLH) involved in interorganelle communication OS=Komagataella pastoris (strain GS115 / ATCC 20864) GN=PAS_chr1-1_0371 PE=4 SV=1
SH3 domain protein implicated in the regulation of actin polymerization OS=Komagataella pastoris (strain GS115 / ATCC 20864) GN=PAS_chr4_0215 PE=4 SV=1
Formin, nucleates the formation of linear actin filaments OS=Komagataella pastoris (strain GS115 / ATCC 20864) GN=PAS_chr4_0636 PE=4 SV=1
Component of the Rsp5p E3-ubiquitin ligase complex OS=Komagataella pastoris (strain GS115 / ATCC 20864) GN=PAS_chr2-2_0023 PE=4 SV=1
Homocitrate synthase isozyme, catalyzes the condensation of acetyl-CoA and alpha-ketoglutarate OS=Komagataella pastoris (strain GS115 / ATCC 20864) GN=PAS_chr1-4_0421 PE=3 SV=1
Regulatory subunit of type 1 protein phosphatase Glc7p OS=Komagataella pastoris (strain GS115 / ATCC 20864) GN=PAS_chr1-1_0078 PE=4 SV=1
Putative uncharacterized protein OS=Komagataella pastoris (strain GS115 / ATCC 20864) GN=PAS_chr1-4_0402 PE=4 SV=1
Uncharacterized protein OS=Komagataella pastoris (strain GS115 / ATCC 20864) GN=PAS_chr4_0977 PE=4 SV=1
Component of the CCR4-NOT complex, which has multiple roles in regulating mRNA levels OS=Komagataella pastoris (strain GS115 / ATCC 20864) GN=PAS_chr4_0431 PE=4 SV=1
Putative uncharacterized protein OS=Komagataella pastoris (strain GS115 / ATCC 20864) GN=PAS_chr2-1_0008 PE=4 SV=1
Nuclear thiol peroxidase, functions as an alkyl-hydroperoxide reductase during post-diauxic growth OS=Komagataella pastoris (strain GS115 / ATCC 20864) GN=PAS_chr1-1_0155 PE=4 SV=1
Putative uncharacterized protein OS=Komagataella pastoris (strain GS115 / ATCC 20864) GN=PAS_FragB_0043 PE=4 SV=1
Putative uncharacterized protein OS=Komagataella pastoris (strain GS115 / ATCC 20864) GN=PAS_chr2-1_0830 PE=4 SV=1
Putative uncharacterized protein OS=Komagataella pastoris (strain GS115 / ATCC 20864) GN=PAS_chr1-4_0155 PE=4 SV=1
Putative uncharacterized protein OS=Komagataella pastoris (strain GS115 / ATCC 20864) GN=PAS_chr2-1_0809 PE=3 SV=1
Ribonucleoside-diphosphate reductase OS=Komagataella pastoris (strain GS115 / ATCC 20864) GN=PAS_chr1-1_0282 PE=3 SV=1
ATP-dependent RNA helicase OS=Komagataella pastoris (strain GS115 / ATCC 20864) GN=PAS_chr1-1_0061 PE=4 SV=1
Putative uncharacterized protein OS=Komagataella pastoris (strain GS115 / ATCC 20864) GN=PAS_c131_0004 PE=4 SV=1
Putative uncharacterized protein OS=Komagataella pastoris (strain GS115 / ATCC 20864) GN=PAS_chr3_1173 PE=4 SV=1
Putative uncharacterized protein OS=Komagataella pastoris (strain GS115 / ATCC 20864) GN=PAS_chr3_0514 PE=4 SV=1
Protein involved in clathrin cage assembly OS=Komagataella pastoris (strain GS115 / ATCC 20864) GN=PAS_chr2-2_0405 PE=4 SV=1
Putative uncharacterized protein OS=Komagataella pastoris (strain GS115 / ATCC 20864) GN=PAS_chr1-4_0682 PE=4 SV=1
Putative uncharacterized protein OS=Komagataella pastoris (strain GS115 / ATCC 20864) GN=PAS_chr1-1_0133 PE=4 SV=1
Protein required for beta-1,6 glucan biosynthesis OS=Komagataella pastoris (strain GS115 / ATCC 20864) GN=PAS_chr3_0929 PE=4 SV=1
Tubulin gamma chain OS=Komagataella pastoris (strain GS115 / ATCC 20864) GN=PAS_chr4_0148 PE=3 SV=1
PIK-related protein kinase and rapamycin target OS=Komagataella pastoris (strain GS115 / ATCC 20864) GN=PAS_chr2-1_0557 PE=4 SV=1
Ran GTPase binding protein OS=Komagataella pastoris (strain GS115 / ATCC 20864) GN=PAS_chr4_0817 PE=4 SV=1
Putative uncharacterized protein OS=Komagataella pastoris (strain GS115 / ATCC 20864) GN=PAS_chr3_1211 PE=4 SV=1
Saccharopine dehydrogenase [NAD(+), L-lysine-forming] OS=Komagataella pastoris (strain GS115 / ATCC 20864) GN=PAS_chr1-1_0447 PE=3 SV=1
Suppressor protein STM1 OS=Komagataella pastoris (strain GS115 / ATCC 20864) GN=PAS_chr1-4_0297 PE=4 SV=1
Putative uncharacterized protein OS=Komagataella pastoris (strain GS115 / ATCC 20864) GN=PAS_chr1-1_0351 PE=4 SV=1
Peroxisomal membrane peroxin that is a central component of the peroxisomal protein import machinery OS=Komagataella pastoris (strain GS115 / ATCC 20864) GN=PAS_chr4_0794 PE=4 SV=1
Putative uncharacterized protein OS=Komagataella pastoris (strain GS115 / ATCC 20864) GN=PAS_chr1-1_0402 PE=4 SV=1
Cytoplasmic tyrosyl-tRNA synthetase, class I aminoacyl-tRNA synthetase OS=Komagataella pastoris (strain GS115 / ATCC 20864) GN=PAS_chr4_0522 PE=4 SV=1
Plasma membrane protein that may be involved in osmotolerance OS=Komagataella pastoris (strain GS115 / ATCC 20864) GN=PAS_chr2-1_0501 PE=4 SV=1
Mitochondrial ribosomal protein of the large subunit OS=Komagataella pastoris (strain GS115 / ATCC 20864) GN=PAS_chr4_0388 PE=4 SV=1
Protein component of the large (60S) ribosomal subunit OS=Komagataella pastoris (strain GS115 / ATCC 20864) GN=PAS_chr4_0267 PE=3 SV=1
RNA polymerase III subunit C82 OS=Komagataella pastoris (strain GS115 / ATCC 20864) GN=PAS_chr2-2_0431 PE=4 SV=1
Ubiquitin-conjugating enzyme that mediates selective degradation of short-lived and abnormal protein OS=Komagataella pastoris (strain GS115 / ATCC 20864) GN=PAS_chr4_0429 PE=3 SV=1
Synaptobrevin homolog 2 OS=Komagataella pastoris (strain GS115 / ATCC 20864) GN=PAS_FragB_0011 PE=4 SV=1
Putative uncharacterized protein OS=Komagataella pastoris (strain GS115 / ATCC 20864) GN=PAS_chr1-1_0260 PE=4 SV=1
Putative uncharacterized protein OS=Komagataella pastoris (strain GS115 / ATCC 20864) GN=PAS_chr2-2_0268 PE=4 SV=1
Uncharacterized protein OS=Komagataella pastoris (strain GS115 / ATCC 20864) GN=PAS_chr4_0979 PE=4 SV=1
Myosin-like protein associated with the nuclear envelope OS=Komagataella pastoris (strain GS115 / ATCC 20864) GN=PAS_chr4_0316 PE=4 SV=1
Chorismate mutase, catalyzes the conversion of chorismate to prephenate OS=Komagataella pastoris (strain GS115 / ATCC 20864) GN=PAS_chr4_0050 PE=4 SV=1
Subunit 2 of the ubiquinol cytochrome-c reductase complex OS=Komagataella pastoris (strain GS115 / ATCC 20864) GN=PAS_chr2-2_0430 PE=4 SV=1
Specificity factor required for Rsp5p-dependent ubiquitination OS=Komagataella pastoris (strain GS115 / ATCC 20864) GN=PAS_chr2-2_0042 PE=4 SV=1
Inositol hexakisphosphate and inositol heptakisphosphate kinase OS=Komagataella pastoris (strain GS115 / ATCC 20864) GN=PAS_chr1-1_0005 PE=4 SV=1
Putative uncharacterized protein OS=Komagataella pastoris (strain GS115 / ATCC 20864) GN=PAS_chr2-2_0120 PE=4 SV=1
Defining member of the SET3 histone deacetylase complex OS=Komagataella pastoris (strain GS115 / ATCC 20864) GN=PAS_chr1-3_0037 PE=4 SV=1
Protein involved in negative regulation of transcription of iron regulon OS=Komagataella pastoris (strain GS115 / ATCC 20864) GN=PAS_chr1-1_0111 PE=3 SV=1
Serine/threonine MAP kinase OS=Komagataella pastoris (strain GS115 / ATCC 20864) GN=PAS_chr3_0895 PE=4 SV=1
Putative uncharacterized protein OS=Komagataella pastoris (strain GS115 / ATCC 20864) GN=PAS_chr3_1258 PE=4 SV=1
Putative uncharacterized protein OS=Komagataella pastoris (strain GS115 / ATCC 20864) GN=PAS_chr1-4_0290 PE=4 SV=1
Subunit of the CCR4-NOT complex, which is a global transcriptional regulator with roles in transcrip OS=Komagataella pastoris (strain GS115 / ATCC 20864) GN=PAS_chr1-4_0152 PE=4 SV=1
Subunit of a replication-pausing checkpoint complex (Tof1p-Mrc1p-Csm3p) OS=Komagataella pastoris (strain GS115 / ATCC 20864) GN=PAS_chr2-2_0013 PE=4 SV=1
Uncharacterized protein OS=Komagataella pastoris (strain GS115 / ATCC 20864) GN=PAS_chr4_0678 PE=4 SV=1
Protein kinase of the PAK/Ste20 kinase family OS=Komagataella pastoris (strain GS115 / ATCC 20864) GN=PAS_chr3_0791 PE=4 SV=1
Subunit of the CCR4-NOT complex OS=Komagataella pastoris (strain GS115 / ATCC 20864) GN=PAS_FragD_0003 PE=4 SV=1
Putative uncharacterized protein OS=Komagataella pastoris (strain GS115 / ATCC 20864) GN=PAS_chr2-1_0871 PE=4 SV=1
Alpha subunit of the heteromeric nascent polypeptide-associated complex (NAC) OS=Komagataella pastoris (strain GS115 / ATCC 20864) GN=PAS_chr2-1_0755 PE=4 SV=1
Lipid-binding protein, localized to the bud via specific mRNA transport OS=Komagataella pastoris (strain GS115 / ATCC 20864) GN=PAS_chr1-1_0120 PE=4 SV=1
Putative uncharacterized protein OS=Komagataella pastoris (strain GS115 / ATCC 20864) GN=PAS_chr3_1043 PE=4 SV=1
Putative uncharacterized protein OS=Komagataella pastoris (strain GS115 / ATCC 20864) GN=PAS_chr3_1167 PE=3 SV=1
Polyamine transport protein, recognizes spermine, putrescine, and spermidine OS=Komagataella pastoris (strain GS115 / ATCC 20864) GN=PAS_chr4_0836 PE=4 SV=1
Amphiphysin-like lipid raft protein OS=Komagataella pastoris (strain GS115 / ATCC 20864) GN=PAS_chr3_0833 PE=4 SV=1
Putative uncharacterized protein OS=Komagataella pastoris (strain GS115 / ATCC 20864) GN=PAS_chr2-2_0025 PE=4 SV=1
Adenylyl cyclase-associated protein OS=Komagataella pastoris (strain GS115 / ATCC 20864) GN=PAS_chr2-2_0067 PE=3 SV=1
Long chain fatty acyl-CoA synthetase with a preference for C12:0-C16:0 fatty acids OS=Komagataella pastoris (strain GS115 / ATCC 20864) GN=PAS_chr2-1_0785 PE=4 SV=1
Putative uncharacterized protein OS=Komagataella pastoris (strain GS115 / ATCC 20864) GN=PAS_chr1-4_0321 PE=4 SV=1
Putative uncharacterized protein OS=Komagataella pastoris (strain GS115 / ATCC 20864) GN=PAS_chr1-1_0265 PE=4 SV=1
Plasma membrane ATP binding cassette (ABC) transporter OS=Komagataella pastoris (strain GS115 / ATCC 20864) GN=PAS_chr2-2_0299 PE=4 SV=1
Nicotinic acid mononucleotide adenylyltransferase, involved in pathways of NAD biosynthesis OS=Komagataella pastoris (strain GS115 / ATCC 20864) GN=PAS_chr1-4_0181 PE=4 SV=1
Phosphotyrosine-specific protein phosphatase OS=Komagataella pastoris (strain GS115 / ATCC 20864) GN=PAS_chr1-3_0061 PE=4 SV=1
Uncharacterized protein OS=Komagataella pastoris (strain GS115 / ATCC 20864) GN=PAS_chr4_0699 PE=4 SV=1
Fructose 1,6-bisphosphate aldolase, required for glycolysis and gluconeogenesis OS=Komagataella pastoris (strain GS115 / ATCC 20864) GN=PAS_chr1-1_0072 PE=4 SV=1
Protein component of the small (40S) ribosomal subunit OS=Komagataella pastoris (strain GS115 / ATCC 20864) GN=PAS_chr4_0456 PE=3 SV=1
SAGA-associated factor 11 OS=Komagataella pastoris (strain GS115 / ATCC 20864) GN=PAS_chr2-2_0251 PE=3 SV=1
Phosphatidylinositol 4-kinase OS=Komagataella pastoris (strain GS115 / ATCC 20864) GN=PAS_chr1-4_0380 PE=4 SV=1
G-protein beta subunit and guanine nucleotide dissociation inhibitor for Gpa2p OS=Komagataella pastoris (strain GS115 / ATCC 20864) GN=PAS_chr1-4_0063 PE=4 SV=1
Putative uncharacterized protein OS=Komagataella pastoris (strain GS115 / ATCC 20864) GN=PAS_chr1-3_0222 PE=4 SV=1
Putative uncharacterized protein OS=Komagataella pastoris (strain GS115 / ATCC 20864) GN=PAS_chr3_0416 PE=4 SV=1
40S small ribosomal subunit OS=Komagataella pastoris (strain GS115 / ATCC 20864) GN=PAS_chr1-4_0422 PE=3 SV=1
Putative uncharacterized protein OS=Komagataella pastoris (strain GS115 / ATCC 20864) GN=PAS_chr3_1158 PE=4 SV=1
Putative uncharacterized protein OS=Komagataella pastoris (strain GS115 / ATCC 20864) GN=PAS_chr2-1_0051 PE=4 SV=1
Putative uncharacterized protein OS=Komagataella pastoris (strain GS115 / ATCC 20864) GN=PAS_chr2-1_0742 PE=4 SV=1
Putative kinase, suppressor of GTPase mutant, similar to bovine rhodopsin kinase OS=Komagataella pastoris (strain GS115 / ATCC 20864) GN=PAS_chr2-1_0028 PE=4 SV=1
Protein chaperone involved in regulation of the HSP90 and HSP70 functions OS=Komagataella pastoris (strain GS115 / ATCC 20864) GN=PAS_chr2-2_0066 PE=3 SV=1
Pyridoxine (Pyridoxamine) phosphate oxidase, has homologs in E. coli and Myxococcus xanthus OS=Komagataella pastoris (strain GS115 / ATCC 20864) GN=PAS_chr1-1_0448 PE=3 SV=1
Uncharacterized protein OS=Komagataella pastoris (strain GS115 / ATCC 20864) GN=PAS_chr4_0999 PE=4 SV=1
Putative uncharacterized protein OS=Komagataella pastoris (strain GS115 / ATCC 20864) GN=PAS_chr3_1217 PE=4 SV=1
ATPase component of the RSC chromatin remodeling complex OS=Komagataella pastoris (strain GS115 / ATCC 20864) GN=PAS_chr2-2_0128 PE=4 SV=1
Subunit of the THO complex OS=Komagataella pastoris (strain GS115 / ATCC 20864) GN=PAS_chr1-1_0255 PE=4 SV=1
Catalytic epsilon subunit of the translation initiation factor eIF2B OS=Komagataella pastoris (strain GS115 / ATCC 20864) GN=PAS_chr3_0391 PE=4 SV=1
Putative uncharacterized protein OS=Komagataella pastoris (strain GS115 / ATCC 20864) GN=PAS_chr3_0772 PE=4 SV=1
Vacuolar membrane protein involved in vacuolar polyphosphate accumulation OS=Komagataella pastoris (strain GS115 / ATCC 20864) GN=PAS_chr2-1_0668 PE=4 SV=1
Xylulokinase, converts D-xylulose and ATP to xylulose 5-phosphate and ADP OS=Komagataella pastoris (strain GS115 / ATCC 20864) GN=PAS_chr1-1_0280 PE=4 SV=1
Protein involved in positive regulation of both 1,3-beta-glucan synthesis and the Pkc1p-MAPK pathway OS=Komagataella pastoris (strain GS115 / ATCC 20864) GN=PAS_chr3_0560 PE=4 SV=1
Protein involved in programmed cell death OS=Komagataella pastoris (strain GS115 / ATCC 20864) GN=PAS_chr1-1_0091 PE=4 SV=1
GTPase-activating protein (RhoGAP) for Cdc42p and Rho5p OS=Komagataella pastoris (strain GS115 / ATCC 20864) GN=PAS_chr4_0629 PE=4 SV=1
Divalent metal ion transporter involved in manganese homeostasis OS=Komagataella pastoris (strain GS115 / ATCC 20864) GN=PAS_chr1-4_0246 PE=3 SV=1
Mitogen-activated protein (MAP) kinase kinase kinase OS=Komagataella pastoris (strain GS115 / ATCC 20864) GN=PAS_chr3_0220 PE=4 SV=1
Putative uncharacterized protein OS=Komagataella pastoris (strain GS115 / ATCC 20864) GN=PAS_chr1-3_0040 PE=4 SV=1
Outer mitochondrial carnitine acetyltransferase, minor ethanol-inducible enzyme OS=Komagataella pastoris (strain GS115 / ATCC 20864) GN=PAS_chr1-4_0074 PE=3 SV=1
Ser-Thr protein kinase, member (With Ark1p and Prk1p) of the Ark kinase family OS=Komagataella pastoris (strain GS115 / ATCC 20864) GN=PAS_chr3_0940 PE=4 SV=1
Uncharacterized protein OS=Komagataella pastoris (strain GS115 / ATCC 20864) GN=PAS_chr4_0773 PE=4 SV=1
Uncharacterized protein OS=Komagataella pastoris (strain GS115 / ATCC 20864) GN=PAS_chr4_0461 PE=4 SV=1
Ubiquitin carboxyl-terminal hydrolase OS=Komagataella pastoris (strain GS115 / ATCC 20864) GN=PAS_chr1-1_0435 PE=3 SV=1
Uncharacterized protein OS=Komagataella pastoris (strain GS115 / ATCC 20864) GN=PAS_chr4_0320 PE=4 SV=1
Protein kinase implicated in activation of the plasma membrane H(+)-ATPase Pma1p OS=Komagataella pastoris (strain GS115 / ATCC 20864) GN=PAS_chr3_1091 PE=4 SV=1
TFIIE small subunit, involved in RNA polymerase II transcription initiation OS=Komagataella pastoris (strain GS115 / ATCC 20864) GN=PAS_chr3_0737 PE=4 SV=1
Putative uncharacterized protein OS=Komagataella pastoris (strain GS115 / ATCC 20864) GN=PAS_chr2-1_0879 PE=4 SV=1
Vacuolar transporter OS=Komagataella pastoris (strain GS115 / ATCC 20864) GN=PAS_chr3_0226 PE=4 SV=1
Multifunctional enzyme HIS4 OS=Komagataella pastoris (strain GS115 / ATCC 20864) GN=PAS_chr1-4_0160 PE=3 SV=1
Phosphatidylinositol transfer protein OS=Komagataella pastoris (strain GS115 / ATCC 20864) GN=PAS_chr1-4_0532 PE=4 SV=1
Uncharacterized protein OS=Komagataella pastoris (strain GS115 / ATCC 20864) GN=PAS_chr4_0655 PE=4 SV=1
Nuclear fusion protein BIK1 OS=Komagataella pastoris (strain GS115 / ATCC 20864) GN=PAS_chr1-4_0161 PE=4 SV=1
6-phosphofructo-2-kinase, inhibited by phosphoenolpyruvate and sn-glycerol 3-phosphate, has negligib OS=Komagataella pastoris (strain GS115 / ATCC 20864) GN=PAS_chr2-2_0060 PE=4 SV=1
Protein that localizes to the nucleus and is involved in transcription regulation OS=Komagataella pastoris (strain GS115 / ATCC 20864) GN=PAS_chr3_1109 PE=4 SV=1
Acetyl-CoA carboxylase, biotin containing enzyme OS=Komagataella pastoris (strain GS115 / ATCC 20864) GN=PAS_chr1-4_0249 PE=4 SV=1
Member of an oxysterol-binding protein family with seven members in S. cerevisiae OS=Komagataella pastoris (strain GS115 / ATCC 20864) GN=PAS_chr3_0421 PE=4 SV=1
Uncharacterized protein OS=Komagataella pastoris (strain GS115 / ATCC 20864) GN=PAS_chr4_0616 PE=4 SV=1
Putative uncharacterized protein OS=Komagataella pastoris (strain GS115 / ATCC 20864) GN=PAS_chr1-4_0137 PE=4 SV=1
High-affinity glucose transporter of the major facilitator superfamily OS=Komagataella pastoris (strain GS115 / ATCC 20864) GN=PAS_chr1-4_0570 PE=3 SV=1
Putative uncharacterized protein OS=Komagataella pastoris (strain GS115 / ATCC 20864) GN=PAS_c121_0009 PE=4 SV=1
RING finger protein involved in proteolytic control of sumoylated substrates OS=Komagataella pastoris (strain GS115 / ATCC 20864) GN=PAS_chr2-1_0447 PE=4 SV=1
Protein whose overexpression affects chromosome stability, potential Cdc28p substrate OS=Komagataella pastoris (strain GS115 / ATCC 20864) GN=PAS_chr1-1_0238 PE=4 SV=1
Essential abundant protein involved in regulation of transcription OS=Komagataella pastoris (strain GS115 / ATCC 20864) GN=PAS_chr2-2_0061 PE=4 SV=1
Nuclear pore complex subunit, part of a subcomplex also containing Nup53p, Nup170p, and Pse1p OS=Komagataella pastoris (strain GS115 / ATCC 20864) GN=PAS_chr4_0657 PE=4 SV=1
Cytochrome b-c1 complex subunit 7 OS=Komagataella pastoris (strain GS115 / ATCC 20864) GN=PAS_chr1-1_0322 PE=3 SV=1
Delta subunit of the coatomer complex (COPI), which coats Golgi-derived transport vesicles OS=Komagataella pastoris (strain GS115 / ATCC 20864) GN=PAS_chr1-1_0035 PE=4 SV=1
Protein with a potential role in actin cytoskeletal organization OS=Komagataella pastoris (strain GS115 / ATCC 20864) GN=PAS_chr3_0865 PE=4 SV=1
Uncharacterized protein OS=Komagataella pastoris (strain GS115 / ATCC 20864) GN=PAS_FragD_0020 PE=4 SV=1
Polyamine transport protein specific for spermine OS=Komagataella pastoris (strain GS115 / ATCC 20864) GN=PAS_chr1-4_0090 PE=4 SV=1
Trimethyl guanosine synthase, conserved nucleolar methyl transferase OS=Komagataella pastoris (strain GS115 / ATCC 20864) GN=PAS_chr4_0090 PE=4 SV=1
Reticulon-like protein OS=Komagataella pastoris (strain GS115 / ATCC 20864) GN=PAS_chr1-3_0230 PE=4 SV=1
Nucleolar protein, forms a complex with Noc4p OS=Komagataella pastoris (strain GS115 / ATCC 20864) GN=PAS_chr4_0512 PE=4 SV=1
Uncharacterized protein OS=Komagataella pastoris (strain GS115 / ATCC 20864) GN=PAS_chr4_0462 PE=4 SV=1
Protein kinase required for signal transduction during entry into meiosis OS=Komagataella pastoris (strain GS115 / ATCC 20864) GN=PAS_chr1-4_0368 PE=4 SV=1
Putative uncharacterized protein OS=Komagataella pastoris (strain GS115 / ATCC 20864) GN=PAS_chr1-4_0288 PE=4 SV=1
Serine/threonine-protein phosphatase OS=Komagataella pastoris (strain GS115 / ATCC 20864) GN=PAS_chr2-1_0407 PE=3 SV=1
Putative uncharacterized protein OS=Komagataella pastoris (strain GS115 / ATCC 20864) GN=PAS_chr3_1226 PE=4 SV=1
Chitin synthase III, catalyzes the transfer of N-acetylglucosamine (GlcNAc) to chitin OS=Komagataella pastoris (strain GS115 / ATCC 20864) GN=PAS_chr2-1_0065 PE=4 SV=1
ER membrane protein involved in a late step of glycosylphosphatidylinositol (GPI) anchor assembly OS=Komagataella pastoris (strain GS115 / ATCC 20864) GN=PAS_chr4_0652 PE=4 SV=1
Metalloprotease subunit of the 19S regulatory particle of the 26S proteasome lid OS=Komagataella pastoris (strain GS115 / ATCC 20864) GN=PAS_chr2-2_0341 PE=4 SV=1
Vacuolar protein sorting-associated protein 27 OS=Komagataella pastoris (strain GS115 / ATCC 20864) GN=PAS_FragB_0049 PE=4 SV=1
ATP-dependent DEAD (Asp-Glu-Ala-Asp)-box RNA helicase OS=Komagataella pastoris (strain GS115 / ATCC 20864) GN=PAS_chr4_0140 PE=4 SV=1
Putative uncharacterized protein OS=Komagataella pastoris (strain GS115 / ATCC 20864) GN=PAS_chr1-4_0631 PE=4 SV=1
Putative uncharacterized protein OS=Komagataella pastoris (strain GS115 / ATCC 20864) GN=PAS_chr1-1_0266 PE=4 SV=1
Guanine nucleotide exchange factor (GEF) OS=Komagataella pastoris (strain GS115 / ATCC 20864) GN=PAS_chr2-1_0586 PE=4 SV=1
Uncharacterized protein OS=Komagataella pastoris (strain GS115 / ATCC 20864) GN=PAS_chr4_0108 PE=4 SV=1
Putative uncharacterized protein OS=Komagataella pastoris (strain GS115 / ATCC 20864) GN=PAS_chr3_0477 PE=4 SV=1
Essential 88kDa subunit of the exocyst complex OS=Komagataella pastoris (strain GS115 / ATCC 20864) GN=PAS_chr1-4_0452 PE=4 SV=1
Component of the RSC chromatin remodeling complex OS=Komagataella pastoris (strain GS115 / ATCC 20864) GN=PAS_chr3_0544 PE=4 SV=1
Putative uncharacterized protein OS=Komagataella pastoris (strain GS115 / ATCC 20864) GN=PAS_chr1-3_0234 PE=4 SV=1
Protein implicated in polar growth, functionally redundant with Boi1p OS=Komagataella pastoris (strain GS115 / ATCC 20864) GN=PAS_chr1-3_0147 PE=4 SV=1
Lactose regulatory protein OS=Komagataella pastoris (strain GS115 / ATCC 20864) GN=PAS_FragB_0075 PE=4 SV=1
6-phosphogluconate dehydrogenase, decarboxylating OS=Komagataella pastoris (strain GS115 / ATCC 20864) GN=PAS_chr3_0277 PE=3 SV=1
Ribosomal protein 51 (Rp51) of the small (40s) subunit OS=Komagataella pastoris (strain GS115 / ATCC 20864) GN=PAS_chr2-1_0779 PE=3 SV=1
Cystathionine beta-synthase, catalyzes the synthesis of cystathionine from serine and homocysteine OS=Komagataella pastoris (strain GS115 / ATCC 20864) GN=PAS_chr2-2_0137 PE=4 SV=1
Component of the septin ring of the mother-bud neck that is required for cytokinesis OS=Komagataella pastoris (strain GS115 / ATCC 20864) GN=PAS_chr3_0967 PE=3 SV=1
Nucleosome remodeling factor that functions in regulation of transcription elongation OS=Komagataella pastoris (strain GS115 / ATCC 20864) GN=PAS_chr2-1_0095 PE=4 SV=1
Deletion suppressor of mpt5 mutation OS=Komagataella pastoris (strain GS115 / ATCC 20864) GN=PAS_chr2-1_0491 PE=4 SV=1
Putative uncharacterized protein OS=Komagataella pastoris (strain GS115 / ATCC 20864) GN=PAS_chr2-1_0253 PE=4 SV=1
Subunit of the NuA4 histone acetyltransferase complex that acetylates histone H4 and H2A OS=Komagataella pastoris (strain GS115 / ATCC 20864) GN=PAS_chr2-1_0321 PE=4 SV=1
Putative uncharacterized protein OS=Komagataella pastoris (strain GS115 / ATCC 20864) GN=PAS_chr3_0501 PE=4 SV=1
Putative uncharacterized protein OS=Komagataella pastoris (strain GS115 / ATCC 20864) GN=PAS_chr3_0806 PE=4 SV=1
Component of the ESCRT-I complex, which is involved in ubiquitin-dependent sorting of proteins into OS=Komagataella pastoris (strain GS115 / ATCC 20864) GN=PAS_chr3_0136 PE=4 SV=1
Phospholipase D, catalyzes the hydrolysis of phosphatidylcholine OS=Komagataella pastoris (strain GS115 / ATCC 20864) GN=PAS_chr3_0646 PE=4 SV=1
Putative uncharacterized protein OS=Komagataella pastoris (strain GS115 / ATCC 20864) GN=PAS_chr3_0258 PE=4 SV=1
Nucleolar protein, component of the small subunit (SSU) processome containing the U3 snoRNA OS=Komagataella pastoris (strain GS115 / ATCC 20864) GN=PAS_chr4_0667 PE=4 SV=1
Protein with an N-terminal kelch-like domain OS=Komagataella pastoris (strain GS115 / ATCC 20864) GN=PAS_chr4_0325 PE=4 SV=1
Protein kinase OS=Komagataella pastoris (strain GS115 / ATCC 20864) GN=PAS_chr4_0404 PE=4 SV=1
Putative uncharacterized protein OS=Komagataella pastoris (strain GS115 / ATCC 20864) GN=PAS_chr1-3_0169 PE=4 SV=1
Alkaline phosphatase OS=Komagataella pastoris (strain GS115 / ATCC 20864) GN=PAS_chr2-2_0084 PE=3 SV=1
Putative uncharacterized protein OS=Komagataella pastoris (strain GS115 / ATCC 20864) GN=PAS_chr3_0837 PE=4 SV=1
General repressor of transcription, forms complex with Cyc8p OS=Komagataella pastoris (strain GS115 / ATCC 20864) GN=PAS_chr3_1001 PE=4 SV=1
Uncharacterized protein OS=Komagataella pastoris (strain GS115 / ATCC 20864) GN=PAS_chr4_0024 PE=4 SV=1
Uncharacterized protein OS=Komagataella pastoris (strain GS115 / ATCC 20864) GN=PAS_FragD_0017 PE=4 SV=1
Ribosomal protein 59 of small subunit, required for ribosome assembly and 20S pre-rRNA processing OS=Komagataella pastoris (strain GS115 / ATCC 20864) GN=PAS_chr2-1_0481 PE=3 SV=1
Mg&lt;sup&gt2+&lt;/sup&gt-dependent phosphatidate (PA) phosphatase OS=Komagataella pastoris (strain GS115 / ATCC 20864) GN=PAS_chr3_0512 PE=4 SV=1
Putative uncharacterized protein OS=Komagataella pastoris (strain GS115 / ATCC 20864) GN=PAS_chr1-4_0486 PE=4 SV=1
Putative uncharacterized protein OS=Komagataella pastoris (strain GS115 / ATCC 20864) GN=PAS_c121_0008 PE=4 SV=1
Putative ATP-dependent RNA helicase, nucleolar protein OS=Komagataella pastoris (strain GS115 / ATCC 20864) GN=PAS_chr1-3_0272 PE=4 SV=1
Subunit E of the eight-subunit V1 peripheral membrane domain of the vacuolar H+-ATPase (V-ATPase) OS=Komagataella pastoris (strain GS115 / ATCC 20864) GN=PAS_chr3_0704 PE=3 SV=1
Guanine nucleotide exchange factor for ADP ribosylation factors (ARFs) OS=Komagataella pastoris (strain GS115 / ATCC 20864) GN=PAS_chr1-4_0432 PE=4 SV=1
Part of actin cytoskeleton-regulatory complex Pan1p-Sla1p-End3p OS=Komagataella pastoris (strain GS115 / ATCC 20864) GN=PAS_chr3_0694 PE=4 SV=1
Putative uncharacterized protein OS=Komagataella pastoris (strain GS115 / ATCC 20864) GN=PAS_chr2-1_0218 PE=4 SV=1
Putative uncharacterized protein OS=Komagataella pastoris (strain GS115 / ATCC 20864) GN=PAS_chr2-2_0455 PE=4 SV=1
General amino acid permease OS=Komagataella pastoris (strain GS115 / ATCC 20864) GN=PAS_chr1-1_0203 PE=4 SV=1
Putative uncharacterized protein OS=Komagataella pastoris (strain GS115 / ATCC 20864) GN=PAS_chr2-1_0812 PE=4 SV=1
Plasma membrane ATP binding cassette (ABC) transporter OS=Komagataella pastoris (strain GS115 / ATCC 20864) GN=PAS_chr1-1_0398 PE=3 SV=1
Protein tyrosine phosphatase involved in cell cycle control OS=Komagataella pastoris (strain GS115 / ATCC 20864) GN=PAS_chr1-1_0273 PE=4 SV=1
40S ribosomal protein S8 OS=Komagataella pastoris (strain GS115 / ATCC 20864) GN=PAS_chr1-1_0439 PE=3 SV=1
Subunit of the RNA polymerase II mediator complex OS=Komagataella pastoris (strain GS115 / ATCC 20864) GN=PAS_chr3_1134 PE=4 SV=1
Tyrosine phosphatase that plays a role in actin filament organization and endocytosis OS=Komagataella pastoris (strain GS115 / ATCC 20864) GN=PAS_chr2-2_0197 PE=4 SV=1
Putative uncharacterized protein OS=Komagataella pastoris (strain GS115 / ATCC 20864) GN=PAS_chr2-1_0444 PE=4 SV=1
Protein kinase OS=Komagataella pastoris (strain GS115 / ATCC 20864) GN=PAS_chr1-3_0106 PE=4 SV=1
Subunit of the anaphase-promoting complex/cyclosome (APC/C) OS=Komagataella pastoris (strain GS115 / ATCC 20864) GN=PAS_chr1-4_0197 PE=4 SV=1
UDP-glucose pyrophosphorylase (UGPase), catalyses the reversible formation of UDP-Glc OS=Komagataella pastoris (strain GS115 / ATCC 20864) GN=PAS_chr1-3_0122 PE=4 SV=1
Mu1-like medium subunit of the clathrin-associated protein complex (AP-1) OS=Komagataella pastoris (strain GS115 / ATCC 20864) GN=PAS_chr4_0852 PE=4 SV=1
Putative uncharacterized protein OS=Komagataella pastoris (strain GS115 / ATCC 20864) GN=PAS_chr1-1_0426 PE=4 SV=1
Putative uncharacterized protein OS=Komagataella pastoris (strain GS115 / ATCC 20864) GN=PAS_chr2-2_0231 PE=4 SV=1
Oxysterol-binding protein OS=Komagataella pastoris (strain GS115 / ATCC 20864) GN=PAS_chr1-4_0646 PE=3 SV=1
Heat shock protein OS=Komagataella pastoris (strain GS115 / ATCC 20864) GN=PAS_c034_0029 PE=3 SV=1
Negative regulatory subunit of the protein phosphatase 1 Ppz1p OS=Komagataella pastoris (strain GS115 / ATCC 20864) GN=PAS_chr3_1031 PE=4 SV=1
Activator of Chs3p (Chitin synthase III), recruits Chs3p to the bud neck via interaction with Bni4p OS=Komagataella pastoris (strain GS115 / ATCC 20864) GN=PAS_chr2-1_0261 PE=4 SV=1
Putative uncharacterized protein OS=Komagataella pastoris (strain GS115 / ATCC 20864) GN=PAS_chr3_1095 PE=4 SV=1
Putative uncharacterized protein OS=Komagataella pastoris (strain GS115 / ATCC 20864) GN=PAS_chr2-1_0432 PE=4 SV=1
Putative uncharacterized protein OS=Komagataella pastoris (strain GS115 / ATCC 20864) GN=PAS_chr2-2_0422 PE=4 SV=1
Uncharacterized protein OS=Komagataella pastoris (strain GS115 / ATCC 20864) GN=PAS_chr4_0235 PE=4 SV=1
Non-essential regulatory subunit B of protein phosphatase 2A, which has multiple roles in mitosis an OS=Komagataella pastoris (strain GS115 / ATCC 20864) GN=PAS_chr2-1_0362 PE=4 SV=1
Uncharacterized protein OS=Komagataella pastoris (strain GS115 / ATCC 20864) GN=PAS_chr4_0099 PE=4 SV=1
Putative uncharacterized protein OS=Komagataella pastoris (strain GS115 / ATCC 20864) GN=PAS_chr3_1254 PE=4 SV=1
Putative transcription factor containing a zinc finger OS=Komagataella pastoris (strain GS115 / ATCC 20864) GN=PAS_chr3_0407 PE=4 SV=1
Putative uncharacterized protein OS=Komagataella pastoris (strain GS115 / ATCC 20864) GN=PAS_chr3_1141 PE=4 SV=1
Vacuolar protein sorting protein OS=Komagataella pastoris (strain GS115 / ATCC 20864) GN=PAS_chr1-4_0657 PE=4 SV=1
Probable cochaperone, regulates activity of Cyr1p (Adenylyl cyclase) OS=Komagataella pastoris (strain GS115 / ATCC 20864) GN=PAS_chr2-1_0330 PE=4 SV=1
Mitochondrial succinate-fumarate transporter OS=Komagataella pastoris (strain GS115 / ATCC 20864) GN=PAS_chr4_0688 PE=3 SV=1
Uncharacterized protein OS=Komagataella pastoris (strain GS115 / ATCC 20864) GN=PAS_chr4_0916 PE=4 SV=1
Component of the mitotic exit network OS=Komagataella pastoris (strain GS115 / ATCC 20864) GN=PAS_chr1-4_0419 PE=4 SV=1
Autophagy-related protein 3 OS=Komagataella pastoris (strain GS115 / ATCC 20864) GN=PAS_chr3_0688 PE=3 SV=1
Putative uncharacterized protein OS=Komagataella pastoris (strain GS115 / ATCC 20864) GN=PAS_chr2-1_0132 PE=4 SV=1
Putative uncharacterized protein OS=Komagataella pastoris (strain GS115 / ATCC 20864) GN=PAS_chr1-3_0046 PE=4 SV=1
Metal resistance protein YCF1 OS=Komagataella pastoris (strain GS115 / ATCC 20864) GN=PAS_chr1-4_0619 PE=3 SV=1
Component of the U2 snRNP OS=Komagataella pastoris (strain GS115 / ATCC 20864) GN=PAS_chr1-1_0065 PE=4 SV=1
Putative uncharacterized protein OS=Komagataella pastoris (strain GS115 / ATCC 20864) GN=PAS_chr1-4_0550 PE=4 SV=1
DNA primase OS=Komagataella pastoris (strain GS115 / ATCC 20864) GN=PAS_chr4_0323 PE=3 SV=1
Peptidyl-prolyl cis-trans isomerase OS=Komagataella pastoris (strain GS115 / ATCC 20864) GN=PAS_chr2-2_0375 PE=4 SV=1
Putative uncharacterized protein OS=Komagataella pastoris (strain GS115 / ATCC 20864) GN=PAS_chr2-1_0827 PE=4 SV=1
Cis-golgi GTPase-activating protein (GAP) OS=Komagataella pastoris (strain GS115 / ATCC 20864) GN=PAS_chr1-3_0219 PE=4 SV=1
Uncharacterized protein OS=Komagataella pastoris (strain GS115 / ATCC 20864) GN=PAS_chr4_0504 PE=4 SV=1
Protein phosphatase required for mitotic exit OS=Komagataella pastoris (strain GS115 / ATCC 20864) GN=PAS_chr1-4_0081 PE=4 SV=1
Protein with a positive role in the multivesicular body sorting pathway OS=Komagataella pastoris (strain GS115 / ATCC 20864) GN=PAS_chr1-1_0369 PE=4 SV=1
Essential nucleolar protein that is a component of the SSU (Small subunit) processome OS=Komagataella pastoris (strain GS115 / ATCC 20864) GN=PAS_chr3_0683 PE=4 SV=1
Putative uncharacterized protein OS=Komagataella pastoris (strain GS115 / ATCC 20864) GN=PAS_chr3_0802 PE=4 SV=1
Acetohydroxyacid reductoisomerase OS=Komagataella pastoris (strain GS115 / ATCC 20864) GN=PAS_chr1-1_0432 PE=4 SV=1
Glycerol proton symporter of the plasma membrane, subject to glucose-induced inactivation OS=Komagataella pastoris (strain GS115 / ATCC 20864) GN=PAS_chr3_1099 PE=3 SV=1
Putative uncharacterized protein OS=Komagataella pastoris (strain GS115 / ATCC 20864) GN=PAS_chr3_1038 PE=4 SV=1
Putative uncharacterized protein OS=Komagataella pastoris (strain GS115 / ATCC 20864) GN=PAS_chr1-4_0530 PE=4 SV=1
Diacylglycerol kinase, localized to the endoplasmic reticulum (ER) OS=Komagataella pastoris (strain GS115 / ATCC 20864) GN=PAS_chr3_0072 PE=4 SV=1
Auxilin-like protein involved in vesicular transport OS=Komagataella pastoris (strain GS115 / ATCC 20864) GN=PAS_chr4_0746 PE=4 SV=1
Homo-isocitrate dehydrogenase, an NAD-linked mitochondrial enzyme OS=Komagataella pastoris (strain GS115 / ATCC 20864) GN=PAS_chr2-2_0168 PE=3 SV=1
Protein required for beta-1,6 glucan biosynthesis OS=Komagataella pastoris (strain GS115 / ATCC 20864) GN=PAS_chr4_0508 PE=4 SV=1
Putative uncharacterized protein OS=Komagataella pastoris (strain GS115 / ATCC 20864) GN=PAS_c121_0019 PE=4 SV=1
Putative uncharacterized protein OS=Komagataella pastoris (strain GS115 / ATCC 20864) GN=PAS_chr1-4_0658 PE=4 SV=1
Phosphoglucomutase, catalyzes interconversion of glucose-1-phosphate and glucose-6-phospate OS=Komagataella pastoris (strain GS115 / ATCC 20864) GN=PAS_chr2-1_0771 PE=3 SV=1
Pyruvate carboxylase OS=Komagataella pastoris (strain GS115 / ATCC 20864) GN=PAS_chr2-2_0024 PE=3 SV=1
Homocitrate synthase isozyme, catalyzes the condensation of acetyl-CoA and alpha-ketoglutarate OS=Komagataella pastoris (strain GS115 / ATCC 20864) GN=PAS_chr1-1_0313 PE=3 SV=1
Putative uncharacterized protein OS=Komagataella pastoris (strain GS115 / ATCC 20864) GN=PAS_chr2-1_0475 PE=4 SV=1
Protein related to mammalian high mobility group proteins OS=Komagataella pastoris (strain GS115 / ATCC 20864) GN=PAS_chr1-1_0442 PE=4 SV=1
Putative uncharacterized protein OS=Komagataella pastoris (strain GS115 / ATCC 20864) GN=PAS_chr3_0420 PE=4 SV=1
Beta-adaptin, large subunit of the clathrin associated protein complex (AP-2) OS=Komagataella pastoris (strain GS115 / ATCC 20864) GN=PAS_chr3_0079 PE=4 SV=1
DNA polymerase OS=Komagataella pastoris (strain GS115 / ATCC 20864) GN=PAS_chr2-2_0349 PE=3 SV=1
Glucose-6-phosphate isomerase OS=Komagataella pastoris (strain GS115 / ATCC 20864) GN=PAS_chr3_0456 PE=3 SV=1
Phosphoenolpyruvate carboxykinase OS=Komagataella pastoris (strain GS115 / ATCC 20864) GN=PAS_FragB_0061 PE=3 SV=1
Putative uncharacterized protein OS=Komagataella pastoris (strain GS115 / ATCC 20864) GN=PAS_chr2-2_0463 PE=4 SV=1
Target membrane receptor (T-SNARE) OS=Komagataella pastoris (strain GS115 / ATCC 20864) GN=PAS_chr2-2_0350 PE=4 SV=1
ATP-dependent RNA helicase of the SFI superfamily, required for nonsense mediated mRNA decay and for OS=Komagataella pastoris (strain GS115 / ATCC 20864) GN=PAS_chr3_0657 PE=4 SV=1
3-isopropylmalate dehydratase OS=Komagataella pastoris (strain GS115 / ATCC 20864) GN=PAS_chr2-1_0368 PE=3 SV=1
Uncharacterized protein OS=Komagataella pastoris (strain GS115 / ATCC 20864) GN=PAS_chr4_0851 PE=4 SV=1
N-terminally acetylated ribosomal protein L37 of the large (60S) ribosomal subunit OS=Komagataella pastoris (strain GS115 / ATCC 20864) GN=PAS_chr1-4_0275 PE=4 SV=1
General transcriptional co-repressor, acts together with Tup1p OS=Komagataella pastoris (strain GS115 / ATCC 20864) GN=PAS_chr2-1_0762 PE=4 SV=1
DNA-directed RNA polymerase OS=Komagataella pastoris (strain GS115 / ATCC 20864) GN=PAS_chr2-1_0125 PE=3 SV=1
Putative uncharacterized protein OS=Komagataella pastoris (strain GS115 / ATCC 20864) GN=PAS_chr2-1_0740 PE=4 SV=1
Autophagy-related protein 28 OS=Komagataella pastoris (strain GS115 / ATCC 20864) GN=ATG28 PE=1 SV=1
Component of the polarisome OS=Komagataella pastoris (strain GS115 / ATCC 20864) GN=PAS_chr3_0816 PE=4 SV=1
Uncharacterized protein OS=Komagataella pastoris (strain GS115 / ATCC 20864) GN=PAS_chr4_0721 PE=4 SV=1
Putative uncharacterized protein OS=Komagataella pastoris (strain GS115 / ATCC 20864) GN=PAS_FragB_0073 PE=4 SV=1
B-type regulatory subunit of protein phosphatase 2A (PP2A) OS=Komagataella pastoris (strain GS115 / ATCC 20864) GN=PAS_chr2-2_0274 PE=4 SV=1
Malate dehydrogenase OS=Komagataella pastoris (strain GS115 / ATCC 20864) GN=PAS_chr2-1_0238 PE=1 SV=1
Putative uncharacterized protein OS=Komagataella pastoris (strain GS115 / ATCC 20864) GN=PAS_chr2-2_0397 PE=4 SV=1
Putative uncharacterized protein OS=Komagataella pastoris (strain GS115 / ATCC 20864) GN=PAS_chr3_1023 PE=4 SV=1
Uncharacterized protein OS=Komagataella pastoris (strain GS115 / ATCC 20864) GN=PAS_chr4_0126 PE=4 SV=1
Uncharacterized protein OS=Komagataella pastoris (strain GS115 / ATCC 20864) GN=PAS_chr4_0989 PE=4 SV=1
Subunit of the Hat1p-Hat2p histone acetyltransferase complex OS=Komagataella pastoris (strain GS115 / ATCC 20864) GN=PAS_chr2-1_0271 PE=4 SV=1
Protein involved in the HOG (High osmolarity glycerol) pathway OS=Komagataella pastoris (strain GS115 / ATCC 20864) GN=PAS_chr1-3_0267 PE=4 SV=1
RNA helicase in the DEAD-box family, necessary for prespliceosome formation OS=Komagataella pastoris (strain GS115 / ATCC 20864) GN=PAS_chr3_0644 PE=4 SV=1
Putative uncharacterized protein OS=Komagataella pastoris (strain GS115 / ATCC 20864) GN=PAS_chr1-1_0471 PE=4 SV=1
Carnitine acetyltransferase OS=Komagataella pastoris (strain GS115 / ATCC 20864) GN=PAS_chr3_0761 PE=3 SV=1
Putative uncharacterized protein OS=Komagataella pastoris (strain GS115 / ATCC 20864) GN=PAS_chr3_1009 PE=4 SV=1
Mitotic spindle midzone localized microtubule-associated protein (MAP) family member OS=Komagataella pastoris (strain GS115 / ATCC 20864) GN=PAS_chr2-1_0331 PE=4 SV=1
Protein required for pre-rRNA processing and 40S ribosomal subunit assembly OS=Komagataella pastoris (strain GS115 / ATCC 20864) GN=PAS_chr3_0204 PE=4 SV=1
Subunit of the 26S proteasome, substrate of the N-acetyltransferase Nat1p OS=Komagataella pastoris (strain GS115 / ATCC 20864) GN=PAS_chr2-1_0656 PE=4 SV=1
Uncharacterized protein OS=Komagataella pastoris (strain GS115 / ATCC 20864) GN=PAS_chr4_0295 PE=4 SV=1
Component of a complex containing the Tor2p kinase and other proteins, which may have a role in regu OS=Komagataella pastoris (strain GS115 / ATCC 20864) GN=PAS_chr2-1_0241 PE=4 SV=1
Golgi matrix protein involved in the structural organization of the cis-Golgi OS=Komagataella pastoris (strain GS115 / ATCC 20864) GN=PAS_chr1-4_0268 PE=4 SV=1
Lysine--tRNA ligase OS=Komagataella pastoris (strain GS115 / ATCC 20864) GN=PAS_chr3_0949 PE=3 SV=1
Protein required for accurate chromosome segregation OS=Komagataella pastoris (strain GS115 / ATCC 20864) GN=PAS_chr1-1_0139 PE=4 SV=1
EH domain-containing protein OS=Komagataella pastoris (strain GS115 / ATCC 20864) GN=PAS_chr1-3_0032 PE=4 SV=1
Actin-and formin-interacting protein, involved in actin cable nucleation and polarized cell growth OS=Komagataella pastoris (strain GS115 / ATCC 20864) GN=PAS_chr2-1_0372 PE=4 SV=1
Evolutionarily conserved protein with similarity to Orm2p OS=Komagataella pastoris (strain GS115 / ATCC 20864) GN=PAS_chr4_0427 PE=4 SV=1
Serine/threonine protein kinase involved in regulation of exocytosis OS=Komagataella pastoris (strain GS115 / ATCC 20864) GN=PAS_chr3_0347 PE=4 SV=1
Putative uncharacterized protein OS=Komagataella pastoris (strain GS115 / ATCC 20864) GN=PAS_chr2-2_0454 PE=4 SV=1
Component of both the SWI/SNF and RSC chromatin remodeling complexes OS=Komagataella pastoris (strain GS115 / ATCC 20864) GN=PAS_chr2-1_0720 PE=3 SV=1
Uncharacterized protein OS=Komagataella pastoris (strain GS115 / ATCC 20864) GN=PAS_chr4_0410 PE=4 SV=1
Putative uncharacterized protein OS=Komagataella pastoris (strain GS115 / ATCC 20864) GN=PAS_chr2-1_0531 PE=4 SV=1
Putative uncharacterized protein OS=Komagataella pastoris (strain GS115 / ATCC 20864) GN=PAS_chr3_0666 PE=4 SV=1
Cleavage and polyadenylation factor I (CF I) component involved in cleavage and polyadenylation of m OS=Komagataella pastoris (strain GS115 / ATCC 20864) GN=PAS_chr2-1_0232 PE=4 SV=1
Putative uncharacterized protein OS=Komagataella pastoris (strain GS115 / ATCC 20864) GN=PAS_chr1-4_0140 PE=4 SV=1
Basic leucine zipper (BZIP) transcription factor required for oxidative stress tolerance OS=Komagataella pastoris (strain GS115 / ATCC 20864) GN=PAS_chr4_0601 PE=4 SV=1
Putative uncharacterized protein OS=Komagataella pastoris (strain GS115 / ATCC 20864) GN=PAS_chr1-4_0434 PE=4 SV=1
Putative uncharacterized protein OS=Komagataella pastoris (strain GS115 / ATCC 20864) GN=PAS_chr3_0773 PE=4 SV=1
Putative uncharacterized protein OS=Komagataella pastoris (strain GS115 / ATCC 20864) GN=PAS_chr3_1027 PE=4 SV=1
Putative uncharacterized protein OS=Komagataella pastoris (strain GS115 / ATCC 20864) GN=PAS_chr3_0504 PE=4 SV=1
Essential component of the nuclear pore complex OS=Komagataella pastoris (strain GS115 / ATCC 20864) GN=PAS_chr3_0524 PE=4 SV=1
Cytoplasmic component of the nuclear aminoacylation-dependent tRNA export pathway OS=Komagataella pastoris (strain GS115 / ATCC 20864) GN=PAS_chr4_0200 PE=4 SV=1
E1 alpha subunit of the pyruvate dehydrogenase (PDH) complex OS=Komagataella pastoris (strain GS115 / ATCC 20864) GN=PAS_chr2-2_0294 PE=4 SV=1
Putative uncharacterized protein OS=Komagataella pastoris (strain GS115 / ATCC 20864) GN=PAS_chr2-2_0419 PE=4 SV=1
Ubl (Ubiquitin-like protein)-specific protease that cleaves Smt3p protein conjugates OS=Komagataella pastoris (strain GS115 / ATCC 20864) GN=PAS_chr2-2_0097 PE=4 SV=1
Putative uncharacterized protein OS=Komagataella pastoris (strain GS115 / ATCC 20864) GN=PAS_chr1-4_0667 PE=4 SV=1
Uncharacterized protein OS=Komagataella pastoris (strain GS115 / ATCC 20864) GN=PAS_chr4_0260 PE=4 SV=1
Subunit beta1 of the nascent polypeptide-associated complex (NAC) involved in protein targeting OS=Komagataella pastoris (strain GS115 / ATCC 20864) GN=PAS_chr1-3_0172 PE=4 SV=1
SUMO/Smt3 ligase that promotes the attachment of sumo (Smt3p) OS=Komagataella pastoris (strain GS115 / ATCC 20864) GN=PAS_chr3_0129 PE=4 SV=1
Alpha 1,3 glucosyltransferase OS=Komagataella pastoris (strain GS115 / ATCC 20864) GN=PAS_chr2-1_0549 PE=4 SV=1
Constituent of Paf1 complex with RNA polymerase II, Paf1p, Hpr1p, Ctr9, Leo1, Rtf1 and Ccr4p OS=Komagataella pastoris (strain GS115 / ATCC 20864) GN=PAS_chr2-1_0674 PE=4 SV=1
Putative uncharacterized protein OS=Komagataella pastoris (strain GS115 / ATCC 20864) GN=PAS_chr1-1_0489 PE=4 SV=1
Putative uncharacterized protein OS=Komagataella pastoris (strain GS115 / ATCC 20864) GN=PAS_chr2-1_0260 PE=4 SV=1
Polo-like kinase with similarity to Xenopus Plx1 and S. pombe Plo1p OS=Komagataella pastoris (strain GS115 / ATCC 20864) GN=PAS_chr3_0243 PE=4 SV=1
Essential protein with similarity to phosducins, which are G-protein regulators OS=Komagataella pastoris (strain GS115 / ATCC 20864) GN=PAS_chr1-4_0342 PE=4 SV=1
Putative uncharacterized protein OS=Komagataella pastoris (strain GS115 / ATCC 20864) GN=PAS_chr2-2_0376 PE=4 SV=1
Putative uncharacterized protein OS=Komagataella pastoris (strain GS115 / ATCC 20864) GN=PAS_FragB_0072 PE=4 SV=1
3-deoxy-D-arabino-heptulosonate-7-phosphate (DAHP) synthase OS=Komagataella pastoris (strain GS115 / ATCC 20864) GN=PAS_chr2-1_0473 PE=4 SV=1
Putative uncharacterized protein OS=Komagataella pastoris (strain GS115 / ATCC 20864) GN=PAS_chr1-1_0185 PE=4 SV=1
Uncharacterized protein OS=Komagataella pastoris (strain GS115 / ATCC 20864) GN=PAS_chr4_0177 PE=4 SV=1
P-type ATPase sodium pump, involved in Na+ and Li+ efflux to allow salt tolerance OS=Komagataella pastoris (strain GS115 / ATCC 20864) GN=PAS_chr1-1_0428 PE=3 SV=1
Essential N-acetylglucosamine-phosphate mutase OS=Komagataella pastoris (strain GS115 / ATCC 20864) GN=PAS_chr1-1_0067 PE=3 SV=1
Membrane bound guanine nucleotide exchange factor (GEF or GDP-release factor) OS=Komagataella pastoris (strain GS115 / ATCC 20864) GN=PAS_chr1-4_0107 PE=4 SV=1
Type II myosin heavy chain, required for wild-type cytokinesis and cell separation OS=Komagataella pastoris (strain GS115 / ATCC 20864) GN=PAS_chr3_0823 PE=4 SV=1
DDK (Dbf4-dependent kinase) catalytic subunit OS=Komagataella pastoris (strain GS115 / ATCC 20864) GN=PAS_chr1-4_0192 PE=4 SV=1
Alpha subunit of fatty acid synthetase OS=Komagataella pastoris (strain GS115 / ATCC 20864) GN=PAS_chr1-4_0295 PE=3 SV=1
Subunit of the SWI/SNF chromatin remodeling complex OS=Komagataella pastoris (strain GS115 / ATCC 20864) GN=PAS_chr1-4_0309 PE=4 SV=1
Myo-inositol transporter with strong similarity to the major myo-inositol transporter Itr1p OS=Komagataella pastoris (strain GS115 / ATCC 20864) GN=PAS_chr2-1_0489 PE=3 SV=1
RNA-dependent ATPase RNA helicase (DEIH box) OS=Komagataella pastoris (strain GS115 / ATCC 20864) GN=PAS_chr1-4_0051 PE=4 SV=1
Multistep regulator of cAMP-PKA signaling OS=Komagataella pastoris (strain GS115 / ATCC 20864) GN=PAS_chr1-1_0042 PE=4 SV=1
Subunit of the RAVE complex (Rav1p, Rav2p, Skp1p), which promotes assembly of the V-ATPase holoenzym OS=Komagataella pastoris (strain GS115 / ATCC 20864) GN=PAS_chr2-1_0345 PE=4 SV=1
GTPase-activating protein (RhoGAP) for Rho3p and Rho4p OS=Komagataella pastoris (strain GS115 / ATCC 20864) GN=PAS_chr4_0681 PE=4 SV=1
Member of the PAK family of serine/threonine protein kinases with similarity to Ste20p and Cla4p OS=Komagataella pastoris (strain GS115 / ATCC 20864) GN=PAS_chr4_0313 PE=4 SV=1
Putative uncharacterized protein OS=Komagataella pastoris (strain GS115 / ATCC 20864) GN=PAS_chr1-1_0101 PE=4 SV=1
Putative uncharacterized protein OS=Komagataella pastoris (strain GS115 / ATCC 20864) GN=PAS_chr1-4_0628 PE=4 SV=1
Myosin-2 OS=Komagataella pastoris (strain GS115 / ATCC 20864) GN=PAS_FragB_0012 PE=4 SV=1
Calmodulin OS=Komagataella pastoris (strain GS115 / ATCC 20864) GN=PAS_chr2-1_0758 PE=4 SV=1
Putative uncharacterized protein OS=Komagataella pastoris (strain GS115 / ATCC 20864) GN=PAS_chr2-2_0307 PE=4 SV=1
Uncharacterized protein OS=Komagataella pastoris (strain GS115 / ATCC 20864) GN=PAS_chr4_0926 PE=4 SV=1
Putative ATPase of the AAA family OS=Komagataella pastoris (strain GS115 / ATCC 20864) GN=PAS_chr4_0241 PE=4 SV=1
Rho GTPase activating protein (RhoGAP) OS=Komagataella pastoris (strain GS115 / ATCC 20864) GN=PAS_chr2-2_0095 PE=4 SV=1
Component of the GARP (Golgi-associated retrograde protein) complex OS=Komagataella pastoris (strain GS115 / ATCC 20864) GN=PAS_chr1-1_0314 PE=4 SV=1
Putative uncharacterized protein OS=Komagataella pastoris (strain GS115 / ATCC 20864) GN=PAS_chr1-3_0265 PE=4 SV=1
Putative uncharacterized protein OS=Komagataella pastoris (strain GS115 / ATCC 20864) GN=PAS_chr3_0412 PE=4 SV=1
Positive regulator of genes in multiple nitrogen degradation pathways OS=Komagataella pastoris (strain GS115 / ATCC 20864) GN=PAS_chr1-4_0184 PE=4 SV=1
Nucleoporin involved in nucleocytoplasmic transport OS=Komagataella pastoris (strain GS115 / ATCC 20864) GN=PAS_chr2-2_0325 PE=4 SV=1
Subunit of the heterodimeric FACT complex (Spt16p-Pob3p) OS=Komagataella pastoris (strain GS115 / ATCC 20864) GN=PAS_chr1-1_0018 PE=4 SV=1
Putative uncharacterized protein OS=Komagataella pastoris (strain GS115 / ATCC 20864) GN=PAS_chr3_0530 PE=4 SV=1
Fimbrin, actin-bundling protein OS=Komagataella pastoris (strain GS115 / ATCC 20864) GN=PAS_chr2-1_0631 PE=4 SV=1
RNA binding protein with preference for single stranded tracts of U~s involved in synthesis of both OS=Komagataella pastoris (strain GS115 / ATCC 20864) GN=PAS_chr3_0065 PE=4 SV=1
60S acidic ribosomal protein P2-A OS=Komagataella pastoris (strain GS115 / ATCC 20864) GN=PAS_chr1-4_0490 PE=3 SV=1
Vacuolar transporter, exports large neutral amino acids from the vacuole OS=Komagataella pastoris (strain GS115 / ATCC 20864) GN=PAS_chr2-2_0343 PE=4 SV=1
Putative transcription factor involved in regulating the response to osmotic stress OS=Komagataella pastoris (strain GS115 / ATCC 20864) GN=PAS_chr4_0093 PE=3 SV=1
Component of the mitotic spindle that binds to interpolar microtubules OS=Komagataella pastoris (strain GS115 / ATCC 20864) GN=PAS_chr3_0913 PE=4 SV=1
Essential conserved nucleolar GTP-binding protein required for synthesis of 40S ribosomal subunits OS=Komagataella pastoris (strain GS115 / ATCC 20864) GN=PAS_chr1-1_0179 PE=4 SV=1
N-terminally acetylated protein component of the large (60S) ribosomal subunit, binds to 5.8 S rRNA OS=Komagataella pastoris (strain GS115 / ATCC 20864) GN=PAS_chr4_0208 PE=3 SV=1
Putative uncharacterized protein OS=Komagataella pastoris (strain GS115 / ATCC 20864) GN=PAS_chr3_0727 PE=4 SV=1
Uncharacterized protein OS=Komagataella pastoris (strain GS115 / ATCC 20864) GN=PAS_chr4_0333 PE=4 SV=1
Putative uncharacterized protein OS=Komagataella pastoris (strain GS115 / ATCC 20864) GN=PAS_chr1-4_0377 PE=4 SV=1
Uncharacterized protein OS=Komagataella pastoris (strain GS115 / ATCC 20864) GN=PAS_chr4_0257 PE=4 SV=1
Glc7-interacting protein whose overexpression relocalizes Glc7p from the nucleus OS=Komagataella pastoris (strain GS115 / ATCC 20864) GN=PAS_chr1-1_0346 PE=4 SV=1
Putative uncharacterized protein OS=Komagataella pastoris (strain GS115 / ATCC 20864) GN=PAS_chr3_0286 PE=4 SV=1
Ferrioxamine B transporter OS=Komagataella pastoris (strain GS115 / ATCC 20864) GN=PAS_chr3_0662 PE=4 SV=1
Putative uncharacterized protein OS=Komagataella pastoris (strain GS115 / ATCC 20864) GN=PAS_chr2-1_0151 PE=4 SV=1
Protein that interacts with Cdc48p and Npl4p, involved in recognition of polyubiquitinated proteins OS=Komagataella pastoris (strain GS115 / ATCC 20864) GN=PAS_chr1-1_0367 PE=4 SV=1
Protein serine/threonine/tyrosine (Dual-specificity) kinase OS=Komagataella pastoris (strain GS115 / ATCC 20864) GN=PAS_chr4_0812 PE=4 SV=1
Putative uncharacterized protein OS=Komagataella pastoris (strain GS115 / ATCC 20864) GN=PAS_chr2-1_0599 PE=4 SV=1
Conserved peptide N-glycanase required for deglycosylation of misfolded glycoproteins OS=Komagataella pastoris (strain GS115 / ATCC 20864) GN=PAS_chr1-3_0053 PE=4 SV=1
Ribosome biogenesis protein YTM1 OS=Komagataella pastoris (strain GS115 / ATCC 20864) GN=YTM1 PE=3 SV=1
Putative uncharacterized protein OS=Komagataella pastoris (strain GS115 / ATCC 20864) GN=PAS_chr1-1_0193 PE=4 SV=1
Protein component of the small (40S) ribosomal subunit OS=Komagataella pastoris (strain GS115 / ATCC 20864) GN=PAS_chr1-3_0115 PE=3 SV=1
Uncharacterized protein OS=Komagataella pastoris (strain GS115 / ATCC 20864) GN=PAS_chr4_0216 PE=4 SV=1
Putative uncharacterized protein OS=Komagataella pastoris (strain GS115 / ATCC 20864) GN=PAS_chr1-4_0375 PE=4 SV=1
Primary component of eisosomes OS=Komagataella pastoris (strain GS115 / ATCC 20864) GN=PAS_chr3_0227 PE=4 SV=1
GTPase activating protein (GAP) for Rho1p, involved in signaling to the actin cytoskeleton, null mut OS=Komagataella pastoris (strain GS115 / ATCC 20864) GN=PAS_chr2-1_0118 PE=4 SV=1
Aconitase, required for the tricarboxylic acid (TCA) cycle and also independently required for mitoc OS=Komagataella pastoris (strain GS115 / ATCC 20864) GN=PAS_chr1-3_0104 PE=4 SV=1
Integral plasma membrane protein required for axial budding in haploid cells OS=Komagataella pastoris (strain GS115 / ATCC 20864) GN=PAS_chr2-1_0700 PE=4 SV=1
Cytoplasmic ATPase that is a ribosome-associated molecular chaperone OS=Komagataella pastoris (strain GS115 / ATCC 20864) GN=PAS_chr3_0731 PE=3 SV=1
Protein required for normal mitochondrial morphology, has similarity to hemolysins OS=Komagataella pastoris (strain GS115 / ATCC 20864) GN=PAS_chr2-2_0173 PE=4 SV=1
Protein kinase involved in bud growth and assembly of the septin ring OS=Komagataella pastoris (strain GS115 / ATCC 20864) GN=PAS_chr1-1_0340 PE=4 SV=1
Putative uncharacterized protein OS=Komagataella pastoris (strain GS115 / ATCC 20864) GN=PAS_chr1-4_0693 PE=4 SV=1
Protein kinase with similarity to mammalian phosphoinositide-dependent kinase 1 (PDK1) OS=Komagataella pastoris (strain GS115 / ATCC 20864) GN=PAS_chr1-4_0069 PE=4 SV=1
Karyopherin, responsible for nuclear import of Spt15p, histones H2A and H2B, and Nap1p OS=Komagataella pastoris (strain GS115 / ATCC 20864) GN=PAS_chr1-4_0595 PE=4 SV=1
TFIID subunit (145 kDa) OS=Komagataella pastoris (strain GS115 / ATCC 20864) GN=PAS_chr1-4_0012 PE=4 SV=1
Uncharacterized protein OS=Komagataella pastoris (strain GS115 / ATCC 20864) GN=PAS_chr4_0713 PE=4 SV=1
Exonuclease component of the nuclear exosome OS=Komagataella pastoris (strain GS115 / ATCC 20864) GN=PAS_chr1-4_0108 PE=4 SV=1
GTPase-activating protein for the polarity-establishment protein Cdc42p OS=Komagataella pastoris (strain GS115 / ATCC 20864) GN=PAS_chr1-3_0159 PE=4 SV=1
Pyrroline-5-carboxylate reductase OS=Komagataella pastoris (strain GS115 / ATCC 20864) GN=PAS_chr4_0398 PE=3 SV=1
Component of the CCR4-NOT complex, which has multiple roles in regulating mRNA levels OS=Komagataella pastoris (strain GS115 / ATCC 20864) GN=PAS_chr2-1_0494 PE=4 SV=1
Putative uncharacterized protein OS=Komagataella pastoris (strain GS115 / ATCC 20864) GN=PAS_chr1-3_0181 PE=4 SV=1
Putative uncharacterized protein OS=Komagataella pastoris (strain GS115 / ATCC 20864) GN=PAS_chr1-3_0097 PE=4 SV=1
Translation initiation factor eIF-5 OS=Komagataella pastoris (strain GS115 / ATCC 20864) GN=PAS_chr4_0771 PE=4 SV=1
40S ribosomal protein S1 OS=Komagataella pastoris (strain GS115 / ATCC 20864) GN=RPS1 PE=3 SV=1
Essential phosphoprotein component (P150) of the COPII coat of secretory pathway vesicles OS=Komagataella pastoris (strain GS115 / ATCC 20864) GN=PAS_chr1-4_0231 PE=4 SV=1
Peroxisome biosynthesis protein PAS1 OS=Komagataella pastoris (strain GS115 / ATCC 20864) GN=PAS_chr3_1045 PE=4 SV=1
Putative uncharacterized protein OS=Komagataella pastoris (strain GS115 / ATCC 20864) GN=PAS_chr1-3_0096 PE=4 SV=1
Phosphatidylserine synthase, functions in phospholipid biosynthesis OS=Komagataella pastoris (strain GS115 / ATCC 20864) GN=PAS_chr1-1_0420 PE=3 SV=1
Putative uncharacterized protein OS=Komagataella pastoris (strain GS115 / ATCC 20864) GN=PAS_chr2-2_0072 PE=4 SV=1
AMP-activated serine/threonine protein kinase found in a complex containing Snf4p and members of the OS=Komagataella pastoris (strain GS115 / ATCC 20864) GN=PAS_chr2-1_0519 PE=4 SV=1
Uncharacterized protein OS=Komagataella pastoris (strain GS115 / ATCC 20864) GN=PAS_chr4_0617 PE=3 SV=1
Coproporphyrinogen III oxidase, an oxygen requiring enzyme OS=Komagataella pastoris (strain GS115 / ATCC 20864) GN=PAS_chr3_0943 PE=4 SV=1
Diacylglycerol acyltransferase OS=Komagataella pastoris (strain GS115 / ATCC 20864) GN=PAS_chr3_0218 PE=4 SV=1
Protein required for fusion of cvt-vesicles and autophagosomes with the vacuole OS=Komagataella pastoris (strain GS115 / ATCC 20864) GN=PAS_chr3_1107 PE=4 SV=1
Essential evolutionarily-conserved nucleolar protein component of the box C/D snoRNP complexes OS=Komagataella pastoris (strain GS115 / ATCC 20864) GN=PAS_chr1-4_0403 PE=4 SV=1
Oxidant-induced cell-cycle arrest protein 5 OS=Komagataella pastoris (strain GS115 / ATCC 20864) GN=OCA5 PE=3 SV=1
Nexin-1 homolog required for localizing membrane proteins OS=Komagataella pastoris (strain GS115 / ATCC 20864) GN=PAS_chr3_0990 PE=4 SV=1
Uncharacterized protein OS=Komagataella pastoris (strain GS115 / ATCC 20864) GN=PAS_chr4_0694 PE=4 SV=1
Essential protein involved in transcription regulation OS=Komagataella pastoris (strain GS115 / ATCC 20864) GN=PAS_chr4_0475 PE=4 SV=1
Uncharacterized protein OS=Komagataella pastoris (strain GS115 / ATCC 20864) GN=PAS_chr4_0980 PE=4 SV=1
Putative uncharacterized protein OS=Komagataella pastoris (strain GS115 / ATCC 20864) GN=PAS_chr2-1_0477 PE=4 SV=1
Uncharacterized protein OS=Komagataella pastoris (strain GS115 / ATCC 20864) GN=PAS_chr4_0605 PE=4 SV=1
Putative uncharacterized protein OS=Komagataella pastoris (strain GS115 / ATCC 20864) GN=PAS_chr1-4_0224 PE=4 SV=1
Serine esterase that deacylates exogenous lysophospholipids OS=Komagataella pastoris (strain GS115 / ATCC 20864) GN=PAS_chr1-1_0009 PE=4 SV=1
Aminophospholipid translocase (Flippase) that localizes primarily to the plasma membrane OS=Komagataella pastoris (strain GS115 / ATCC 20864) GN=PAS_chr2-1_0756 PE=4 SV=1
Nucleolar protein required for 60S ribosomal subunit biogenesis OS=Komagataella pastoris (strain GS115 / ATCC 20864) GN=PAS_chr3_1036 PE=4 SV=1
Uncharacterized protein OS=Komagataella pastoris (strain GS115 / ATCC 20864) GN=PAS_chr4_0411 PE=4 SV=1
Serine-threonine protein kinase that is part of a glucose-sensing system OS=Komagataella pastoris (strain GS115 / ATCC 20864) GN=PAS_chr2-2_0103 PE=4 SV=1
Putative uncharacterized protein OS=Komagataella pastoris (strain GS115 / ATCC 20864) GN=PAS_chr2-1_0463 PE=4 SV=1
Serine/threonine protein kinase OS=Komagataella pastoris (strain GS115 / ATCC 20864) GN=PAS_chr3_0195 PE=4 SV=1
Putative uncharacterized protein OS=Komagataella pastoris (strain GS115 / ATCC 20864) GN=PAS_chr1-4_0232 PE=4 SV=1
Aspartokinase OS=Komagataella pastoris (strain GS115 / ATCC 20864) GN=PAS_chr4_0150 PE=3 SV=1
Uncharacterized protein OS=Komagataella pastoris (strain GS115 / ATCC 20864) GN=PAS_chr4_0162 PE=4 SV=1
Putative uncharacterized protein OS=Komagataella pastoris (strain GS115 / ATCC 20864) GN=PAS_FragB_0028 PE=4 SV=1
Low affinity vacuolar membrane localized monovalent cation/H+ antiporter OS=Komagataella pastoris (strain GS115 / ATCC 20864) GN=PAS_chr4_0647 PE=4 SV=1
Protein that induces appearance of [PIN+] prion when overproduced OS=Komagataella pastoris (strain GS115 / ATCC 20864) GN=PAS_chr4_0500 PE=4 SV=1
Vacuolar transporter OS=Komagataella pastoris (strain GS115 / ATCC 20864) GN=PAS_chr3_0295 PE=4 SV=1
Putative uncharacterized protein OS=Komagataella pastoris (strain GS115 / ATCC 20864) GN=PAS_chr2-1_0664 PE=4 SV=1
Essential helicase component of heterohexameric MCM2-7 complexes OS=Komagataella pastoris (strain GS115 / ATCC 20864) GN=PAS_chr1-4_0142 PE=3 SV=1
Pho85p cyclin of the Pho80p subfamily, forms a functional kinase complex with Pho85p OS=Komagataella pastoris (strain GS115 / ATCC 20864) GN=PAS_chr1-4_0236 PE=4 SV=1
Cytoplasmic response regulator, part of a two-component signal transducer that mediates osmosensing OS=Komagataella pastoris (strain GS115 / ATCC 20864) GN=PAS_chr3_0849 PE=4 SV=1
Transcriptional activator OS=Komagataella pastoris (strain GS115 / ATCC 20864) GN=PAS_chr1-4_0339 PE=4 SV=1
Subunit of both RNase MRP, which cleaves pre-rRNA, and nuclear RNase P, which cleaves tRNA OS=Komagataella pastoris (strain GS115 / ATCC 20864) GN=PAS_chr3_0927 PE=3 SV=1
Ribosomal protein L4 of the large (60S) ribosomal subunit, nearly identical to Rpl8Ap OS=Komagataella pastoris (strain GS115 / ATCC 20864) GN=PAS_chr1-1_0216 PE=4 SV=1
Phospho-2-dehydro-3-deoxyheptonate aldolase OS=Komagataella pastoris (strain GS115 / ATCC 20864) GN=PAS_chr1-4_0218 PE=3 SV=1
RNA helicase in the DEAH-box family involved in the second catalytic step of splicing, exhibits ATP- OS=Komagataella pastoris (strain GS115 / ATCC 20864) GN=PAS_chr1-4_0208 PE=4 SV=1
Mitochondrial aldehyde dehydrogenase OS=Komagataella pastoris (strain GS115 / ATCC 20864) GN=PAS_chr4_0043 PE=3 SV=1
Uncharacterized protein OS=Komagataella pastoris (strain GS115 / ATCC 20864) GN=PAS_chr4_0633 PE=4 SV=1
Ubiquitin carboxyl-terminal hydrolase OS=Komagataella pastoris (strain GS115 / ATCC 20864) GN=PAS_chr3_0605 PE=3 SV=1
Telobox-containing general regulatory factor OS=Komagataella pastoris (strain GS115 / ATCC 20864) GN=PAS_chr1-4_0281 PE=4 SV=1
Beta subunit of the translation initiation factor eIF2 OS=Komagataella pastoris (strain GS115 / ATCC 20864) GN=PAS_chr1-4_0135 PE=4 SV=1
Putative uncharacterized protein OS=Komagataella pastoris (strain GS115 / ATCC 20864) GN=PAS_chr1-1_0470 PE=4 SV=1
Suppressor of sphingoid long chain base (LCB) sensitivity of an LCB-lyase mutation OS=Komagataella pastoris (strain GS115 / ATCC 20864) GN=PAS_chr4_0498 PE=4 SV=1
TFIID subunit (67 kDa), involved in RNA polymerase II transcription initiation OS=Komagataella pastoris (strain GS115 / ATCC 20864) GN=PAS_FragD_0016 PE=4 SV=1
Uncharacterized protein OS=Komagataella pastoris (strain GS115 / ATCC 20864) GN=PAS_chr4_0962 PE=4 SV=1
Putative uncharacterized protein OS=Komagataella pastoris (strain GS115 / ATCC 20864) GN=PAS_chr3_0405 PE=4 SV=1
Putative uncharacterized protein OS=Komagataella pastoris (strain GS115 / ATCC 20864) GN=PAS_chr3_1187 PE=3 SV=1
2~-O-ribose methyltransferase, methylates the 2~-O-ribose of nucleotides OS=Komagataella pastoris (strain GS115 / ATCC 20864) GN=PAS_chr3_0947 PE=3 SV=1
Elongation factor 1-alpha OS=Komagataella pastoris (strain GS115 / ATCC 20864) GN=PAS_FragB_0052 PE=3 SV=1
Uncharacterized protein OS=Komagataella pastoris (strain GS115 / ATCC 20864) GN=PAS_chr4_0912 PE=3 SV=1
Ribosomal protein L30 of the large (60S) ribosomal subunit, nearly identical to Rpl24Ap and has simi OS=Komagataella pastoris (strain GS115 / ATCC 20864) GN=PAS_chr2-1_0086 PE=4 SV=1
Multifunctional enzyme of the peroxisomal fatty acid beta-oxidation pathway OS=Komagataella pastoris (strain GS115 / ATCC 20864) GN=PAS_chr2-1_0776 PE=3 SV=1
Prenyltransferase, required for cell viability OS=Komagataella pastoris (strain GS115 / ATCC 20864) GN=PAS_chr1-1_0301 PE=4 SV=1
Nucleolar protein OS=Komagataella pastoris (strain GS115 / ATCC 20864) GN=PAS_chr3_0903 PE=4 SV=1
cAMP-dependent protein kinase regulatory subunit OS=Komagataella pastoris (strain GS115 / ATCC 20864) GN=PAS_chr3_0546 PE=3 SV=1
40S ribosomal protein S21 OS=Komagataella pastoris (strain GS115 / ATCC 20864) GN=PAS_chr3_0596 PE=3 SV=1
One of six subunits of the RNA polymerase III transcription initiation factor complex (TFIIIC) OS=Komagataella pastoris (strain GS115 / ATCC 20864) GN=PAS_chr4_0377 PE=4 SV=1
Type II HSP40 co-chaperone that interacts with the HSP70 protein Ssa1p OS=Komagataella pastoris (strain GS115 / ATCC 20864) GN=PAS_chr2-2_0151 PE=4 SV=1
Protein VTS1 OS=Komagataella pastoris (strain GS115 / ATCC 20864) GN=PAS_FragB_0007 PE=4 SV=1
Protein that localizes to chromatin and has a role in regulation of histone gene expression OS=Komagataella pastoris (strain GS115 / ATCC 20864) GN=PAS_chr2-1_0401 PE=4 SV=1
Cytosolic L-asparaginase OS=Komagataella pastoris (strain GS115 / ATCC 20864) GN=PAS_chr3_0591 PE=3 SV=1
Putative uncharacterized protein OS=Komagataella pastoris (strain GS115 / ATCC 20864) GN=PAS_chr2-1_0819 PE=4 SV=1
AdoMet-dependent methyltransferase involved in rRNA processing and 60S ribosomal subunit maturation OS=Komagataella pastoris (strain GS115 / ATCC 20864) GN=PAS_chr4_0464 PE=3 SV=1
Protein kinase involved in regulating diverse events including vesicular trafficking, DNA repair, an OS=Komagataella pastoris (strain GS115 / ATCC 20864) GN=PAS_chr2-1_0219 PE=4 SV=1
NAD(+)-dependent glutamate dehydrogenase, degrades glutamate to ammonia and alpha-ketoglutarate OS=Komagataella pastoris (strain GS115 / ATCC 20864) GN=PAS_chr2-1_0311 PE=4 SV=1
Nuclear protein involved in asymmetric localization of ASH1 mRNA OS=Komagataella pastoris (strain GS115 / ATCC 20864) GN=PAS_chr1-1_0414 PE=4 SV=1
Microtubule-associated protein (MAP) of the XMAP215/Dis1 family OS=Komagataella pastoris (strain GS115 / ATCC 20864) GN=PAS_chr4_0282 PE=4 SV=1
Essential DEAH-box ATP-dependent RNA helicase specific to the U3 snoRNP OS=Komagataella pastoris (strain GS115 / ATCC 20864) GN=PAS_chr3_0344 PE=4 SV=1
Similar to globins and has a functional heme-binding domain OS=Komagataella pastoris (strain GS115 / ATCC 20864) GN=PAS_chr4_0562 PE=4 SV=1
Deubiquitinating enzyme anchored to the outer mitochondrial membrane OS=Komagataella pastoris (strain GS115 / ATCC 20864) GN=PAS_chr4_0174 PE=4 SV=1
Nuclear pore protein that is part of the evolutionarily conserved Nup84p complex OS=Komagataella pastoris (strain GS115 / ATCC 20864) GN=PAS_chr1-1_0224 PE=4 SV=1
Fatty acid elongase OS=Komagataella pastoris (strain GS115 / ATCC 20864) GN=PAS_chr3_0602 PE=4 SV=1
Putative uncharacterized protein OS=Komagataella pastoris (strain GS115 / ATCC 20864) GN=PAS_chr2-1_0276 PE=4 SV=1
Putative serine/threonine protein kinase OS=Komagataella pastoris (strain GS115 / ATCC 20864) GN=PAS_chr2-2_0038 PE=4 SV=1
One of five related septins (Cdc3p, Cdc10p, Cdc11p, Cdc12p, Shs1p) OS=Komagataella pastoris (strain GS115 / ATCC 20864) GN=PAS_chr3_0977 PE=3 SV=1
Uncharacterized protein OS=Komagataella pastoris (strain GS115 / ATCC 20864) GN=PAS_chr4_0950 PE=4 SV=1
Vacuolar ATPase V1 domain subunit A containing the catalytic nucleotide binding sites OS=Komagataella pastoris (strain GS115 / ATCC 20864) GN=PAS_chr1-1_0309 PE=3 SV=1
Protein binding phosphatidylinositol 3-phosphate, involved in telomere-proximal repression of gene e OS=Komagataella pastoris (strain GS115 / ATCC 20864) GN=PAS_chr2-1_0229 PE=4 SV=1
Putative uncharacterized protein OS=Komagataella pastoris (strain GS115 / ATCC 20864) GN=PAS_chr2-1_0201 PE=4 SV=1
Putative uncharacterized protein OS=Komagataella pastoris (strain GS115 / ATCC 20864) GN=PAS_chr3_1113 PE=4 SV=1
Putative uncharacterized protein OS=Komagataella pastoris (strain GS115 / ATCC 20864) GN=PAS_chr3_1052 PE=4 SV=1
Component of the septin ring of the mother-bud neck that is required for cytokinesis OS=Komagataella pastoris (strain GS115 / ATCC 20864) GN=PAS_chr4_0548 PE=3 SV=1
Vacuolar proteinase B (YscB), a serine protease of the subtilisin family OS=Komagataella pastoris (strain GS115 / ATCC 20864) GN=PAS_chr1-1_0226 PE=3 SV=1
Protein kinase involved in the response to oxidative and osmotic stress OS=Komagataella pastoris (strain GS115 / ATCC 20864) GN=PAS_chr2-2_0332 PE=4 SV=1
Importin subunit alpha OS=Komagataella pastoris (strain GS115 / ATCC 20864) GN=PAS_chr3_0612 PE=3 SV=1
Glyceraldehyde-3-phosphate dehydrogenase OS=Komagataella pastoris (strain GS115 / ATCC 20864) GN=PAS_chr2-1_0437 PE=3 SV=1
Protein with a role in maintenance of cellular integrity OS=Komagataella pastoris (strain GS115 / ATCC 20864) GN=PAS_chr2-2_0414 PE=4 SV=1
Subunit of the heterohexameric cochaperone prefoldin complex which binds specifically to cytosolic c OS=Komagataella pastoris (strain GS115 / ATCC 20864) GN=PAS_chr2-1_0194 PE=3 SV=1
Putative magnesium transporter OS=Komagataella pastoris (strain GS115 / ATCC 20864) GN=PAS_chr2-2_0260 PE=4 SV=1
Mitochondrial alcohol dehydrogenase isozyme III OS=Komagataella pastoris (strain GS115 / ATCC 20864) GN=PAS_chr2-1_0472 PE=3 SV=1
Putative uncharacterized protein OS=Komagataella pastoris (strain GS115 / ATCC 20864) GN=PAS_chr3_1233 PE=4 SV=1
Uncharacterized protein OS=Komagataella pastoris (strain GS115 / ATCC 20864) GN=PAS_chr4_0855 PE=4 SV=1
Component of the exomer complex, which also contains Csh6p, Bch1p, Bch2p, and Bud7p OS=Komagataella pastoris (strain GS115 / ATCC 20864) GN=PAS_chr4_0675 PE=4 SV=1
Putative uncharacterized protein OS=Komagataella pastoris (strain GS115 / ATCC 20864) GN=PAS_chr3_1208 PE=4 SV=1
Putative uncharacterized protein OS=Komagataella pastoris (strain GS115 / ATCC 20864) GN=PAS_chr2-1_0645 PE=4 SV=1
Putative FAD transporter OS=Komagataella pastoris (strain GS115 / ATCC 20864) GN=PAS_chr1-1_0176 PE=4 SV=1
Putative uncharacterized protein OS=Komagataella pastoris (strain GS115 / ATCC 20864) GN=PAS_chr1-4_0527 PE=4 SV=1
Protein binding phosphatidylinositol 3-phosphate OS=Komagataella pastoris (strain GS115 / ATCC 20864) GN=PAS_chr1-1_0235 PE=4 SV=1
Putative uncharacterized protein OS=Komagataella pastoris (strain GS115 / ATCC 20864) GN=PAS_chr3_0952 PE=4 SV=1
Largest subunit of the Anaphase-Promoting Complex/Cyclosome (APC/C) OS=Komagataella pastoris (strain GS115 / ATCC 20864) GN=PAS_chr1-4_0020 PE=4 SV=1
Translation initiation factor eIF4G, subunit of the mRNA cap-binding protein complex (EIF4F) OS=Komagataella pastoris (strain GS115 / ATCC 20864) GN=PAS_chr1-1_0053 PE=4 SV=1
Carbonic anhydrase OS=Komagataella pastoris (strain GS115 / ATCC 20864) GN=PAS_chr4_0578 PE=3 SV=1
Transcription factor OS=Komagataella pastoris (strain GS115 / ATCC 20864) GN=PAS_chr4_0887 PE=4 SV=1
Putative transporter, member of the sugar porter family OS=Komagataella pastoris (strain GS115 / ATCC 20864) GN=PAS_chr2-1_0728 PE=3 SV=1
Putative uncharacterized protein OS=Komagataella pastoris (strain GS115 / ATCC 20864) GN=PAS_chr2-2_0495 PE=4 SV=1
Conserved cysteine protease required for autophagy OS=Komagataella pastoris (strain GS115 / ATCC 20864) GN=PAS_chr1-4_0522 PE=4 SV=1
Uncharacterized protein OS=Komagataella pastoris (strain GS115 / ATCC 20864) GN=PAS_chr4_0969 PE=4 SV=1
ATPase involved in protein folding and the response to stress OS=Komagataella pastoris (strain GS115 / ATCC 20864) GN=PAS_chr3_0230 PE=3 SV=1
Membrane protein OS=Komagataella pastoris (strain GS115 / ATCC 20864) GN=PAS_chr3_0930 PE=4 SV=1
Putative uncharacterized protein OS=Komagataella pastoris (strain GS115 / ATCC 20864) GN=PAS_chr3_1206 PE=4 SV=1
Primary component of eisosomes OS=Komagataella pastoris (strain GS115 / ATCC 20864) GN=PAS_chr1-4_0569 PE=4 SV=1
Carbon source-responsive zinc-finger transcription factor OS=Komagataella pastoris (strain GS115 / ATCC 20864) GN=PAS_chr4_0487 PE=4 SV=1
Subunit of TORC1, a rapamycin-sensitive complex involved in growth control OS=Komagataella pastoris (strain GS115 / ATCC 20864) GN=PAS_chr2-1_0459 PE=4 SV=1
Protein involved in the organization of the actin cytoskeleton OS=Komagataella pastoris (strain GS115 / ATCC 20864) GN=PAS_chr3_0795 PE=4 SV=1
Putative uncharacterized protein OS=Komagataella pastoris (strain GS115 / ATCC 20864) GN=PAS_chr2-1_0516 PE=4 SV=1
Coronin OS=Komagataella pastoris (strain GS115 / ATCC 20864) GN=PAS_chr2-1_0591 PE=3 SV=1
Actin-binding protein of the cortical actin cytoskeleton OS=Komagataella pastoris (strain GS115 / ATCC 20864) GN=PAS_chr2-2_0320 PE=4 SV=1
RNA polymerase III subunit C37 OS=Komagataella pastoris (strain GS115 / ATCC 20864) GN=PAS_chr4_0031 PE=4 SV=1
Mitochondrial aldehyde dehydrogenase OS=Komagataella pastoris (strain GS115 / ATCC 20864) GN=PAS_chr2-1_0506 PE=4 SV=1
Putative vacuolar Fe2+/Mn2+ transporter OS=Komagataella pastoris (strain GS115 / ATCC 20864) GN=PAS_chr3_0372 PE=4 SV=1
Protein involved in regulated synthesis of PtdIns(3,5)P(2) OS=Komagataella pastoris (strain GS115 / ATCC 20864) GN=PAS_chr1-4_0508 PE=4 SV=1
Poly(A) binding protein, part of the 3~-end RNA-processing complex, mediates interactions between th OS=Komagataella pastoris (strain GS115 / ATCC 20864) GN=PAS_chr2-1_0097 PE=4 SV=1
Homeobox transcription factor OS=Komagataella pastoris (strain GS115 / ATCC 20864) GN=PAS_chr2-2_0043 PE=3 SV=1
Component of the Paf1p complex OS=Komagataella pastoris (strain GS115 / ATCC 20864) GN=PAS_chr3_1035 PE=4 SV=1
Cleavage and polyadenylation factor I (CF I) component OS=Komagataella pastoris (strain GS115 / ATCC 20864) GN=PAS_chr2-2_0134 PE=4 SV=1
Conserved nuclear RNA-binding protein OS=Komagataella pastoris (strain GS115 / ATCC 20864) GN=PAS_chr1-4_0335 PE=4 SV=1
Glucose-repressible protein kinase involved in signal transduction during cell proliferation in resp OS=Komagataella pastoris (strain GS115 / ATCC 20864) GN=PAS_chr3_0148 PE=4 SV=1
Putative uncharacterized protein OS=Komagataella pastoris (strain GS115 / ATCC 20864) GN=PAS_chr1-1_0399 PE=4 SV=1
Protein serine/threonine kinase required for vesicle formation in autophagy OS=Komagataella pastoris (strain GS115 / ATCC 20864) GN=PAS_chr2-1_0641 PE=4 SV=1
Uncharacterized protein OS=Komagataella pastoris (strain GS115 / ATCC 20864) GN=PAS_chr4_0161 PE=4 SV=1
ATP synthase subunit alpha OS=Komagataella pastoris (strain GS115 / ATCC 20864) GN=PAS_chr3_0576 PE=3 SV=1
Mitochondrial and cytoplasmic valyl-tRNA synthetase OS=Komagataella pastoris (strain GS115 / ATCC 20864) GN=PAS_chr3_0754 PE=3 SV=1
Constituent of 66S pre-ribosomal particles, required for large (60S) ribosomal subunit biogenesis OS=Komagataella pastoris (strain GS115 / ATCC 20864) GN=PAS_chr3_0094 PE=4 SV=1
Hsp90 cochaperone, interacts with the Ssa group of the cytosolic Hsp70 chaperones OS=Komagataella pastoris (strain GS115 / ATCC 20864) GN=PAS_chr2-1_0518 PE=4 SV=1
Aminophospholipid translocase (Flippase) that localizes primarily to the plasma membrane OS=Komagataella pastoris (strain GS115 / ATCC 20864) GN=PAS_chr2-1_0057 PE=4 SV=1
Topoisomerase II-associated deadenylation-dependent mRNA-decapping factor OS=Komagataella pastoris (strain GS115 / ATCC 20864) GN=PAS_chr2-2_0378 PE=4 SV=1
Acetyltransferase required for the establishment of sister chromatid cohesion OS=Komagataella pastoris (strain GS115 / ATCC 20864) GN=PAS_chr3_0914 PE=4 SV=1
Glycerol 3-phosphate/dihydroxyacetone phosphate dual substrate-specific sn-1 acyltransferase of the OS=Komagataella pastoris (strain GS115 / ATCC 20864) GN=PAS_chr3_0073 PE=4 SV=1
One of six ATPases of the 19S regulatory particle of the 26S proteasome OS=Komagataella pastoris (strain GS115 / ATCC 20864) GN=PAS_chr4_0736 PE=4 SV=1
Protein kinase with similarityto serine/threonine protein kinase Ypk1p OS=Komagataella pastoris (strain GS115 / ATCC 20864) GN=PAS_chr3_0127 PE=4 SV=1
Protein involved in bud-site selection and required for axial budding pattern OS=Komagataella pastoris (strain GS115 / ATCC 20864) GN=PAS_chr3_0331 PE=4 SV=1
Transcriptional activator OS=Komagataella pastoris (strain GS115 / ATCC 20864) GN=PAS_chr1-4_0336 PE=4 SV=1
Putative uncharacterized protein OS=Komagataella pastoris (strain GS115 / ATCC 20864) GN=PAS_chr3_0067 PE=4 SV=1
Nucleotide exchange factor for Gsp1p, localizes to the nucleus OS=Komagataella pastoris (strain GS115 / ATCC 20864) GN=PAS_chr4_0702 PE=4 SV=1
Essential subunit of the histone deacetylase Rpd3S complex OS=Komagataella pastoris (strain GS115 / ATCC 20864) GN=PAS_chr3_0174 PE=4 SV=1
Subunit of the RNA polymerase II mediator complex OS=Komagataella pastoris (strain GS115 / ATCC 20864) GN=PAS_chr3_0152 PE=4 SV=1
Catalytic subunit of the SWI/SNF chromatin remodeling complex involved in transcriptional regulation OS=Komagataella pastoris (strain GS115 / ATCC 20864) GN=PAS_FragD_0018 PE=4 SV=1
Putative uncharacterized protein OS=Komagataella pastoris (strain GS115 / ATCC 20864) GN=PAS_chr3_1240 PE=4 SV=1
Putative uncharacterized protein OS=Komagataella pastoris (strain GS115 / ATCC 20864) GN=PAS_chr2-2_0321 PE=4 SV=1
Uncharacterized protein OS=Komagataella pastoris (strain GS115 / ATCC 20864) GN=PAS_chr4_0947 PE=4 SV=1
Putative uncharacterized protein OS=Komagataella pastoris (strain GS115 / ATCC 20864) GN=PAS_chr3_0717 PE=4 SV=1
5-phospho-ribosyl-1(Alpha)-pyrophosphate synthetase, synthesizes PRPP OS=Komagataella pastoris (strain GS115 / ATCC 20864) GN=PAS_chr2-2_0174 PE=4 SV=1
Putative uncharacterized protein OS=Komagataella pastoris (strain GS115 / ATCC 20864) GN=PAS_chr3_0494 PE=4 SV=1
ATP synthase subunit beta OS=Komagataella pastoris (strain GS115 / ATCC 20864) GN=PAS_chr2-2_0165 PE=3 SV=1
Forkhead family transcription factor with a major role in the expression of G2/M phase genes OS=Komagataella pastoris (strain GS115 / ATCC 20864) GN=PAS_chr4_0205 PE=4 SV=1
Protein component of the large (60S) ribosomal subunit OS=Komagataella pastoris (strain GS115 / ATCC 20864) GN=PAS_chr2-2_0229 PE=4 SV=1
Putative uncharacterized protein OS=Komagataella pastoris (strain GS115 / ATCC 20864) GN=PAS_chr3_1154 PE=4 SV=1
Putative uncharacterized protein OS=Komagataella pastoris (strain GS115 / ATCC 20864) GN=PAS_chr3_0510 PE=4 SV=1
Putative uncharacterized protein OS=Komagataella pastoris (strain GS115 / ATCC 20864) GN=PAS_chr3_0705 PE=4 SV=1
3-phosphoglycerate dehydrogenase, catalyzes the first step in serine and glycine biosynthesis OS=Komagataella pastoris (strain GS115 / ATCC 20864) GN=PAS_chr2-1_0657 PE=3 SV=1
Putative uncharacterized protein OS=Komagataella pastoris (strain GS115 / ATCC 20864) GN=PAS_chr3_1203 PE=4 SV=1
Uncharacterized protein OS=Komagataella pastoris (strain GS115 / ATCC 20864) GN=PAS_chr4_0974 PE=4 SV=1
Cytoplasmic pre-60S factor OS=Komagataella pastoris (strain GS115 / ATCC 20864) GN=PAS_chr1-1_0031 PE=4 SV=1
Putative uncharacterized protein OS=Komagataella pastoris (strain GS115 / ATCC 20864) GN=PAS_chr3_0505 PE=4 SV=1
Non-essential tetra-spanning membrane protein found mostly in the late Golgi OS=Komagataella pastoris (strain GS115 / ATCC 20864) GN=PAS_chr1-1_0372 PE=4 SV=1
Key endocytic protein involved in a network of interactions with other endocytic proteins OS=Komagataella pastoris (strain GS115 / ATCC 20864) GN=PAS_chr2-1_0651 PE=4 SV=1
Putative uncharacterized protein OS=Komagataella pastoris (strain GS115 / ATCC 20864) GN=PAS_chr2-1_0828 PE=4 SV=1
Serine/threonine protein kinase, subunit of the transcription factor TFIIH OS=Komagataella pastoris (strain GS115 / ATCC 20864) GN=PAS_chr2-2_0041 PE=4 SV=1
Essential nucleoporin OS=Komagataella pastoris (strain GS115 / ATCC 20864) GN=PAS_chr2-2_0385 PE=4 SV=1
Alpha 5 subunit of the 20S proteasome involved in ubiquitin-dependent catabolism OS=Komagataella pastoris (strain GS115 / ATCC 20864) GN=PAS_chr3_1129 PE=4 SV=1
Putative uncharacterized protein OS=Komagataella pastoris (strain GS115 / ATCC 20864) GN=PAS_chr3_1086 PE=4 SV=1
Myristoylated serine/threonine protein kinase involved in vacuolar protein sorting OS=Komagataella pastoris (strain GS115 / ATCC 20864) GN=PAS_chr3_0042 PE=4 SV=1
Protein component of the small (40S) ribosomal subunit OS=Komagataella pastoris (strain GS115 / ATCC 20864) GN=PAS_chr1-1_0283 PE=3 SV=1
Histone acetyltransferase catalytic subunit of the native multisubunit complex (NuA4) OS=Komagataella pastoris (strain GS115 / ATCC 20864) GN=PAS_chr4_0084 PE=4 SV=1
Glycerol-3-phosphate/dihydroxyacetone phosphate dual substrate-specific sn-1 acyltransferase OS=Komagataella pastoris (strain GS115 / ATCC 20864) GN=PAS_chr1-3_0081 PE=4 SV=1
Actin OS=Komagataella pastoris (strain GS115 / ATCC 20864) GN=ACT1 PE=3 SV=1
Transcription factor involved in glucose repression OS=Komagataella pastoris (strain GS115 / ATCC 20864) GN=PAS_chr4_0334 PE=4 SV=1
Translational elongation factor 3, stimulates the binding of aminoacyl-tRNA (AA-tRNA) to ribosomes OS=Komagataella pastoris (strain GS115 / ATCC 20864) GN=PAS_chr4_0038 PE=3 SV=1
Poly(A+) RNA-binding protein, involved in the export of mRNAs from the nucleus to the cytoplasm OS=Komagataella pastoris (strain GS115 / ATCC 20864) GN=PAS_chr1-1_0453 PE=4 SV=1
Putative nucleolar DEAD box RNA helicase OS=Komagataella pastoris (strain GS115 / ATCC 20864) GN=PAS_chr4_0231 PE=4 SV=1
Epsin-like protein involved in endocytosis and actin patch assembly OS=Komagataella pastoris (strain GS115 / ATCC 20864) GN=PAS_chr1-4_0244 PE=4 SV=1
Uncharacterized protein OS=Komagataella pastoris (strain GS115 / ATCC 20864) GN=PAS_chr4_0782 PE=4 SV=1
Putative uncharacterized protein OS=Komagataella pastoris (strain GS115 / ATCC 20864) GN=PAS_c131_0007 PE=4 SV=1
Putative uncharacterized protein OS=Komagataella pastoris (strain GS115 / ATCC 20864) GN=PAS_c034_0033 PE=4 SV=1
Protein component of the small (40S) ribosomal subunit OS=Komagataella pastoris (strain GS115 / ATCC 20864) GN=PAS_chr2-1_0584 PE=3 SV=1
Transcriptional activator of proline utilization genes OS=Komagataella pastoris (strain GS115 / ATCC 20864) GN=PAS_chr2-1_0329 PE=4 SV=1

## Sheet: W-G
prot_description	Sample:W-G
Uncharacterized protein OS=Komagataella pastoris (strain GS115 / ATCC 20864) GN=PAS_chr4_0230 PE=4 SV=1
GDP-mannose pyrophosphorylase (Mannose-1-phosphate guanyltransferase) OS=Komagataella pastoris (strain GS115 / ATCC 20864) GN=PAS_chr3_0870 PE=4 SV=1
Transmembrane protein involved in formation of Cvt and autophagic vesicles OS=Komagataella pastoris (strain GS115 / ATCC 20864) GN=PAS_chr4_0510 PE=4 SV=1
Putative uncharacterized protein OS=Komagataella pastoris (strain GS115 / ATCC 20864) GN=PAS_chr1-1_0156 PE=4 SV=1
Glycerophosphocholine (GroPCho) phosphodiesterase OS=Komagataella pastoris (strain GS115 / ATCC 20864) GN=PAS_chr2-2_0314 PE=4 SV=1
Guanine nucleotide exchange factor (GEF or GDP-release factor) for Cdc42p OS=Komagataella pastoris (strain GS115 / ATCC 20864) GN=PAS_chr1-4_0533 PE=4 SV=1
Transporter of the ATP-binding cassette (ABC) family involved in bile acid transport OS=Komagataella pastoris (strain GS115 / ATCC 20864) GN=PAS_chr1-1_0220 PE=3 SV=1
Ubiquitin-specific protease that removes ubiquitin from ubiquitinated proteins, cleaves at the C ter OS=Komagataella pastoris (strain GS115 / ATCC 20864) GN=PAS_chr3_0117 PE=4 SV=1
Regulatory subunit of trehalose-6-phosphate synthase/phosphatase complex OS=Komagataella pastoris (strain GS115 / ATCC 20864) GN=PAS_chr2-1_0739 PE=4 SV=1
Uncharacterized protein OS=Komagataella pastoris (strain GS115 / ATCC 20864) GN=PAS_chr4_0752 PE=4 SV=1
Putative uncharacterized protein OS=Komagataella pastoris (strain GS115 / ATCC 20864) GN=PAS_chr1-4_0616 PE=4 SV=1
60S ribosomal protein L36 OS=Komagataella pastoris (strain GS115 / ATCC 20864) GN=PAS_FragB_0036 PE=3 SV=1
Eukaryotic translation initiation factor 3 subunit C OS=Komagataella pastoris (strain GS115 / ATCC 20864) GN=NIP1 PE=3 SV=1
Putative uncharacterized protein OS=Komagataella pastoris (strain GS115 / ATCC 20864) GN=PAS_chr2-2_0472 PE=4 SV=1
Enolase I, a phosphopyruvate hydratase that catalyzes the conversion of 2-phosphoglycerate to phosph OS=Komagataella pastoris (strain GS115 / ATCC 20864) GN=PAS_chr3_0082 PE=3 SV=1
Structural maintenance of chromosomes protein OS=Komagataella pastoris (strain GS115 / ATCC 20864) GN=PAS_chr2-1_0082 PE=3 SV=1
Aromatic aminotransferase I, expression is regulated by general control of amino acid biosynthesis OS=Komagataella pastoris (strain GS115 / ATCC 20864) GN=PAS_chr1-4_0608 PE=4 SV=1
Adenylate cyclase, required for cAMP production and cAMP-dependent protein kinase signaling OS=Komagataella pastoris (strain GS115 / ATCC 20864) GN=PAS_chr4_0356 PE=4 SV=1
Structural maintenance of chromosomes protein OS=Komagataella pastoris (strain GS115 / ATCC 20864) GN=PAS_chr2-2_0416 PE=3 SV=1
Mitochondrial porin (Voltage-dependent anion channel), outer membrane protein OS=Komagataella pastoris (strain GS115 / ATCC 20864) GN=PAS_chr2-2_0392 PE=4 SV=1
Protein of the mitochondrial outer surface OS=Komagataella pastoris (strain GS115 / ATCC 20864) GN=PAS_chr2-1_0535 PE=4 SV=1
F-box receptor protein, subunit of the Skp1-Cdc53-F-box receptor (SCF) E3 ubiquitin ligase complex OS=Komagataella pastoris (strain GS115 / ATCC 20864) GN=PAS_chr2-1_0200 PE=4 SV=1
Putative uncharacterized protein OS=Komagataella pastoris (strain GS115 / ATCC 20864) GN=PAS_chr1-4_0603 PE=4 SV=1
Protein containing a CUE domain that binds ubiquitin OS=Komagataella pastoris (strain GS115 / ATCC 20864) GN=PAS_chr2-2_0292 PE=4 SV=1
Putative uncharacterized protein OS=Komagataella pastoris (strain GS115 / ATCC 20864) GN=PAS_chr2-1_0130 PE=4 SV=1
Major transcriptional repressor of DNA-damage-regulated genes OS=Komagataella pastoris (strain GS115 / ATCC 20864) GN=PAS_chr2-2_0153 PE=4 SV=1
Putative uncharacterized protein OS=Komagataella pastoris (strain GS115 / ATCC 20864) GN=PAS_chr3_0574 PE=4 SV=1
Sorting nexin OS=Komagataella pastoris (strain GS115 / ATCC 20864) GN=PAS_chr2-1_0389 PE=4 SV=1
Adenylate kinase OS=Komagataella pastoris (strain GS115 / ATCC 20864) GN=PAS_chr3_0257 PE=3 SV=1
Inositol 1-phosphate synthase OS=Komagataella pastoris (strain GS115 / ATCC 20864) GN=PAS_chr2-2_0113 PE=4 SV=1
Putative uncharacterized protein OS=Komagataella pastoris (strain GS115 / ATCC 20864) GN=PAS_chr3_1247 PE=4 SV=1
Co-chaperone that binds to Hsp82p and activates its ATPase activity OS=Komagataella pastoris (strain GS115 / ATCC 20864) GN=PAS_chr3_0170 PE=4 SV=1
Putative GDP/GTP exchange factor required for mitotic exit at low temperatures OS=Komagataella pastoris (strain GS115 / ATCC 20864) GN=PAS_chr3_0758 PE=4 SV=1
Palmitoyltransferase OS=Komagataella pastoris (strain GS115 / ATCC 20864) GN=PAS_chr3_0246 PE=3 SV=1
Protein required for ubiquinone (Coenzyme Q) biosynthesis and for respiratory growth OS=Komagataella pastoris (strain GS115 / ATCC 20864) GN=PAS_chr1-4_0591 PE=4 SV=1
ATPase that forms a large complex, containing actin and several actin-related proteins OS=Komagataella pastoris (strain GS115 / ATCC 20864) GN=PAS_chr1-1_0087 PE=4 SV=1
GTPase activating protein (GAP) for Rho1p, involved in signaling to the actin cytoskeleton, null mut OS=Komagataella pastoris (strain GS115 / ATCC 20864) GN=PAS_chr2-1_0117 PE=4 SV=1
BAR domain-containing protein that localizes to both early and late Golgi vesicles OS=Komagataella pastoris (strain GS115 / ATCC 20864) GN=PAS_chr4_0182 PE=4 SV=1
Glutamine-dependent NAD(+) synthetase OS=Komagataella pastoris (strain GS115 / ATCC 20864) GN=PAS_chr4_0233 PE=4 SV=1
Putative uncharacterized protein OS=Komagataella pastoris (strain GS115 / ATCC 20864) GN=PAS_chr1-1_0478 PE=4 SV=1
Putative uncharacterized protein OS=Komagataella pastoris (strain GS115 / ATCC 20864) GN=PAS_chr3_1210 PE=4 SV=1
Putative uncharacterized protein OS=Komagataella pastoris (strain GS115 / ATCC 20864) GN=PAS_chr2-1_0870 PE=4 SV=1
Kinesin-related motor protein involved in mitotic spindle positioning OS=Komagataella pastoris (strain GS115 / ATCC 20864) GN=PAS_chr4_0091 PE=3 SV=1
One of two S. cerevisiae homologs (Sds23p and Sds24p) of the Schizosaccharomyces pombe Sds23 protein OS=Komagataella pastoris (strain GS115 / ATCC 20864) GN=PAS_chr1-4_0219 PE=4 SV=1
Putative uncharacterized protein OS=Komagataella pastoris (strain GS115 / ATCC 20864) GN=PAS_chr2-1_0876 PE=4 SV=1
Ubiquitin-like protein of the SUMO family OS=Komagataella pastoris (strain GS115 / ATCC 20864) GN=PAS_chr1-4_0205 PE=4 SV=1
Vacuolar membrane zinc transporter OS=Komagataella pastoris (strain GS115 / ATCC 20864) GN=PAS_chr3_0966 PE=4 SV=1
Uncharacterized protein OS=Komagataella pastoris (strain GS115 / ATCC 20864) GN=PAS_chr4_0797 PE=4 SV=1
Subunit of the SAGA transcriptional regulatory complex but not present in SAGA-like complex SLIK/SAL OS=Komagataella pastoris (strain GS115 / ATCC 20864) GN=PAS_chr1-4_0365 PE=4 SV=1
Acetate transporter required for normal sporulation OS=Komagataella pastoris (strain GS115 / ATCC 20864) GN=PAS_chr2-1_0649 PE=4 SV=1
Uncharacterized protein OS=Komagataella pastoris (strain GS115 / ATCC 20864) GN=PAS_chr4_0959 PE=4 SV=1
Putative uncharacterized protein OS=Komagataella pastoris (strain GS115 / ATCC 20864) GN=PAS_chr1-4_0660 PE=4 SV=1
Putative uncharacterized protein OS=Komagataella pastoris (strain GS115 / ATCC 20864) GN=PAS_chr3_0348 PE=4 SV=1
Protein involved in G2/M phase progression and response to DNA damage, interacts with Rad53p OS=Komagataella pastoris (strain GS115 / ATCC 20864) GN=PAS_chr2-2_0211 PE=4 SV=1
Putative uncharacterized protein OS=Komagataella pastoris (strain GS115 / ATCC 20864) GN=PAS_chr3_0272 PE=4 SV=1
Probable zinc metalloprotease PAS_chr3_0953 OS=Komagataella pastoris (strain GS115 / ATCC 20864) GN=PAS_chr3_0953 PE=3 SV=1
Plasma membrane Mg(2+) transporter, expression and turnover are regulated by Mg(2+) concentration OS=Komagataella pastoris (strain GS115 / ATCC 20864) GN=PAS_chr1-4_0096 PE=4 SV=1
Putative uncharacterized protein OS=Komagataella pastoris (strain GS115 / ATCC 20864) GN=PAS_chr2-2_0214 PE=4 SV=1
Dual-specificity protein phosphatase OS=Komagataella pastoris (strain GS115 / ATCC 20864) GN=PAS_chr3_0618 PE=4 SV=1
Serine-threonine protein kinase that is part of a glucose-sensing system OS=Komagataella pastoris (strain GS115 / ATCC 20864) GN=PAS_chr3_0873 PE=4 SV=1
UBX (Ubiquitin regulatory X) domain-containing protein that regulates Glc7p phosphatase activity and OS=Komagataella pastoris (strain GS115 / ATCC 20864) GN=PAS_chr2-1_0159 PE=4 SV=1
Subunit of the NuA3 histone acetyltransferase complex that acetylates histone H3 OS=Komagataella pastoris (strain GS115 / ATCC 20864) GN=PAS_FragD_0029 PE=4 SV=1
Elongation factor 2 (EF-2), also encoded by EFT1 OS=Komagataella pastoris (strain GS115 / ATCC 20864) GN=PAS_chr2-1_0124 PE=4 SV=1
Putative uncharacterized protein OS=Komagataella pastoris (strain GS115 / ATCC 20864) GN=PAS_chr3_1151 PE=4 SV=1
Putative uncharacterized protein OS=Komagataella pastoris (strain GS115 / ATCC 20864) GN=PAS_chr2-1_0602 PE=4 SV=1
S-adenosyl-L-methionine-dependent tRNA: m5C-methyltransferase OS=Komagataella pastoris (strain GS115 / ATCC 20864) GN=PAS_chr4_0445 PE=4 SV=1
Subunit of the Set3C deacetylase complex that interacts directly with the Set3C subunit OS=Komagataella pastoris (strain GS115 / ATCC 20864) GN=PAS_chr3_0600 PE=4 SV=1
Protein that forms a complex with the Sit4p protein phosphatase OS=Komagataella pastoris (strain GS115 / ATCC 20864) GN=PAS_chr1-3_0135 PE=4 SV=1
Putative uncharacterized protein OS=Komagataella pastoris (strain GS115 / ATCC 20864) GN=PAS_chr1-1_0033 PE=4 SV=1
ATP binding cassette family member OS=Komagataella pastoris (strain GS115 / ATCC 20864) GN=PAS_chr3_0728 PE=3 SV=1
Fe-S cluster assembly protein DRE2 OS=Komagataella pastoris (strain GS115 / ATCC 20864) GN=DRE2 PE=3 SV=1
One of two (See also PSK1) PAS domain containing S/T protein kinases OS=Komagataella pastoris (strain GS115 / ATCC 20864) GN=PAS_chr4_0076 PE=4 SV=1
Putative uncharacterized protein OS=Komagataella pastoris (strain GS115 / ATCC 20864) GN=PAS_chr3_0138 PE=4 SV=1
Putative ATP-dependent permease of the ABC transporter family of proteins OS=Komagataella pastoris (strain GS115 / ATCC 20864) GN=PAS_chr3_0935 PE=4 SV=1
Putative uncharacterized protein OS=Komagataella pastoris (strain GS115 / ATCC 20864) GN=PAS_chr2-1_0526 PE=4 SV=1
Plasma membrane arginine permease, requires phosphatidyl ethanolamine (PE) for localization OS=Komagataella pastoris (strain GS115 / ATCC 20864) GN=PAS_chr1-4_0601 PE=4 SV=1
Putative uncharacterized protein OS=Komagataella pastoris (strain GS115 / ATCC 20864) GN=PAS_chr3_0297 PE=4 SV=1
Uncharacterized protein OS=Komagataella pastoris (strain GS115 / ATCC 20864) GN=PAS_chr4_0922 PE=4 SV=1
Heat shock protein Hsp90 OS=Komagataella pastoris (strain GS115 / ATCC 20864) GN=PAS_chr1-4_0130 PE=3 SV=1
Putative uncharacterized protein OS=Komagataella pastoris (strain GS115 / ATCC 20864) GN=PAS_chr1-1_0387 PE=4 SV=1
Putative uncharacterized protein OS=Komagataella pastoris (strain GS115 / ATCC 20864) GN=PAS_chr2-2_0261 PE=4 SV=1
Dipeptidyl aminopeptidase, Golgi integral membrane protein OS=Komagataella pastoris (strain GS115 / ATCC 20864) GN=PAS_chr2-2_0310 PE=4 SV=1
Subunit of the HIR complex, a nucleosome assembly complex OS=Komagataella pastoris (strain GS115 / ATCC 20864) GN=PAS_chr2-1_0799 PE=4 SV=1
Subunit of a possibly tetrameric trichostatin A-sensitive class II histone deacetylase complex OS=Komagataella pastoris (strain GS115 / ATCC 20864) GN=PAS_chr2-2_0426 PE=4 SV=1
Mitochondrial elongation factor involved in translational elongation OS=Komagataella pastoris (strain GS115 / ATCC 20864) GN=PAS_chr4_0033 PE=4 SV=1
Putative uncharacterized protein OS=Komagataella pastoris (strain GS115 / ATCC 20864) GN=PAS_chr3_1209 PE=4 SV=1
RNA polymerase II-associated protein OS=Komagataella pastoris (strain GS115 / ATCC 20864) GN=PAS_chr4_0885 PE=4 SV=1
Subunit of the origin recognition complex, which directs DNA replication OS=Komagataella pastoris (strain GS115 / ATCC 20864) GN=PAS_chr3_0941 PE=4 SV=1
Putative uncharacterized protein OS=Komagataella pastoris (strain GS115 / ATCC 20864) GN=PAS_chr3_0191 PE=4 SV=1
Vacuolar protein sorting-associated protein 35 OS=Komagataella pastoris (strain GS115 / ATCC 20864) GN=PAS_chr1-4_0503 PE=3 SV=1
Protein involved in the regulation of cell wall synthesis OS=Komagataella pastoris (strain GS115 / ATCC 20864) GN=PAS_chr3_0768 PE=4 SV=1
Protein component of the large (60S) ribosomal subunit, nearly identical to Rpl12Ap OS=Komagataella pastoris (strain GS115 / ATCC 20864) GN=PAS_chr1-1_0189 PE=3 SV=1
Putative uncharacterized protein OS=Komagataella pastoris (strain GS115 / ATCC 20864) GN=PAS_chr2-2_0459 PE=4 SV=1
Uncharacterized protein OS=Komagataella pastoris (strain GS115 / ATCC 20864) GN=PAS_chr4_0407 PE=4 SV=1
Protein that forms a complex with Spt4p OS=Komagataella pastoris (strain GS115 / ATCC 20864) GN=PAS_chr3_1136 PE=4 SV=1
Putative uncharacterized protein OS=Komagataella pastoris (strain GS115 / ATCC 20864) GN=PAS_chr1-3_0260 PE=4 SV=1
Putative uncharacterized protein OS=Komagataella pastoris (strain GS115 / ATCC 20864) GN=PAS_chr3_1030 PE=4 SV=1
MAP kinase OS=Komagataella pastoris (strain GS115 / ATCC 20864) GN=PAS_chr1-4_0008 PE=4 SV=1
Putative uncharacterized protein OS=Komagataella pastoris (strain GS115 / ATCC 20864) GN=PAS_chr3_0919 PE=4 SV=1
Cyclin (Bur2p)-dependent protein kinase that functions in transcriptional regulation OS=Komagataella pastoris (strain GS115 / ATCC 20864) GN=PAS_chr3_0375 PE=4 SV=1
Highly conserved nuclear protein required for actin cytoskeleton organization OS=Komagataella pastoris (strain GS115 / ATCC 20864) GN=PAS_chr1-4_0311 PE=4 SV=1
Putative uncharacterized protein OS=Komagataella pastoris (strain GS115 / ATCC 20864) GN=PAS_chr2-2_0345 PE=4 SV=1
Uncharacterized protein OS=Komagataella pastoris (strain GS115 / ATCC 20864) GN=PAS_chr4_0711 PE=4 SV=1
Regulatory protein MIG1 OS=Komagataella pastoris (strain GS115 / ATCC 20864) GN=PAS_chr1-4_0526 PE=4 SV=1
Putative uncharacterized protein OS=Komagataella pastoris (strain GS115 / ATCC 20864) GN=PAS_chr1-1_0496 PE=4 SV=1
Putative uncharacterized protein OS=Komagataella pastoris (strain GS115 / ATCC 20864) GN=PAS_chr2-1_0071 PE=4 SV=1
Putative uncharacterized protein OS=Komagataella pastoris (strain GS115 / ATCC 20864) GN=PAS_chr2-1_0886 PE=4 SV=1
Protein that interacts with silencing proteins at the telomere OS=Komagataella pastoris (strain GS115 / ATCC 20864) GN=PAS_chr4_0833 PE=4 SV=1
ATP-dependent helicase OS=Komagataella pastoris (strain GS115 / ATCC 20864) GN=PAS_FragB_0056 PE=4 SV=1
tRNA:pseudouridine synthase, introduces pseudouridines at positions 26-28, 34-36, 65, and 67 of tRNA OS=Komagataella pastoris (strain GS115 / ATCC 20864) GN=PAS_chr1-4_0212 PE=4 SV=1
Palmitoylated, plasma membrane-bound casein kinase I isoform OS=Komagataella pastoris (strain GS115 / ATCC 20864) GN=PAS_chr2-1_0357 PE=4 SV=1
Gamma subunit of the translation initiation factor eIF2 OS=Komagataella pastoris (strain GS115 / ATCC 20864) GN=PAS_chr3_0839 PE=4 SV=1
Tryptophan synthase involved in tryptophan biosynthesis OS=Komagataella pastoris (strain GS115 / ATCC 20864) GN=PAS_chr2-1_0679 PE=3 SV=1
High osmolarity signaling protein SHO1 OS=Komagataella pastoris (strain GS115 / ATCC 20864) GN=SHO1 PE=3 SV=1
Beta subunit of fatty acid synthetase; catalyzes the synthesis of long-chain saturated fatty acids OS=Komagataella pastoris (strain GS115 / ATCC 20864) GN=PAS_chr1-1_0008 PE=4 SV=1
Putative transporter, member of the sugar porter family OS=Komagataella pastoris (strain GS115 / ATCC 20864) GN=PAS_chr1-3_0011 PE=3 SV=1
Calmodulin-dependent protein kinase OS=Komagataella pastoris (strain GS115 / ATCC 20864) GN=PAS_chr1-4_0302 PE=4 SV=1
Putative uncharacterized protein OS=Komagataella pastoris (strain GS115 / ATCC 20864) GN=PAS_FragB_0045 PE=4 SV=1
Putative uncharacterized protein OS=Komagataella pastoris (strain GS115 / ATCC 20864) GN=PAS_chr2-1_0507 PE=4 SV=1
Uncharacterized protein OS=Komagataella pastoris (strain GS115 / ATCC 20864) GN=PAS_chr4_0884 PE=4 SV=1
Putative uncharacterized protein OS=Komagataella pastoris (strain GS115 / ATCC 20864) GN=PAS_chr2-1_0434 PE=4 SV=1
Phosphorylase OS=Komagataella pastoris (strain GS115 / ATCC 20864) GN=PAS_chr2-1_0173 PE=3 SV=1
Small rho-like GTPase, essential for establishment and maintenance of cell polarity OS=Komagataella pastoris (strain GS115 / ATCC 20864) GN=PAS_chr1-3_0113 PE=3 SV=1
Protein required for proper cell fusion and cell morphology OS=Komagataella pastoris (strain GS115 / ATCC 20864) GN=PAS_chr3_0298 PE=4 SV=1
Proteosome activator subunit OS=Komagataella pastoris (strain GS115 / ATCC 20864) GN=PAS_chr3_0776 PE=4 SV=1
GTP-binding protein YPT10 OS=Komagataella pastoris (strain GS115 / ATCC 20864) GN=PAS_chr1-4_0626 PE=3 SV=1
Subunit of heterotrimeric Replication Protein A (RPA) OS=Komagataella pastoris (strain GS115 / ATCC 20864) GN=PAS_chr1-1_0113 PE=4 SV=1
Homeodomain-containing transcriptional repressor OS=Komagataella pastoris (strain GS115 / ATCC 20864) GN=PAS_chr2-1_0784 PE=3 SV=1
Subunit of the Hat1p-Hat2p histone acetyltransferase complex OS=Komagataella pastoris (strain GS115 / ATCC 20864) GN=PAS_chr2-1_0205 PE=4 SV=1
Rab escort protein, forms a complex with the Ras-like small GTPase Ypt1p OS=Komagataella pastoris (strain GS115 / ATCC 20864) GN=PAS_chr3_0586 PE=4 SV=1
Putative uncharacterized protein OS=Komagataella pastoris (strain GS115 / ATCC 20864) GN=PAS_chr1-1_0178 PE=4 SV=1
Putative uncharacterized protein OS=Komagataella pastoris (strain GS115 / ATCC 20864) GN=PAS_chr2-2_0479 PE=4 SV=1
Vacuolar sorting protein OS=Komagataella pastoris (strain GS115 / ATCC 20864) GN=PAS_chr1-1_0034 PE=4 SV=1
Palmitoylated, plasma membrane-bound casein kinase I isoform OS=Komagataella pastoris (strain GS115 / ATCC 20864) GN=PAS_chr4_0568 PE=4 SV=1
Essential subunit of RNA polymerase III transcription factor (TFIIIB), which is involved in transcri OS=Komagataella pastoris (strain GS115 / ATCC 20864) GN=PAS_chr2-2_0190 PE=4 SV=1
Putative uncharacterized protein OS=Komagataella pastoris (strain GS115 / ATCC 20864) GN=PAS_chr1-4_0344 PE=4 SV=1
Zinc-finger transcription factor OS=Komagataella pastoris (strain GS115 / ATCC 20864) GN=PAS_chr4_0202 PE=4 SV=1
Component of the RSC chromatin remodeling complex OS=Komagataella pastoris (strain GS115 / ATCC 20864) GN=PAS_chr2-2_0050 PE=4 SV=1
Putative uncharacterized protein OS=Komagataella pastoris (strain GS115 / ATCC 20864) GN=PAS_chr3_0260 PE=4 SV=1
Upstream serine/threonine kinase for the SNF1 complex OS=Komagataella pastoris (strain GS115 / ATCC 20864) GN=PAS_chr2-1_0639 PE=4 SV=1
Guanyl-nucleotide exchange factor for the small G-protein Sec4p OS=Komagataella pastoris (strain GS115 / ATCC 20864) GN=PAS_chr2-2_0014 PE=4 SV=1
Cytoplasmic aspartyl-tRNA synthetase, homodimeric enzyme OS=Komagataella pastoris (strain GS115 / ATCC 20864) GN=PAS_chr1-4_0095 PE=3 SV=1
Protein involved in ubiquitin ligation OS=Komagataella pastoris (strain GS115 / ATCC 20864) GN=PAS_chr3_0521 PE=4 SV=1
Pyruvate kinase OS=Komagataella pastoris (strain GS115 / ATCC 20864) GN=PAS_chr2-1_0769 PE=3 SV=1
GTPase-activating protein OS=Komagataella pastoris (strain GS115 / ATCC 20864) GN=PAS_FragB_0038 PE=4 SV=1
Uncharacterized protein OS=Komagataella pastoris (strain GS115 / ATCC 20864) GN=PAS_chr4_0531 PE=4 SV=1
Protein component of the small (40S) ribosomal subunit OS=Komagataella pastoris (strain GS115 / ATCC 20864) GN=PAS_chr3_0762 PE=3 SV=1
Ceramide synthase component, involved in synthesis of ceramide OS=Komagataella pastoris (strain GS115 / ATCC 20864) GN=PAS_chr1-1_0358 PE=4 SV=1
Putative uncharacterized protein OS=Komagataella pastoris (strain GS115 / ATCC 20864) GN=PAS_chr3_1232 PE=4 SV=1
Putative uncharacterized protein OS=Komagataella pastoris (strain GS115 / ATCC 20864) GN=PAS_chr1-4_0057 PE=4 SV=1
Putative uncharacterized protein OS=Komagataella pastoris (strain GS115 / ATCC 20864) GN=PAS_chr1-1_0129 PE=4 SV=1
Member of the imitation-switch (ISWI) class of ATP-dependent chromatin remodeling complexes OS=Komagataella pastoris (strain GS115 / ATCC 20864) GN=PAS_chr4_0128 PE=4 SV=1
High affinity sulfate permease OS=Komagataella pastoris (strain GS115 / ATCC 20864) GN=PAS_chr3_0489 PE=4 SV=1
Protein implicated in Mms22-dependent DNA repair during S phase OS=Komagataella pastoris (strain GS115 / ATCC 20864) GN=PAS_chr2-1_0643 PE=4 SV=1
Pleckstrin homology domain containing protein proposed to function as a glycerol channel activator OS=Komagataella pastoris (strain GS115 / ATCC 20864) GN=PAS_chr2-1_0479 PE=4 SV=1
Regulatory subunit of Nem1p-Spo7p phosphatase holoenzyme OS=Komagataella pastoris (strain GS115 / ATCC 20864) GN=PAS_chr1-1_0248 PE=4 SV=1
Transcriptional repressor and activator OS=Komagataella pastoris (strain GS115 / ATCC 20864) GN=PAS_chr3_0115 PE=3 SV=1
Essential RNA-binding G protein effector of mating response pathway OS=Komagataella pastoris (strain GS115 / ATCC 20864) GN=PAS_chr1-3_0045 PE=4 SV=1
Essential protein required for determination of budding pattern OS=Komagataella pastoris (strain GS115 / ATCC 20864) GN=PAS_chr1-4_0128 PE=4 SV=1
Component of the ESCRT-I complex (Stp22p, Srn2p, Vps28p, and Mvb12p), which is involved in ubiquitin OS=Komagataella pastoris (strain GS115 / ATCC 20864) GN=PAS_chr2-1_0182 PE=4 SV=1
Basic leucine zipper (BZIP) transcription factor of the ATF/CREB family, activates transcription of OS=Komagataella pastoris (strain GS115 / ATCC 20864) GN=PAS_chr3_0135 PE=4 SV=1
MAP kinase kinase kinase of the HOG1 mitogen-activated signaling pathway OS=Komagataella pastoris (strain GS115 / ATCC 20864) GN=PAS_chr1-4_0279 PE=4 SV=1
ATP-binding protein required for mismatch repair in mitosis and meiosis OS=Komagataella pastoris (strain GS115 / ATCC 20864) GN=PAS_chr4_0124 PE=4 SV=1
Sterol 3-beta-glucosyltransferase OS=Komagataella pastoris (strain GS115 / ATCC 20864) GN=ATG26 PE=3 SV=1
Putative uncharacterized protein OS=Komagataella pastoris (strain GS115 / ATCC 20864) GN=PAS_chr3_0484 PE=4 SV=1
Translation initiation factor eIF-4B, has RNA annealing activity OS=Komagataella pastoris (strain GS115 / ATCC 20864) GN=PAS_chr3_1054 PE=4 SV=1
Putative uncharacterized protein OS=Komagataella pastoris (strain GS115 / ATCC 20864) GN=PAS_chr3_0055 PE=4 SV=1
Putative uncharacterized protein OS=Komagataella pastoris (strain GS115 / ATCC 20864) GN=PAS_chr3_1034 PE=4 SV=1
Uncharacterized protein OS=Komagataella pastoris (strain GS115 / ATCC 20864) GN=PAS_chr4_0176 PE=4 SV=1
Putative uncharacterized protein OS=Komagataella pastoris (strain GS115 / ATCC 20864) GN=PAS_chr1-3_0179 PE=4 SV=1
Putative uncharacterized protein OS=Komagataella pastoris (strain GS115 / ATCC 20864) GN=PAS_chr3_0551 PE=4 SV=1
Uncharacterized protein OS=Komagataella pastoris (strain GS115 / ATCC 20864) GN=PAS_chr4_0340 PE=4 SV=1
Putative uncharacterized protein OS=Komagataella pastoris (strain GS115 / ATCC 20864) GN=PAS_chr3_0383 PE=4 SV=1
Putative uncharacterized protein OS=Komagataella pastoris (strain GS115 / ATCC 20864) GN=PAS_chr3_0557 PE=4 SV=1
Phosphoglycerate kinase OS=Komagataella pastoris (strain GS115 / ATCC 20864) GN=PAS_chr1-4_0292 PE=3 SV=1
Minor isoform of tropomyosin, binds to and stabilizes actin cables and filaments OS=Komagataella pastoris (strain GS115 / ATCC 20864) GN=PAS_chr4_0115 PE=4 SV=1
Primary rRNA-binding ribosomal protein component of the large (60S) ribosomal subunit OS=Komagataella pastoris (strain GS115 / ATCC 20864) GN=PAS_chr4_0814 PE=3 SV=1
Cell-cycle checkpoint serine-threonine kinase OS=Komagataella pastoris (strain GS115 / ATCC 20864) GN=PAS_chr2-2_0040 PE=4 SV=1
Uncharacterized protein OS=Komagataella pastoris (strain GS115 / ATCC 20864) GN=PAS_chr4_0948 PE=4 SV=1
Putative uncharacterized protein OS=Komagataella pastoris (strain GS115 / ATCC 20864) GN=PAS_chr2-1_0254 PE=4 SV=1
Membrane-associated protein OS=Komagataella pastoris (strain GS115 / ATCC 20864) GN=PAS_chr1-4_0606 PE=4 SV=1
Putative uncharacterized protein OS=Komagataella pastoris (strain GS115 / ATCC 20864) GN=PAS_chr2-1_0566 PE=4 SV=1
GTPase OS=Komagataella pastoris (strain GS115 / ATCC 20864) GN=PAS_chr1-1_0254 PE=4 SV=1
Transcription coactivator, component of the ADA and SAGA transcriptional adaptor/HAT complexes OS=Komagataella pastoris (strain GS115 / ATCC 20864) GN=PAS_chr2-1_0780 PE=4 SV=1
Uncharacterized protein OS=Komagataella pastoris (strain GS115 / ATCC 20864) GN=PAS_chr4_0635 PE=4 SV=1
Putative uncharacterized protein OS=Komagataella pastoris (strain GS115 / ATCC 20864) GN=PAS_chr1-4_0442 PE=4 SV=1
Putative uncharacterized protein OS=Komagataella pastoris (strain GS115 / ATCC 20864) GN=PAS_chr1-3_0165 PE=4 SV=1
Protein involved in glycosylphosphatidylinositol (GPI) anchor synthesis OS=Komagataella pastoris (strain GS115 / ATCC 20864) GN=PAS_chr2-2_0076 PE=4 SV=1
Putative uncharacterized protein OS=Komagataella pastoris (strain GS115 / ATCC 20864) GN=PAS_chr2-1_0288 PE=4 SV=1
Regulatory, non-ATPase subunit of the 26S proteasome OS=Komagataella pastoris (strain GS115 / ATCC 20864) GN=PAS_chr1-4_0478 PE=4 SV=1
Putative transcription factor OS=Komagataella pastoris (strain GS115 / ATCC 20864) GN=PAS_FragB_0066 PE=4 SV=1
Transmembrane actin-binding protein involved in membrane cytoskeleton assembly and cell polarization OS=Komagataella pastoris (strain GS115 / ATCC 20864) GN=PAS_chr4_0879 PE=4 SV=1
Putative uncharacterized protein OS=Komagataella pastoris (strain GS115 / ATCC 20864) GN=PAS_chr2-1_0861 PE=4 SV=1
Cytoplasmic inorganic pyrophosphatase (PPase) OS=Komagataella pastoris (strain GS115 / ATCC 20864) GN=PAS_chr1-3_0028 PE=4 SV=1
Putative uncharacterized protein OS=Komagataella pastoris (strain GS115 / ATCC 20864) GN=PAS_chr2-1_0077 PE=4 SV=1
t-SNARE protein important for fusion of secretory vesicles with the plasma membrane OS=Komagataella pastoris (strain GS115 / ATCC 20864) GN=PAS_chr2-2_0132 PE=4 SV=1
SH3 domain protein implicated in the regulation of actin polymerization OS=Komagataella pastoris (strain GS115 / ATCC 20864) GN=PAS_chr4_0215 PE=4 SV=1
Putative uncharacterized protein OS=Komagataella pastoris (strain GS115 / ATCC 20864) GN=PAS_chr1-4_0402 PE=4 SV=1
Uncharacterized protein OS=Komagataella pastoris (strain GS115 / ATCC 20864) GN=PAS_chr4_0977 PE=4 SV=1
Component of the CCR4-NOT complex, which has multiple roles in regulating mRNA levels OS=Komagataella pastoris (strain GS115 / ATCC 20864) GN=PAS_chr4_0431 PE=4 SV=1
Nuclear thiol peroxidase, functions as an alkyl-hydroperoxide reductase during post-diauxic growth OS=Komagataella pastoris (strain GS115 / ATCC 20864) GN=PAS_chr1-1_0155 PE=4 SV=1
Putative uncharacterized protein OS=Komagataella pastoris (strain GS115 / ATCC 20864) GN=PAS_chr2-1_0830 PE=4 SV=1
Putative uncharacterized protein OS=Komagataella pastoris (strain GS115 / ATCC 20864) GN=PAS_chr1-4_0155 PE=4 SV=1
Uncharacterized protein OS=Komagataella pastoris (strain GS115 / ATCC 20864) GN=PAS_chr4_0045 PE=4 SV=1
Putative uncharacterized protein OS=Komagataella pastoris (strain GS115 / ATCC 20864) GN=PAS_chr2-1_0809 PE=3 SV=1
Putative uncharacterized protein OS=Komagataella pastoris (strain GS115 / ATCC 20864) GN=PAS_c131_0004 PE=4 SV=1
Putative uncharacterized protein OS=Komagataella pastoris (strain GS115 / ATCC 20864) GN=PAS_chr1-4_0682 PE=4 SV=1
Ran GTPase binding protein OS=Komagataella pastoris (strain GS115 / ATCC 20864) GN=PAS_chr4_0817 PE=4 SV=1
Suppressor protein STM1 OS=Komagataella pastoris (strain GS115 / ATCC 20864) GN=PAS_chr1-4_0297 PE=4 SV=1
Putative uncharacterized protein OS=Komagataella pastoris (strain GS115 / ATCC 20864) GN=PAS_chr1-1_0402 PE=4 SV=1
Protein disulfide isomerase, multifunctional protein resident in the endoplasmic reticulum lumen OS=Komagataella pastoris (strain GS115 / ATCC 20864) GN=PAS_chr4_0844 PE=3 SV=1
Mitochondrial ribosomal protein of the large subunit OS=Komagataella pastoris (strain GS115 / ATCC 20864) GN=PAS_chr4_0388 PE=4 SV=1
Protein component of the large (60S) ribosomal subunit OS=Komagataella pastoris (strain GS115 / ATCC 20864) GN=PAS_chr4_0267 PE=3 SV=1
RNA polymerase III subunit C82 OS=Komagataella pastoris (strain GS115 / ATCC 20864) GN=PAS_chr2-2_0431 PE=4 SV=1
Putative uncharacterized protein OS=Komagataella pastoris (strain GS115 / ATCC 20864) GN=PAS_chr3_0075 PE=4 SV=1
Putative uncharacterized protein OS=Komagataella pastoris (strain GS115 / ATCC 20864) GN=PAS_chr1-1_0260 PE=4 SV=1
Myosin-like protein associated with the nuclear envelope OS=Komagataella pastoris (strain GS115 / ATCC 20864) GN=PAS_chr4_0316 PE=4 SV=1
Specificity factor required for Rsp5p-dependent ubiquitination OS=Komagataella pastoris (strain GS115 / ATCC 20864) GN=PAS_chr2-2_0042 PE=4 SV=1
Inositol hexakisphosphate and inositol heptakisphosphate kinase OS=Komagataella pastoris (strain GS115 / ATCC 20864) GN=PAS_chr1-1_0005 PE=4 SV=1
Putative uncharacterized protein OS=Komagataella pastoris (strain GS115 / ATCC 20864) GN=PAS_chr2-2_0120 PE=4 SV=1
Putative uncharacterized protein OS=Komagataella pastoris (strain GS115 / ATCC 20864) GN=PAS_chr1-4_0290 PE=4 SV=1
Subunit of the CCR4-NOT complex, which is a global transcriptional regulator with roles in transcrip OS=Komagataella pastoris (strain GS115 / ATCC 20864) GN=PAS_chr1-4_0152 PE=4 SV=1
Protein kinase of the PAK/Ste20 kinase family OS=Komagataella pastoris (strain GS115 / ATCC 20864) GN=PAS_chr3_0791 PE=4 SV=1
Subunit of the CCR4-NOT complex OS=Komagataella pastoris (strain GS115 / ATCC 20864) GN=PAS_FragD_0003 PE=4 SV=1
Putative uncharacterized protein OS=Komagataella pastoris (strain GS115 / ATCC 20864) GN=PAS_chr2-1_0871 PE=4 SV=1
Lipid-binding protein, localized to the bud via specific mRNA transport OS=Komagataella pastoris (strain GS115 / ATCC 20864) GN=PAS_chr1-1_0120 PE=4 SV=1
Putative uncharacterized protein OS=Komagataella pastoris (strain GS115 / ATCC 20864) GN=PAS_chr3_1043 PE=4 SV=1
Putative uncharacterized protein OS=Komagataella pastoris (strain GS115 / ATCC 20864) GN=PAS_chr3_1167 PE=3 SV=1
Polyamine transport protein, recognizes spermine, putrescine, and spermidine OS=Komagataella pastoris (strain GS115 / ATCC 20864) GN=PAS_chr4_0836 PE=4 SV=1
Amphiphysin-like lipid raft protein OS=Komagataella pastoris (strain GS115 / ATCC 20864) GN=PAS_chr3_0833 PE=4 SV=1
Putative uncharacterized protein OS=Komagataella pastoris (strain GS115 / ATCC 20864) GN=PAS_chr2-2_0025 PE=4 SV=1
Long chain fatty acyl-CoA synthetase with a preference for C12:0-C16:0 fatty acids OS=Komagataella pastoris (strain GS115 / ATCC 20864) GN=PAS_chr2-1_0785 PE=4 SV=1
Putative uncharacterized protein OS=Komagataella pastoris (strain GS115 / ATCC 20864) GN=PAS_chr1-1_0265 PE=4 SV=1
Phosphotyrosine-specific protein phosphatase OS=Komagataella pastoris (strain GS115 / ATCC 20864) GN=PAS_chr1-3_0061 PE=4 SV=1
Putative ribokinase OS=Komagataella pastoris (strain GS115 / ATCC 20864) GN=PAS_chr3_0604 PE=4 SV=1
Phosphatidylinositol 4-kinase OS=Komagataella pastoris (strain GS115 / ATCC 20864) GN=PAS_chr1-4_0380 PE=4 SV=1
SAGA-associated factor 11 OS=Komagataella pastoris (strain GS115 / ATCC 20864) GN=PAS_chr2-2_0251 PE=3 SV=1
G-protein beta subunit and guanine nucleotide dissociation inhibitor for Gpa2p OS=Komagataella pastoris (strain GS115 / ATCC 20864) GN=PAS_chr1-4_0063 PE=4 SV=1
40S small ribosomal subunit OS=Komagataella pastoris (strain GS115 / ATCC 20864) GN=PAS_chr1-4_0422 PE=3 SV=1
Putative uncharacterized protein OS=Komagataella pastoris (strain GS115 / ATCC 20864) GN=PAS_chr3_1158 PE=4 SV=1
Putative kinase, suppressor of GTPase mutant, similar to bovine rhodopsin kinase OS=Komagataella pastoris (strain GS115 / ATCC 20864) GN=PAS_chr2-1_0028 PE=4 SV=1
Putative uncharacterized protein OS=Komagataella pastoris (strain GS115 / ATCC 20864) GN=PAS_chr3_1217 PE=4 SV=1
Putative uncharacterized protein OS=Komagataella pastoris (strain GS115 / ATCC 20864) GN=PAS_chr3_0772 PE=4 SV=1
Vacuolar membrane protein involved in vacuolar polyphosphate accumulation OS=Komagataella pastoris (strain GS115 / ATCC 20864) GN=PAS_chr2-1_0668 PE=4 SV=1
Protein involved in positive regulation of both 1,3-beta-glucan synthesis and the Pkc1p-MAPK pathway OS=Komagataella pastoris (strain GS115 / ATCC 20864) GN=PAS_chr3_0560 PE=4 SV=1
Protein involved in programmed cell death OS=Komagataella pastoris (strain GS115 / ATCC 20864) GN=PAS_chr1-1_0091 PE=4 SV=1
GTPase-activating protein (RhoGAP) for Cdc42p and Rho5p OS=Komagataella pastoris (strain GS115 / ATCC 20864) GN=PAS_chr4_0629 PE=4 SV=1
Putative uncharacterized protein OS=Komagataella pastoris (strain GS115 / ATCC 20864) GN=PAS_chr1-3_0040 PE=4 SV=1
Outer mitochondrial carnitine acetyltransferase, minor ethanol-inducible enzyme OS=Komagataella pastoris (strain GS115 / ATCC 20864) GN=PAS_chr1-4_0074 PE=3 SV=1
Ser-Thr protein kinase, member (With Ark1p and Prk1p) of the Ark kinase family OS=Komagataella pastoris (strain GS115 / ATCC 20864) GN=PAS_chr3_0940 PE=4 SV=1
Uncharacterized protein OS=Komagataella pastoris (strain GS115 / ATCC 20864) GN=PAS_chr4_0773 PE=4 SV=1
Ubiquitin carboxyl-terminal hydrolase OS=Komagataella pastoris (strain GS115 / ATCC 20864) GN=PAS_chr1-1_0435 PE=3 SV=1
Uncharacterized protein OS=Komagataella pastoris (strain GS115 / ATCC 20864) GN=PAS_chr4_0320 PE=4 SV=1
Multifunctional enzyme HIS4 OS=Komagataella pastoris (strain GS115 / ATCC 20864) GN=PAS_chr1-4_0160 PE=3 SV=1
Nuclear fusion protein BIK1 OS=Komagataella pastoris (strain GS115 / ATCC 20864) GN=PAS_chr1-4_0161 PE=4 SV=1
Protein that localizes to the nucleus and is involved in transcription regulation OS=Komagataella pastoris (strain GS115 / ATCC 20864) GN=PAS_chr3_1109 PE=4 SV=1
Uncharacterized protein OS=Komagataella pastoris (strain GS115 / ATCC 20864) GN=PAS_chr4_0616 PE=4 SV=1
Putative uncharacterized protein OS=Komagataella pastoris (strain GS115 / ATCC 20864) GN=PAS_chr1-4_0137 PE=4 SV=1
High-affinity glucose transporter of the major facilitator superfamily OS=Komagataella pastoris (strain GS115 / ATCC 20864) GN=PAS_chr1-4_0570 PE=3 SV=1
Phosphotyrosine-specific protein phosphatase involved in the inactivation of mitogen-activated prote OS=Komagataella pastoris (strain GS115 / ATCC 20864) GN=PAS_chr2-1_0203 PE=4 SV=1
Putative uncharacterized protein OS=Komagataella pastoris (strain GS115 / ATCC 20864) GN=PAS_c121_0009 PE=4 SV=1
Putative uncharacterized protein OS=Komagataella pastoris (strain GS115 / ATCC 20864) GN=PAS_chr2-2_0394 PE=4 SV=1
Protein whose overexpression affects chromosome stability, potential Cdc28p substrate OS=Komagataella pastoris (strain GS115 / ATCC 20864) GN=PAS_chr1-1_0238 PE=4 SV=1
Delta subunit of the coatomer complex (COPI), which coats Golgi-derived transport vesicles OS=Komagataella pastoris (strain GS115 / ATCC 20864) GN=PAS_chr1-1_0035 PE=4 SV=1
Pheromone-regulated protein, predicted to have 5 transmembrane segments OS=Komagataella pastoris (strain GS115 / ATCC 20864) GN=PAS_chr1-3_0044 PE=4 SV=1
Uncharacterized protein OS=Komagataella pastoris (strain GS115 / ATCC 20864) GN=PAS_FragD_0020 PE=4 SV=1
Nucleolar protein, forms a complex with Noc4p OS=Komagataella pastoris (strain GS115 / ATCC 20864) GN=PAS_chr4_0512 PE=4 SV=1
Reticulon-like protein OS=Komagataella pastoris (strain GS115 / ATCC 20864) GN=PAS_chr1-3_0230 PE=4 SV=1
Uncharacterized protein OS=Komagataella pastoris (strain GS115 / ATCC 20864) GN=PAS_chr4_0462 PE=4 SV=1
Protein kinase required for signal transduction during entry into meiosis OS=Komagataella pastoris (strain GS115 / ATCC 20864) GN=PAS_chr1-4_0368 PE=4 SV=1
Chitin synthase III, catalyzes the transfer of N-acetylglucosamine (GlcNAc) to chitin OS=Komagataella pastoris (strain GS115 / ATCC 20864) GN=PAS_chr2-1_0065 PE=4 SV=1
ER membrane protein involved in a late step of glycosylphosphatidylinositol (GPI) anchor assembly OS=Komagataella pastoris (strain GS115 / ATCC 20864) GN=PAS_chr4_0652 PE=4 SV=1
Putative uncharacterized protein OS=Komagataella pastoris (strain GS115 / ATCC 20864) GN=PAS_chr1-4_0631 PE=4 SV=1
Putative uncharacterized protein OS=Komagataella pastoris (strain GS115 / ATCC 20864) GN=PAS_chr1-1_0266 PE=4 SV=1
Putative uncharacterized protein OS=Komagataella pastoris (strain GS115 / ATCC 20864) GN=PAS_chr3_0477 PE=4 SV=1
Uncharacterized protein OS=Komagataella pastoris (strain GS115 / ATCC 20864) GN=PAS_chr4_0108 PE=4 SV=1
Essential 88kDa subunit of the exocyst complex OS=Komagataella pastoris (strain GS115 / ATCC 20864) GN=PAS_chr1-4_0452 PE=4 SV=1
Putative uncharacterized protein OS=Komagataella pastoris (strain GS115 / ATCC 20864) GN=PAS_chr2-1_0632 PE=4 SV=1
Protein implicated in polar growth, functionally redundant with Boi1p OS=Komagataella pastoris (strain GS115 / ATCC 20864) GN=PAS_chr1-3_0147 PE=4 SV=1
Putative uncharacterized protein OS=Komagataella pastoris (strain GS115 / ATCC 20864) GN=PAS_chr1-3_0027 PE=4 SV=1
Lactose regulatory protein OS=Komagataella pastoris (strain GS115 / ATCC 20864) GN=PAS_FragB_0075 PE=4 SV=1
6-phosphogluconate dehydrogenase, decarboxylating OS=Komagataella pastoris (strain GS115 / ATCC 20864) GN=PAS_chr3_0277 PE=3 SV=1
Ribosomal protein 51 (Rp51) of the small (40s) subunit OS=Komagataella pastoris (strain GS115 / ATCC 20864) GN=PAS_chr2-1_0779 PE=3 SV=1
Phospholipase D, catalyzes the hydrolysis of phosphatidylcholine OS=Komagataella pastoris (strain GS115 / ATCC 20864) GN=PAS_chr3_0646 PE=4 SV=1
Protein kinase OS=Komagataella pastoris (strain GS115 / ATCC 20864) GN=PAS_chr4_0404 PE=4 SV=1
Putative uncharacterized protein OS=Komagataella pastoris (strain GS115 / ATCC 20864) GN=PAS_chr1-3_0169 PE=4 SV=1
Putative uncharacterized protein OS=Komagataella pastoris (strain GS115 / ATCC 20864) GN=PAS_chr3_0837 PE=4 SV=1
General repressor of transcription, forms complex with Cyc8p OS=Komagataella pastoris (strain GS115 / ATCC 20864) GN=PAS_chr3_1001 PE=4 SV=1
Ribosomal protein 59 of small subunit, required for ribosome assembly and 20S pre-rRNA processing OS=Komagataella pastoris (strain GS115 / ATCC 20864) GN=PAS_chr2-1_0481 PE=3 SV=1
Putative uncharacterized protein OS=Komagataella pastoris (strain GS115 / ATCC 20864) GN=PAS_chr1-3_0205 PE=4 SV=1
Mg&lt;sup&gt2+&lt;/sup&gt-dependent phosphatidate (PA) phosphatase OS=Komagataella pastoris (strain GS115 / ATCC 20864) GN=PAS_chr3_0512 PE=4 SV=1
Essential light chain for Myo1p, light chain for Myo2p OS=Komagataella pastoris (strain GS115 / ATCC 20864) GN=PAS_chr2-1_0733 PE=4 SV=1
Subunit E of the eight-subunit V1 peripheral membrane domain of the vacuolar H+-ATPase (V-ATPase) OS=Komagataella pastoris (strain GS115 / ATCC 20864) GN=PAS_chr3_0704 PE=3 SV=1
Uncharacterized protein OS=Komagataella pastoris (strain GS115 / ATCC 20864) GN=PAS_chr4_0925 PE=4 SV=1
Putative uncharacterized protein OS=Komagataella pastoris (strain GS115 / ATCC 20864) GN=PAS_chr1-4_0265 PE=4 SV=1
General amino acid permease OS=Komagataella pastoris (strain GS115 / ATCC 20864) GN=PAS_chr1-1_0203 PE=4 SV=1
Putative uncharacterized protein OS=Komagataella pastoris (strain GS115 / ATCC 20864) GN=PAS_chr2-1_0812 PE=4 SV=1
Protein tyrosine phosphatase involved in cell cycle control OS=Komagataella pastoris (strain GS115 / ATCC 20864) GN=PAS_chr1-1_0273 PE=4 SV=1
Plasma membrane ATP binding cassette (ABC) transporter OS=Komagataella pastoris (strain GS115 / ATCC 20864) GN=PAS_chr1-1_0398 PE=3 SV=1
Putative uncharacterized protein OS=Komagataella pastoris (strain GS115 / ATCC 20864) GN=PAS_chr2-1_0444 PE=4 SV=1
Homodimeric Zn2Cys6 zinc finger transcription factor OS=Komagataella pastoris (strain GS115 / ATCC 20864) GN=PAS_chr2-1_0511 PE=4 SV=1
Subunit of the anaphase-promoting complex/cyclosome (APC/C) OS=Komagataella pastoris (strain GS115 / ATCC 20864) GN=PAS_chr1-4_0197 PE=4 SV=1
Putative uncharacterized protein OS=Komagataella pastoris (strain GS115 / ATCC 20864) GN=PAS_chr2-2_0231 PE=4 SV=1
Oxysterol-binding protein OS=Komagataella pastoris (strain GS115 / ATCC 20864) GN=PAS_chr1-4_0646 PE=3 SV=1
Heat shock protein OS=Komagataella pastoris (strain GS115 / ATCC 20864) GN=PAS_c034_0029 PE=3 SV=1
Uncharacterized protein OS=Komagataella pastoris (strain GS115 / ATCC 20864) GN=PAS_chr4_0235 PE=4 SV=1
Putative transcription factor containing a zinc finger OS=Komagataella pastoris (strain GS115 / ATCC 20864) GN=PAS_chr3_0407 PE=4 SV=1
Putative uncharacterized protein OS=Komagataella pastoris (strain GS115 / ATCC 20864) GN=PAS_chr3_1141 PE=4 SV=1
Vacuolar protein sorting protein OS=Komagataella pastoris (strain GS115 / ATCC 20864) GN=PAS_chr1-4_0657 PE=4 SV=1
Autophagy-related protein 3 OS=Komagataella pastoris (strain GS115 / ATCC 20864) GN=PAS_chr3_0688 PE=3 SV=1
Putative uncharacterized protein OS=Komagataella pastoris (strain GS115 / ATCC 20864) GN=PAS_chr2-1_0827 PE=4 SV=1
Uncharacterized protein OS=Komagataella pastoris (strain GS115 / ATCC 20864) GN=PAS_chr4_0504 PE=4 SV=1
Cis-golgi GTPase-activating protein (GAP) OS=Komagataella pastoris (strain GS115 / ATCC 20864) GN=PAS_chr1-3_0219 PE=4 SV=1
Putative uncharacterized protein OS=Komagataella pastoris (strain GS115 / ATCC 20864) GN=PAS_chr3_1213 PE=4 SV=1
Protein with a positive role in the multivesicular body sorting pathway OS=Komagataella pastoris (strain GS115 / ATCC 20864) GN=PAS_chr1-1_0369 PE=4 SV=1
Essential nucleolar protein that is a component of the SSU (Small subunit) processome OS=Komagataella pastoris (strain GS115 / ATCC 20864) GN=PAS_chr3_0683 PE=4 SV=1
Specificity factor required for Rsp5p-dependent ubiquitination and sorting of cargo proteins OS=Komagataella pastoris (strain GS115 / ATCC 20864) GN=PAS_chr3_0508 PE=4 SV=1
Putative uncharacterized protein OS=Komagataella pastoris (strain GS115 / ATCC 20864) GN=PAS_chr3_1038 PE=4 SV=1
Putative uncharacterized protein OS=Komagataella pastoris (strain GS115 / ATCC 20864) GN=PAS_chr1-4_0530 PE=4 SV=1
Diacylglycerol kinase, localized to the endoplasmic reticulum (ER) OS=Komagataella pastoris (strain GS115 / ATCC 20864) GN=PAS_chr3_0072 PE=4 SV=1
Protein required for beta-1,6 glucan biosynthesis OS=Komagataella pastoris (strain GS115 / ATCC 20864) GN=PAS_chr4_0508 PE=4 SV=1
Putative uncharacterized protein OS=Komagataella pastoris (strain GS115 / ATCC 20864) GN=PAS_chr1-4_0658 PE=4 SV=1
Component of a membrane-bound complex containing the Tor2p kinase and other proteins OS=Komagataella pastoris (strain GS115 / ATCC 20864) GN=PAS_chr3_0162 PE=4 SV=1
Homocitrate synthase isozyme, catalyzes the condensation of acetyl-CoA and alpha-ketoglutarate OS=Komagataella pastoris (strain GS115 / ATCC 20864) GN=PAS_chr1-1_0313 PE=3 SV=1
Putative uncharacterized protein OS=Komagataella pastoris (strain GS115 / ATCC 20864) GN=PAS_chr2-1_0475 PE=4 SV=1
Subunit a of vacuolar-ATPase V0 domain, one of two isoforms (Vph1p and Stv1p) OS=Komagataella pastoris (strain GS115 / ATCC 20864) GN=PAS_chr1-3_0066 PE=4 SV=1
Beta-adaptin, large subunit of the clathrin associated protein complex (AP-2) OS=Komagataella pastoris (strain GS115 / ATCC 20864) GN=PAS_chr3_0079 PE=4 SV=1
Glucose-6-phosphate isomerase OS=Komagataella pastoris (strain GS115 / ATCC 20864) GN=PAS_chr3_0456 PE=3 SV=1
Phosphoenolpyruvate carboxykinase OS=Komagataella pastoris (strain GS115 / ATCC 20864) GN=PAS_FragB_0061 PE=3 SV=1
Target membrane receptor (T-SNARE) OS=Komagataella pastoris (strain GS115 / ATCC 20864) GN=PAS_chr2-2_0350 PE=4 SV=1
ATP-dependent RNA helicase of the SFI superfamily, required for nonsense mediated mRNA decay and for OS=Komagataella pastoris (strain GS115 / ATCC 20864) GN=PAS_chr3_0657 PE=4 SV=1
3-isopropylmalate dehydratase OS=Komagataella pastoris (strain GS115 / ATCC 20864) GN=PAS_chr2-1_0368 PE=3 SV=1
Uncharacterized protein OS=Komagataella pastoris (strain GS115 / ATCC 20864) GN=PAS_chr4_0851 PE=4 SV=1
N-terminally acetylated ribosomal protein L37 of the large (60S) ribosomal subunit OS=Komagataella pastoris (strain GS115 / ATCC 20864) GN=PAS_chr1-4_0275 PE=4 SV=1
General transcriptional co-repressor, acts together with Tup1p OS=Komagataella pastoris (strain GS115 / ATCC 20864) GN=PAS_chr2-1_0762 PE=4 SV=1
DNA-directed RNA polymerase OS=Komagataella pastoris (strain GS115 / ATCC 20864) GN=PAS_chr2-1_0125 PE=3 SV=1
Autophagy-related protein 28 OS=Komagataella pastoris (strain GS115 / ATCC 20864) GN=ATG28 PE=1 SV=1
Probable catalytic subunit of a mannosylinositol phosphorylceramide (MIPC) synthase OS=Komagataella pastoris (strain GS115 / ATCC 20864) GN=PAS_chr1-3_0218 PE=4 SV=1
Putative uncharacterized protein OS=Komagataella pastoris (strain GS115 / ATCC 20864) GN=PAS_chr2-1_0849 PE=4 SV=1
Putative uncharacterized protein OS=Komagataella pastoris (strain GS115 / ATCC 20864) GN=PAS_FragB_0073 PE=4 SV=1
Sensor of mitochondrial dysfunction OS=Komagataella pastoris (strain GS115 / ATCC 20864) GN=PAS_chr3_0452 PE=4 SV=1
Uncharacterized protein OS=Komagataella pastoris (strain GS115 / ATCC 20864) GN=PAS_chr4_0126 PE=4 SV=1
Subunit of the Hat1p-Hat2p histone acetyltransferase complex OS=Komagataella pastoris (strain GS115 / ATCC 20864) GN=PAS_chr2-1_0271 PE=4 SV=1
Protein involved in the HOG (High osmolarity glycerol) pathway OS=Komagataella pastoris (strain GS115 / ATCC 20864) GN=PAS_chr1-3_0267 PE=4 SV=1
Putative uncharacterized protein OS=Komagataella pastoris (strain GS115 / ATCC 20864) GN=PAS_chr1-1_0471 PE=4 SV=1
Putative uncharacterized protein OS=Komagataella pastoris (strain GS115 / ATCC 20864) GN=PAS_chr3_1009 PE=4 SV=1
Protein required for pre-rRNA processing and 40S ribosomal subunit assembly OS=Komagataella pastoris (strain GS115 / ATCC 20864) GN=PAS_chr3_0204 PE=4 SV=1
Apyrase with wide substrate specificity OS=Komagataella pastoris (strain GS115 / ATCC 20864) GN=PAS_chr1-1_0063 PE=3 SV=1
Evolutionarily conserved protein with similarity to Orm2p OS=Komagataella pastoris (strain GS115 / ATCC 20864) GN=PAS_chr4_0427 PE=4 SV=1
Transcription cofactor, forms complexes with DNA-binding proteins Swi4p and Mbp1p OS=Komagataella pastoris (strain GS115 / ATCC 20864) GN=PAS_chr4_0634 PE=4 SV=1
Putative uncharacterized protein OS=Komagataella pastoris (strain GS115 / ATCC 20864) GN=PAS_chr2-2_0454 PE=4 SV=1
Uncharacterized protein OS=Komagataella pastoris (strain GS115 / ATCC 20864) GN=PAS_chr4_0410 PE=4 SV=1
Putative uncharacterized protein OS=Komagataella pastoris (strain GS115 / ATCC 20864) GN=PAS_chr2-1_0531 PE=4 SV=1
Putative uncharacterized protein OS=Komagataella pastoris (strain GS115 / ATCC 20864) GN=PAS_chr3_0666 PE=4 SV=1
Putative uncharacterized protein OS=Komagataella pastoris (strain GS115 / ATCC 20864) GN=PAS_chr1-4_0140 PE=4 SV=1
Protein component of the small (40S) ribosomal subunit OS=Komagataella pastoris (strain GS115 / ATCC 20864) GN=PAS_chr2-1_0783 PE=3 SV=1
Putative uncharacterized protein OS=Komagataella pastoris (strain GS115 / ATCC 20864) GN=PAS_chr3_0504 PE=4 SV=1
Cytoplasmic component of the nuclear aminoacylation-dependent tRNA export pathway OS=Komagataella pastoris (strain GS115 / ATCC 20864) GN=PAS_chr4_0200 PE=4 SV=1
Conserved ribosomal protein P0 similar to rat P0, human P0, and E. coli L10e OS=Komagataella pastoris (strain GS115 / ATCC 20864) GN=PAS_chr1-3_0068 PE=3 SV=1
E1 alpha subunit of the pyruvate dehydrogenase (PDH) complex OS=Komagataella pastoris (strain GS115 / ATCC 20864) GN=PAS_chr2-2_0294 PE=4 SV=1
Putative uncharacterized protein OS=Komagataella pastoris (strain GS115 / ATCC 20864) GN=PAS_chr2-2_0419 PE=4 SV=1
Ubl (Ubiquitin-like protein)-specific protease that cleaves Smt3p protein conjugates OS=Komagataella pastoris (strain GS115 / ATCC 20864) GN=PAS_chr2-2_0097 PE=4 SV=1
Putative uncharacterized protein OS=Komagataella pastoris (strain GS115 / ATCC 20864) GN=PAS_chr1-4_0667 PE=4 SV=1
Subunit beta1 of the nascent polypeptide-associated complex (NAC) involved in protein targeting OS=Komagataella pastoris (strain GS115 / ATCC 20864) GN=PAS_chr1-3_0172 PE=4 SV=1
Beta (RNA 5~-triphosphatase) subunit of the mRNA capping enzyme OS=Komagataella pastoris (strain GS115 / ATCC 20864) GN=PAS_chr3_0609 PE=4 SV=1
Constituent of Paf1 complex with RNA polymerase II, Paf1p, Hpr1p, Ctr9, Leo1, Rtf1 and Ccr4p OS=Komagataella pastoris (strain GS115 / ATCC 20864) GN=PAS_chr2-1_0674 PE=4 SV=1
Putative uncharacterized protein OS=Komagataella pastoris (strain GS115 / ATCC 20864) GN=PAS_chr2-1_0260 PE=4 SV=1
Polo-like kinase with similarity to Xenopus Plx1 and S. pombe Plo1p OS=Komagataella pastoris (strain GS115 / ATCC 20864) GN=PAS_chr3_0243 PE=4 SV=1
3-deoxy-D-arabino-heptulosonate-7-phosphate (DAHP) synthase OS=Komagataella pastoris (strain GS115 / ATCC 20864) GN=PAS_chr2-1_0473 PE=4 SV=1
Putative uncharacterized protein OS=Komagataella pastoris (strain GS115 / ATCC 20864) GN=PAS_FragB_0072 PE=4 SV=1
P-type ATPase sodium pump, involved in Na+ and Li+ efflux to allow salt tolerance OS=Komagataella pastoris (strain GS115 / ATCC 20864) GN=PAS_chr1-1_0428 PE=3 SV=1
Uncharacterized protein OS=Komagataella pastoris (strain GS115 / ATCC 20864) GN=PAS_chr4_0549 PE=4 SV=1
Essential N-acetylglucosamine-phosphate mutase OS=Komagataella pastoris (strain GS115 / ATCC 20864) GN=PAS_chr1-1_0067 PE=3 SV=1
Mitochondrial peroxiredoxin (1-Cys Prx) with thioredoxin peroxidase activity OS=Komagataella pastoris (strain GS115 / ATCC 20864) GN=PAS_chr1-1_0433 PE=4 SV=1
Subunit of the SWI/SNF chromatin remodeling complex OS=Komagataella pastoris (strain GS115 / ATCC 20864) GN=PAS_chr1-4_0309 PE=4 SV=1
Myo-inositol transporter with strong similarity to the major myo-inositol transporter Itr1p OS=Komagataella pastoris (strain GS115 / ATCC 20864) GN=PAS_chr2-1_0489 PE=3 SV=1
Multistep regulator of cAMP-PKA signaling OS=Komagataella pastoris (strain GS115 / ATCC 20864) GN=PAS_chr1-1_0042 PE=4 SV=1
Putative uncharacterized protein OS=Komagataella pastoris (strain GS115 / ATCC 20864) GN=PAS_chr1-1_0101 PE=4 SV=1
Putative uncharacterized protein OS=Komagataella pastoris (strain GS115 / ATCC 20864) GN=PAS_chr1-4_0628 PE=4 SV=1
Uncharacterized protein OS=Komagataella pastoris (strain GS115 / ATCC 20864) GN=PAS_chr4_0926 PE=4 SV=1
Putative ATPase of the AAA family OS=Komagataella pastoris (strain GS115 / ATCC 20864) GN=PAS_chr4_0241 PE=4 SV=1
Putative uncharacterized protein OS=Komagataella pastoris (strain GS115 / ATCC 20864) GN=PAS_chr1-3_0265 PE=4 SV=1
Ribosomal stalk protein P1 alpha OS=Komagataella pastoris (strain GS115 / ATCC 20864) GN=PAS_chr4_0412 PE=3 SV=1
Subunit of the heterodimeric FACT complex (Spt16p-Pob3p) OS=Komagataella pastoris (strain GS115 / ATCC 20864) GN=PAS_chr1-1_0018 PE=4 SV=1
Fimbrin, actin-bundling protein OS=Komagataella pastoris (strain GS115 / ATCC 20864) GN=PAS_chr2-1_0631 PE=4 SV=1
Vacuolar transporter, exports large neutral amino acids from the vacuole OS=Komagataella pastoris (strain GS115 / ATCC 20864) GN=PAS_chr2-2_0343 PE=4 SV=1
Component of the mitotic spindle that binds to interpolar microtubules OS=Komagataella pastoris (strain GS115 / ATCC 20864) GN=PAS_chr3_0913 PE=4 SV=1
Essential conserved nucleolar GTP-binding protein required for synthesis of 40S ribosomal subunits OS=Komagataella pastoris (strain GS115 / ATCC 20864) GN=PAS_chr1-1_0179 PE=4 SV=1
N-terminally acetylated protein component of the large (60S) ribosomal subunit, binds to 5.8 S rRNA OS=Komagataella pastoris (strain GS115 / ATCC 20864) GN=PAS_chr4_0208 PE=3 SV=1
Protein kinase involved in transcriptional activation of osmostress-responsive genes OS=Komagataella pastoris (strain GS115 / ATCC 20864) GN=PAS_chr3_0893 PE=4 SV=1
Glc7-interacting protein whose overexpression relocalizes Glc7p from the nucleus OS=Komagataella pastoris (strain GS115 / ATCC 20864) GN=PAS_chr1-1_0346 PE=4 SV=1
Putative uncharacterized protein OS=Komagataella pastoris (strain GS115 / ATCC 20864) GN=PAS_chr2-1_0151 PE=4 SV=1
Protein that interacts with Cdc48p and Npl4p, involved in recognition of polyubiquitinated proteins OS=Komagataella pastoris (strain GS115 / ATCC 20864) GN=PAS_chr1-1_0367 PE=4 SV=1
Protein serine/threonine/tyrosine (Dual-specificity) kinase OS=Komagataella pastoris (strain GS115 / ATCC 20864) GN=PAS_chr4_0812 PE=4 SV=1
Putative uncharacterized protein OS=Komagataella pastoris (strain GS115 / ATCC 20864) GN=PAS_chr2-1_0599 PE=4 SV=1
Protein component of the small (40S) ribosomal subunit OS=Komagataella pastoris (strain GS115 / ATCC 20864) GN=PAS_chr1-3_0115 PE=3 SV=1
Primary component of eisosomes OS=Komagataella pastoris (strain GS115 / ATCC 20864) GN=PAS_chr3_0227 PE=4 SV=1
Putative uncharacterized protein OS=Komagataella pastoris (strain GS115 / ATCC 20864) GN=PAS_chr1-4_0375 PE=4 SV=1
GTPase activating protein (GAP) for Rho1p, involved in signaling to the actin cytoskeleton, null mut OS=Komagataella pastoris (strain GS115 / ATCC 20864) GN=PAS_chr2-1_0118 PE=4 SV=1
Protein with ubiquitin-like N terminus, recognizes and binds damaged DNA (With Rad4p) OS=Komagataella pastoris (strain GS115 / ATCC 20864) GN=PAS_chr2-2_0445 PE=4 SV=1
Aconitase, required for the tricarboxylic acid (TCA) cycle and also independently required for mitoc OS=Komagataella pastoris (strain GS115 / ATCC 20864) GN=PAS_chr1-3_0104 PE=4 SV=1
Protein required for normal mitochondrial morphology, has similarity to hemolysins OS=Komagataella pastoris (strain GS115 / ATCC 20864) GN=PAS_chr2-2_0173 PE=4 SV=1
Putative uncharacterized protein OS=Komagataella pastoris (strain GS115 / ATCC 20864) GN=PAS_chr1-4_0693 PE=4 SV=1
P-loop ATPase with similarity to human OLA1 and bacterial YchF OS=Komagataella pastoris (strain GS115 / ATCC 20864) GN=PAS_chr4_0226 PE=3 SV=1
TFIID subunit (145 kDa) OS=Komagataella pastoris (strain GS115 / ATCC 20864) GN=PAS_chr1-4_0012 PE=4 SV=1
Exonuclease component of the nuclear exosome OS=Komagataella pastoris (strain GS115 / ATCC 20864) GN=PAS_chr1-4_0108 PE=4 SV=1
Component of the CCR4-NOT complex, which has multiple roles in regulating mRNA levels OS=Komagataella pastoris (strain GS115 / ATCC 20864) GN=PAS_chr2-1_0494 PE=4 SV=1
Putative uncharacterized protein OS=Komagataella pastoris (strain GS115 / ATCC 20864) GN=PAS_chr1-3_0097 PE=4 SV=1
Translation initiation factor eIF-5 OS=Komagataella pastoris (strain GS115 / ATCC 20864) GN=PAS_chr4_0771 PE=4 SV=1
Putative uncharacterized protein OS=Komagataella pastoris (strain GS115 / ATCC 20864) GN=PAS_chr1-3_0096 PE=4 SV=1
Phosphatidylserine synthase, functions in phospholipid biosynthesis OS=Komagataella pastoris (strain GS115 / ATCC 20864) GN=PAS_chr1-1_0420 PE=3 SV=1
Coproporphyrinogen III oxidase, an oxygen requiring enzyme OS=Komagataella pastoris (strain GS115 / ATCC 20864) GN=PAS_chr3_0943 PE=4 SV=1
Protein required for fusion of cvt-vesicles and autophagosomes with the vacuole OS=Komagataella pastoris (strain GS115 / ATCC 20864) GN=PAS_chr3_1107 PE=4 SV=1
Essential evolutionarily-conserved nucleolar protein component of the box C/D snoRNP complexes OS=Komagataella pastoris (strain GS115 / ATCC 20864) GN=PAS_chr1-4_0403 PE=4 SV=1
Uncharacterized protein OS=Komagataella pastoris (strain GS115 / ATCC 20864) GN=PAS_chr4_0694 PE=4 SV=1
Putative uncharacterized protein OS=Komagataella pastoris (strain GS115 / ATCC 20864) GN=PAS_chr2-1_0477 PE=4 SV=1
Putative uncharacterized protein OS=Komagataella pastoris (strain GS115 / ATCC 20864) GN=PAS_chr1-4_0224 PE=4 SV=1
Aminophospholipid translocase (Flippase) that localizes primarily to the plasma membrane OS=Komagataella pastoris (strain GS115 / ATCC 20864) GN=PAS_chr2-1_0756 PE=4 SV=1
Uncharacterized protein OS=Komagataella pastoris (strain GS115 / ATCC 20864) GN=PAS_chr4_0411 PE=4 SV=1
Nucleolar protein required for 60S ribosomal subunit biogenesis OS=Komagataella pastoris (strain GS115 / ATCC 20864) GN=PAS_chr3_1036 PE=4 SV=1
Cystathionine gamma-synthase, converts cysteine into cystathionine OS=Komagataella pastoris (strain GS115 / ATCC 20864) GN=PAS_chr2-1_0752 PE=3 SV=1
Serine-threonine protein kinase that is part of a glucose-sensing system OS=Komagataella pastoris (strain GS115 / ATCC 20864) GN=PAS_chr2-2_0103 PE=4 SV=1
Putative uncharacterized protein OS=Komagataella pastoris (strain GS115 / ATCC 20864) GN=PAS_chr2-1_0463 PE=4 SV=1
Putative uncharacterized protein OS=Komagataella pastoris (strain GS115 / ATCC 20864) GN=PAS_chr3_0161 PE=4 SV=1
Putative uncharacterized protein OS=Komagataella pastoris (strain GS115 / ATCC 20864) GN=PAS_chr2-2_0208 PE=4 SV=1
Low affinity vacuolar membrane localized monovalent cation/H+ antiporter OS=Komagataella pastoris (strain GS115 / ATCC 20864) GN=PAS_chr4_0647 PE=4 SV=1
Pho85p cyclin of the Pho80p subfamily, forms a functional kinase complex with Pho85p OS=Komagataella pastoris (strain GS115 / ATCC 20864) GN=PAS_chr1-4_0236 PE=4 SV=1
Cytoplasmic response regulator, part of a two-component signal transducer that mediates osmosensing OS=Komagataella pastoris (strain GS115 / ATCC 20864) GN=PAS_chr3_0849 PE=4 SV=1
Phospho-2-dehydro-3-deoxyheptonate aldolase OS=Komagataella pastoris (strain GS115 / ATCC 20864) GN=PAS_chr1-4_0218 PE=3 SV=1
RNA helicase in the DEAH-box family involved in the second catalytic step of splicing, exhibits ATP- OS=Komagataella pastoris (strain GS115 / ATCC 20864) GN=PAS_chr1-4_0208 PE=4 SV=1
Ubiquitin carboxyl-terminal hydrolase OS=Komagataella pastoris (strain GS115 / ATCC 20864) GN=PAS_chr3_0605 PE=3 SV=1
Putative uncharacterized protein OS=Komagataella pastoris (strain GS115 / ATCC 20864) GN=PAS_chr1-1_0470 PE=4 SV=1
Suppressor of sphingoid long chain base (LCB) sensitivity of an LCB-lyase mutation OS=Komagataella pastoris (strain GS115 / ATCC 20864) GN=PAS_chr4_0498 PE=4 SV=1
TFIID subunit (67 kDa), involved in RNA polymerase II transcription initiation OS=Komagataella pastoris (strain GS115 / ATCC 20864) GN=PAS_FragD_0016 PE=4 SV=1
Putative uncharacterized protein OS=Komagataella pastoris (strain GS115 / ATCC 20864) GN=PAS_chr3_0405 PE=4 SV=1
Elongation factor 1-alpha OS=Komagataella pastoris (strain GS115 / ATCC 20864) GN=PAS_FragB_0052 PE=3 SV=1
Prenyltransferase, required for cell viability OS=Komagataella pastoris (strain GS115 / ATCC 20864) GN=PAS_chr1-1_0301 PE=4 SV=1
Protein VTS1 OS=Komagataella pastoris (strain GS115 / ATCC 20864) GN=PAS_FragB_0007 PE=4 SV=1
Transcription elongation factor OS=Komagataella pastoris (strain GS115 / ATCC 20864) GN=PAS_chr4_0308 PE=4 SV=1
Uncharacterized protein OS=Komagataella pastoris (strain GS115 / ATCC 20864) GN=PAS_chr4_0519 PE=4 SV=1
Microtubule-associated protein (MAP) of the XMAP215/Dis1 family OS=Komagataella pastoris (strain GS115 / ATCC 20864) GN=PAS_chr4_0282 PE=4 SV=1
Uncharacterized transporter OS=Komagataella pastoris (strain GS115 / ATCC 20864) GN=PAS_FragB_0050 PE=4 SV=1
Essential DEAH-box ATP-dependent RNA helicase specific to the U3 snoRNP OS=Komagataella pastoris (strain GS115 / ATCC 20864) GN=PAS_chr3_0344 PE=4 SV=1
Similar to globins and has a functional heme-binding domain OS=Komagataella pastoris (strain GS115 / ATCC 20864) GN=PAS_chr4_0562 PE=4 SV=1
Deubiquitinating enzyme anchored to the outer mitochondrial membrane OS=Komagataella pastoris (strain GS115 / ATCC 20864) GN=PAS_chr4_0174 PE=4 SV=1
Putative uncharacterized protein OS=Komagataella pastoris (strain GS115 / ATCC 20864) GN=PAS_chr2-1_0276 PE=4 SV=1
Putative uncharacterized protein OS=Komagataella pastoris (strain GS115 / ATCC 20864) GN=PAS_chr3_1113 PE=4 SV=1
Putative uncharacterized protein OS=Komagataella pastoris (strain GS115 / ATCC 20864) GN=PAS_chr3_0778 PE=4 SV=1
Component of the septin ring of the mother-bud neck that is required for cytokinesis OS=Komagataella pastoris (strain GS115 / ATCC 20864) GN=PAS_chr4_0548 PE=3 SV=1
Protein kinase involved in the response to oxidative and osmotic stress OS=Komagataella pastoris (strain GS115 / ATCC 20864) GN=PAS_chr2-2_0332 PE=4 SV=1
Importin subunit alpha OS=Komagataella pastoris (strain GS115 / ATCC 20864) GN=PAS_chr3_0612 PE=3 SV=1
Protein with a role in maintenance of cellular integrity OS=Komagataella pastoris (strain GS115 / ATCC 20864) GN=PAS_chr2-2_0414 PE=4 SV=1
Uncharacterized protein OS=Komagataella pastoris (strain GS115 / ATCC 20864) GN=PAS_chr4_0855 PE=4 SV=1
Putative uncharacterized protein OS=Komagataella pastoris (strain GS115 / ATCC 20864) GN=PAS_chr3_1233 PE=4 SV=1
Mitochondrial alcohol dehydrogenase isozyme III OS=Komagataella pastoris (strain GS115 / ATCC 20864) GN=PAS_chr2-1_0472 PE=3 SV=1
Component of the exomer complex, which also contains Csh6p, Bch1p, Bch2p, and Bud7p OS=Komagataella pastoris (strain GS115 / ATCC 20864) GN=PAS_chr4_0675 PE=4 SV=1
Putative uncharacterized protein OS=Komagataella pastoris (strain GS115 / ATCC 20864) GN=PAS_chr1-4_0527 PE=4 SV=1
Putative uncharacterized protein OS=Komagataella pastoris (strain GS115 / ATCC 20864) GN=PAS_chr3_0952 PE=4 SV=1
Protein serine/threonine kinase OS=Komagataella pastoris (strain GS115 / ATCC 20864) GN=PAS_chr2-1_0460 PE=4 SV=1
Largest subunit of the Anaphase-Promoting Complex/Cyclosome (APC/C) OS=Komagataella pastoris (strain GS115 / ATCC 20864) GN=PAS_chr1-4_0020 PE=4 SV=1
Translation initiation factor eIF4G, subunit of the mRNA cap-binding protein complex (EIF4F) OS=Komagataella pastoris (strain GS115 / ATCC 20864) GN=PAS_chr1-1_0053 PE=4 SV=1
Mitochondrial protein required for assembly of ubiquinol cytochrome-c reductase complex (Cytochrome) OS=Komagataella pastoris (strain GS115 / ATCC 20864) GN=PAS_chr2-1_0214 PE=4 SV=1
Carbonic anhydrase OS=Komagataella pastoris (strain GS115 / ATCC 20864) GN=PAS_chr4_0578 PE=3 SV=1
Transcription factor OS=Komagataella pastoris (strain GS115 / ATCC 20864) GN=PAS_chr4_0887 PE=4 SV=1
Conserved cysteine protease required for autophagy OS=Komagataella pastoris (strain GS115 / ATCC 20864) GN=PAS_chr1-4_0522 PE=4 SV=1
Putative uncharacterized protein OS=Komagataella pastoris (strain GS115 / ATCC 20864) GN=PAS_chr2-2_0495 PE=4 SV=1
Uncharacterized protein OS=Komagataella pastoris (strain GS115 / ATCC 20864) GN=PAS_chr4_0969 PE=4 SV=1
ATPase involved in protein folding and the response to stress OS=Komagataella pastoris (strain GS115 / ATCC 20864) GN=PAS_chr3_0230 PE=3 SV=1
Putative uncharacterized protein OS=Komagataella pastoris (strain GS115 / ATCC 20864) GN=PAS_chr3_1206 PE=4 SV=1
Subunit of TORC1, a rapamycin-sensitive complex involved in growth control OS=Komagataella pastoris (strain GS115 / ATCC 20864) GN=PAS_chr2-1_0459 PE=4 SV=1
Protein involved in the organization of the actin cytoskeleton OS=Komagataella pastoris (strain GS115 / ATCC 20864) GN=PAS_chr3_0795 PE=4 SV=1
Protein involved in regulated synthesis of PtdIns(3,5)P(2) OS=Komagataella pastoris (strain GS115 / ATCC 20864) GN=PAS_chr1-4_0508 PE=4 SV=1
Homeobox transcription factor OS=Komagataella pastoris (strain GS115 / ATCC 20864) GN=PAS_chr2-2_0043 PE=3 SV=1
Component of the Paf1p complex OS=Komagataella pastoris (strain GS115 / ATCC 20864) GN=PAS_chr3_1035 PE=4 SV=1
Conserved nuclear RNA-binding protein OS=Komagataella pastoris (strain GS115 / ATCC 20864) GN=PAS_chr1-4_0335 PE=4 SV=1
Uncharacterized protein OS=Komagataella pastoris (strain GS115 / ATCC 20864) GN=PAS_chr4_0161 PE=4 SV=1
Constituent of 66S pre-ribosomal particles, required for large (60S) ribosomal subunit biogenesis OS=Komagataella pastoris (strain GS115 / ATCC 20864) GN=PAS_chr3_0094 PE=4 SV=1
Protein kinase with similarityto serine/threonine protein kinase Ypk1p OS=Komagataella pastoris (strain GS115 / ATCC 20864) GN=PAS_chr3_0127 PE=4 SV=1
Protein involved in bud-site selection and required for axial budding pattern OS=Komagataella pastoris (strain GS115 / ATCC 20864) GN=PAS_chr3_0331 PE=4 SV=1
Transcriptional activator OS=Komagataella pastoris (strain GS115 / ATCC 20864) GN=PAS_chr1-4_0336 PE=4 SV=1
Putative uncharacterized protein OS=Komagataella pastoris (strain GS115 / ATCC 20864) GN=PAS_chr3_0067 PE=4 SV=1
Nucleotide exchange factor for Gsp1p, localizes to the nucleus OS=Komagataella pastoris (strain GS115 / ATCC 20864) GN=PAS_chr4_0702 PE=4 SV=1
Ser/Thr kinase involved in transcription and stress response OS=Komagataella pastoris (strain GS115 / ATCC 20864) GN=PAS_chr3_0752 PE=4 SV=1
Putative uncharacterized protein OS=Komagataella pastoris (strain GS115 / ATCC 20864) GN=PAS_chr3_1240 PE=4 SV=1
ATP synthase subunit beta OS=Komagataella pastoris (strain GS115 / ATCC 20864) GN=PAS_chr2-2_0165 PE=3 SV=1
Putative uncharacterized protein OS=Komagataella pastoris (strain GS115 / ATCC 20864) GN=PAS_chr3_0494 PE=4 SV=1
Forkhead family transcription factor with a major role in the expression of G2/M phase genes OS=Komagataella pastoris (strain GS115 / ATCC 20864) GN=PAS_chr4_0205 PE=4 SV=1
Protein component of the large (60S) ribosomal subunit OS=Komagataella pastoris (strain GS115 / ATCC 20864) GN=PAS_chr2-2_0229 PE=4 SV=1
Putative uncharacterized protein OS=Komagataella pastoris (strain GS115 / ATCC 20864) GN=PAS_chr3_1154 PE=4 SV=1
Thioredoxin peroxidase, acts as both a ribosome-associated and free cytoplasmic antioxidant OS=Komagataella pastoris (strain GS115 / ATCC 20864) GN=PAS_chr2-2_0220 PE=4 SV=1
Putative uncharacterized protein OS=Komagataella pastoris (strain GS115 / ATCC 20864) GN=PAS_chr3_0510 PE=4 SV=1
Putative uncharacterized protein OS=Komagataella pastoris (strain GS115 / ATCC 20864) GN=PAS_chr3_0705 PE=4 SV=1
Cytoplasmic pre-60S factor OS=Komagataella pastoris (strain GS115 / ATCC 20864) GN=PAS_chr1-1_0031 PE=4 SV=1
Putative uncharacterized protein OS=Komagataella pastoris (strain GS115 / ATCC 20864) GN=PAS_chr1-4_0698 PE=4 SV=1
Serine/threonine protein kinase, subunit of the transcription factor TFIIH OS=Komagataella pastoris (strain GS115 / ATCC 20864) GN=PAS_chr2-2_0041 PE=4 SV=1
Putative uncharacterized protein OS=Komagataella pastoris (strain GS115 / ATCC 20864) GN=PAS_chr3_1086 PE=4 SV=1
Protein component of the small (40S) ribosomal subunit OS=Komagataella pastoris (strain GS115 / ATCC 20864) GN=PAS_chr1-1_0283 PE=3 SV=1
Histone acetyltransferase catalytic subunit of the native multisubunit complex (NuA4) OS=Komagataella pastoris (strain GS115 / ATCC 20864) GN=PAS_chr4_0084 PE=4 SV=1
Transcription factor involved in glucose repression OS=Komagataella pastoris (strain GS115 / ATCC 20864) GN=PAS_chr4_0334 PE=4 SV=1
Translational elongation factor 3, stimulates the binding of aminoacyl-tRNA (AA-tRNA) to ribosomes OS=Komagataella pastoris (strain GS115 / ATCC 20864) GN=PAS_chr4_0038 PE=3 SV=1
Poly(A+) RNA-binding protein, involved in the export of mRNAs from the nucleus to the cytoplasm OS=Komagataella pastoris (strain GS115 / ATCC 20864) GN=PAS_chr1-1_0453 PE=4 SV=1
Putative nucleolar DEAD box RNA helicase OS=Komagataella pastoris (strain GS115 / ATCC 20864) GN=PAS_chr4_0231 PE=4 SV=1
Epsin-like protein involved in endocytosis and actin patch assembly OS=Komagataella pastoris (strain GS115 / ATCC 20864) GN=PAS_chr1-4_0244 PE=4 SV=1
Uncharacterized protein OS=Komagataella pastoris (strain GS115 / ATCC 20864) GN=PAS_chr4_0782 PE=4 SV=1
Putative uncharacterized protein OS=Komagataella pastoris (strain GS115 / ATCC 20864) GN=PAS_c131_0007 PE=4 SV=1
Putative uncharacterized protein OS=Komagataella pastoris (strain GS115 / ATCC 20864) GN=PAS_c034_0033 PE=4 SV=1
Putative uncharacterized protein OS=Komagataella pastoris (strain GS115 / ATCC 20864) GN=PAS_chr1-3_0203 PE=4 SV=1
Low-affinity phosphate transporter of the vacuolar membrane OS=Komagataella pastoris (strain GS115 / ATCC 20864) GN=PAS_chr3_0495 PE=4 SV=1
Subunit of a heterodimeric peroxisomal ATP-binding cassette transporter complex (Pxa1p-Pxa2p) OS=Komagataella pastoris (strain GS115 / ATCC 20864) GN=PAS_chr3_0822 PE=3 SV=1
Phosphatidylinositol-4-phosphate 5-kinase OS=Komagataella pastoris (strain GS115 / ATCC 20864) GN=PAS_chr1-1_0457 PE=4 SV=1
Uncharacterized protein OS=Komagataella pastoris (strain GS115 / ATCC 20864) GN=PAS_chr4_0930 PE=4 SV=1
Putative uncharacterized protein OS=Komagataella pastoris (strain GS115 / ATCC 20864) GN=PAS_chr1-4_0488 PE=4 SV=1
Subunit of the RES complex OS=Komagataella pastoris (strain GS115 / ATCC 20864) GN=PAS_chr3_0433 PE=4 SV=1
Putative uncharacterized protein OS=Komagataella pastoris (strain GS115 / ATCC 20864) GN=PAS_chr2-1_0646 PE=4 SV=1
Nuclear protein that binds to RNA and to Mex67p, required for export of poly(A)+ mRNA from the nucle OS=Komagataella pastoris (strain GS115 / ATCC 20864) GN=PAS_chr3_0097 PE=4 SV=1
RNA binding protein that negatively regulates growth rate OS=Komagataella pastoris (strain GS115 / ATCC 20864) GN=PAS_chr1-4_0223 PE=4 SV=1
Sorting nexin OS=Komagataella pastoris (strain GS115 / ATCC 20864) GN=PAS_chr3_0639 PE=4 SV=1
Putative uncharacterized protein OS=Komagataella pastoris (strain GS115 / ATCC 20864) GN=PAS_chr1-4_0415 PE=4 SV=1
RNA exonuclease, required for U4 snRNA maturation OS=Komagataella pastoris (strain GS115 / ATCC 20864) GN=PAS_chr3_0681 PE=4 SV=1
Nucleolar protein involved in pre-rRNA processing OS=Komagataella pastoris (strain GS115 / ATCC 20864) GN=PAS_chr3_0110 PE=4 SV=1
Rho GDP dissociation inhibitor involved in the localization and regulation of Cdc42p OS=Komagataella pastoris (strain GS115 / ATCC 20864) GN=PAS_chr1-1_0305 PE=4 SV=1
E3 ubiquitin ligase for Rad6p OS=Komagataella pastoris (strain GS115 / ATCC 20864) GN=PAS_chr4_0172 PE=4 SV=1
Nucleoside diphosphate kinase OS=Komagataella pastoris (strain GS115 / ATCC 20864) GN=PAS_chr2-2_0059 PE=3 SV=1
Predicted cytoskeleton protein OS=Komagataella pastoris (strain GS115 / ATCC 20864) GN=PAS_chr3_0518 PE=4 SV=1
Transcriptional coactivator HFI1/ADA1 OS=Komagataella pastoris (strain GS115 / ATCC 20864) GN=PAS_FragB_0044 PE=4 SV=1
TFIID subunit (150 kDa), involved in RNA polymerase II transcription initiation OS=Komagataella pastoris (strain GS115 / ATCC 20864) GN=PAS_chr2-2_0295 PE=4 SV=1
Putative uncharacterized protein OS=Komagataella pastoris (strain GS115 / ATCC 20864) GN=PAS_chr2-2_0296 PE=4 SV=1
Protein that interacts with mitotic cyclin Clb2p OS=Komagataella pastoris (strain GS115 / ATCC 20864) GN=PAS_chr2-2_0172 PE=3 SV=1
Dynamin-like GTPase required for vacuolar sorting OS=Komagataella pastoris (strain GS115 / ATCC 20864) GN=PAS_chr1-4_0644 PE=3 SV=1
Putative uncharacterized protein OS=Komagataella pastoris (strain GS115 / ATCC 20864) GN=PAS_chr3_0637 PE=4 SV=1
Essential protein involved in intracellular protein transport OS=Komagataella pastoris (strain GS115 / ATCC 20864) GN=PAS_chr4_0088 PE=4 SV=1
Uncharacterized protein OS=Komagataella pastoris (strain GS115 / ATCC 20864) GN=PAS_chr4_0390 PE=4 SV=1
Putative uncharacterized protein OS=Komagataella pastoris (strain GS115 / ATCC 20864) GN=PAS_chr2-1_0722 PE=4 SV=1
Uncharacterized protein OS=Komagataella pastoris (strain GS115 / ATCC 20864) GN=PAS_FragD_0019 PE=3 SV=1
Eukaryotic translation initiation factor 3 subunit A OS=Komagataella pastoris (strain GS115 / ATCC 20864) GN=TIF32 PE=3 SV=1
Subunit (61/68 kDa) of TFIID and SAGA complexes OS=Komagataella pastoris (strain GS115 / ATCC 20864) GN=PAS_chr2-1_0588 PE=4 SV=1
Putative cysteine protease similar to mammalian caspases OS=Komagataella pastoris (strain GS115 / ATCC 20864) GN=PAS_chr1-4_0430 PE=4 SV=1
Cytoskeletal protein binding protein required for assembly of the cortical actin cytoskeleton OS=Komagataella pastoris (strain GS115 / ATCC 20864) GN=PAS_chr2-1_0366 PE=4 SV=1
Uncharacterized protein OS=Komagataella pastoris (strain GS115 / ATCC 20864) GN=PAS_FragD_0007 PE=4 SV=1
Regulatory subunit of the Atg1p signaling complex OS=Komagataella pastoris (strain GS115 / ATCC 20864) GN=PAS_chr2-2_0432 PE=4 SV=1
Putative uncharacterized protein OS=Komagataella pastoris (strain GS115 / ATCC 20864) GN=PAS_chr2-2_0236 PE=4 SV=1
Component (70 kDa) of the TOM (Translocase of outer membrane) complex OS=Komagataella pastoris (strain GS115 / ATCC 20864) GN=PAS_chr2-2_0370 PE=4 SV=1
Putative uncharacterized protein OS=Komagataella pastoris (strain GS115 / ATCC 20864) GN=PAS_chr1-1_0104 PE=4 SV=1
Uncharacterized protein OS=Komagataella pastoris (strain GS115 / ATCC 20864) GN=PAS_chr4_0553 PE=4 SV=1
Essential protein possibly involved in secretion OS=Komagataella pastoris (strain GS115 / ATCC 20864) GN=PAS_chr3_0292 PE=4 SV=1
Transcriptional activator that enhances pseudohyphal growth OS=Komagataella pastoris (strain GS115 / ATCC 20864) GN=PAS_chr4_0326 PE=4 SV=1
Putative phosphopantothenoylcysteine synthetase (PPCS) OS=Komagataella pastoris (strain GS115 / ATCC 20864) GN=PAS_chr2-2_0204 PE=4 SV=1
Putative uncharacterized protein OS=Komagataella pastoris (strain GS115 / ATCC 20864) GN=PAS_chr3_1189 PE=4 SV=1
Protein proposed to be involved in the modification of N-linked oligosaccharides OS=Komagataella pastoris (strain GS115 / ATCC 20864) GN=PAS_chr2-2_0121 PE=4 SV=1
Putative uncharacterized protein OS=Komagataella pastoris (strain GS115 / ATCC 20864) GN=PAS_chr1-1_0148 PE=4 SV=1
Putative uncharacterized protein OS=Komagataella pastoris (strain GS115 / ATCC 20864) GN=PAS_c131_0010 PE=4 SV=1
Midasin OS=Komagataella pastoris (strain GS115 / ATCC 20864) GN=PAS_chr1-1_0187 PE=3 SV=1
Pseudouridine synthase catalytic subunit of box H/ACA small nucleolar ribonucleoprotein particles OS=Komagataella pastoris (strain GS115 / ATCC 20864) GN=PAS_chr2-2_0149 PE=4 SV=1
Putative uncharacterized protein OS=Komagataella pastoris (strain GS115 / ATCC 20864) GN=PAS_chr1-4_0312 PE=4 SV=1
Uncharacterized protein OS=Komagataella pastoris (strain GS115 / ATCC 20864) GN=PAS_chr4_0550 PE=4 SV=1
Beta regulatory subunit of casein kinase 2, a Ser/Thr protein kinase OS=Komagataella pastoris (strain GS115 / ATCC 20864) GN=PAS_chr4_0402 PE=4 SV=1
Cytosolic J-domain-containing protein OS=Komagataella pastoris (strain GS115 / ATCC 20864) GN=PAS_chr2-2_0085 PE=4 SV=1
Thioredoxin reductase OS=Komagataella pastoris (strain GS115 / ATCC 20864) GN=PAS_chr2-2_0480 PE=3 SV=1
Clathrin heavy chain, subunit of the major coat protein OS=Komagataella pastoris (strain GS115 / ATCC 20864) GN=PAS_chr1-4_0546 PE=4 SV=1
Voltage-gated high-affinity calcium channel OS=Komagataella pastoris (strain GS115 / ATCC 20864) GN=PAS_chr2-1_0301 PE=4 SV=1
Component of the Sin3p-Rpd3p histone deacetylase complex OS=Komagataella pastoris (strain GS115 / ATCC 20864) GN=PAS_chr3_0245 PE=4 SV=1
Nuclear polyadenylated RNA-binding protein OS=Komagataella pastoris (strain GS115 / ATCC 20864) GN=PAS_chr1-4_0590 PE=4 SV=1
Delta(24)-sterol C-methyltransferase OS=Komagataella pastoris (strain GS115 / ATCC 20864) GN=PAS_chr3_0371 PE=4 SV=1
Putative uncharacterized protein OS=Komagataella pastoris (strain GS115 / ATCC 20864) GN=PAS_chr2-2_0367 PE=4 SV=1
Cholinephosphate cytidylyltransferase, also known as CTP:phosphocholine cytidylyltransferase OS=Komagataella pastoris (strain GS115 / ATCC 20864) GN=PAS_chr2-2_0401 PE=4 SV=1
Delta(9) fatty acid desaturase OS=Komagataella pastoris (strain GS115 / ATCC 20864) GN=PAS_chr2-1_0072 PE=3 SV=1
Heat shock protein that cooperates with Ydj1p (Hsp40) and Ssa1p (Hsp70) OS=Komagataella pastoris (strain GS115 / ATCC 20864) GN=PAS_chr1-3_0102 PE=3 SV=1
Uncharacterized protein OS=Komagataella pastoris (strain GS115 / ATCC 20864) GN=PAS_chr4_0770 PE=4 SV=1
PEX19; peroxisomal biogenesis protein OS=Komagataella pastoris (strain GS115 / ATCC 20864) GN=PAS_chr2-1_0715 PE=4 SV=1
Uncharacterized protein OS=Komagataella pastoris (strain GS115 / ATCC 20864) GN=PAS_chr4_0379 PE=4 SV=1
Actin assembly factor, activates the Arp2/3 protein complex that nucleates branched actin filaments OS=Komagataella pastoris (strain GS115 / ATCC 20864) GN=PAS_chr1-4_0623 PE=4 SV=1
Transcriptional activator of genes regulated by nitrogen catabolite repression (NCR) OS=Komagataella pastoris (strain GS115 / ATCC 20864) GN=PAS_chr1-3_0126 PE=4 SV=1
Essential protein, constituent of 66S pre-ribosomal particles OS=Komagataella pastoris (strain GS115 / ATCC 20864) GN=PAS_chr2-1_0245 PE=4 SV=1
Putative uncharacterized protein OS=Komagataella pastoris (strain GS115 / ATCC 20864) GN=PAS_chr2-1_0231 PE=4 SV=1
Protein component of the small (40S) ribosomal subunit OS=Komagataella pastoris (strain GS115 / ATCC 20864) GN=PAS_chr4_0414 PE=3 SV=1
ADP-ribosylation factor (ARF) GTPase activating protein (GAP) effector OS=Komagataella pastoris (strain GS115 / ATCC 20864) GN=PAS_chr1-4_0340 PE=4 SV=1
Uncharacterized protein OS=Komagataella pastoris (strain GS115 / ATCC 20864) GN=PAS_chr4_0372 PE=4 SV=1
Guanine nucleotide exchange factor OS=Komagataella pastoris (strain GS115 / ATCC 20864) GN=PAS_chr3_0203 PE=4 SV=1
ADP-ribosylation factor GTPase activating protein (ARF GAP), involved in ER-Golgi transport OS=Komagataella pastoris (strain GS115 / ATCC 20864) GN=PAS_chr3_0974 PE=4 SV=1
Protein kinase, phosphorylates the alpha-subunit of translation initiation factor eIF2 (Sui2p) OS=Komagataella pastoris (strain GS115 / ATCC 20864) GN=PAS_chr3_0850 PE=4 SV=1
Putative uncharacterized protein OS=Komagataella pastoris (strain GS115 / ATCC 20864) GN=PAS_chr1-1_0425 PE=4 SV=1
ADP-ribosylation factor GTPase activating protein (ARF GAP) OS=Komagataella pastoris (strain GS115 / ATCC 20864) GN=PAS_chr3_0559 PE=4 SV=1
Putative uncharacterized protein OS=Komagataella pastoris (strain GS115 / ATCC 20864) GN=PAS_chr1-3_0296 PE=4 SV=1
Essential subunit of the Pan2p-Pan3p poly(A)-ribonuclease complex OS=Komagataella pastoris (strain GS115 / ATCC 20864) GN=PAS_chr2-1_0541 PE=4 SV=1
Catalytic subunit of the Dcp1p-Dcp2p decapping enzyme complex OS=Komagataella pastoris (strain GS115 / ATCC 20864) GN=PAS_chr4_0194 PE=4 SV=1
General negative regulator of transcription subunit 4 OS=Komagataella pastoris (strain GS115 / ATCC 20864) GN=PAS_chr1-4_0594 PE=4 SV=1
Ubiquitin-protein ligase (E3) that interacts with Rpt4p and Rpt6p OS=Komagataella pastoris (strain GS115 / ATCC 20864) GN=PAS_chr1-1_0363 PE=4 SV=1
Constituent of 66S pre-ribosomal particles, involved in 60S ribosomal subunit biogenesis OS=Komagataella pastoris (strain GS115 / ATCC 20864) GN=PAS_chr2-1_0234 PE=4 SV=1
Sensor-transducer of the stress-activated PKC1-MPK1 kinase pathway OS=Komagataella pastoris (strain GS115 / ATCC 20864) GN=PAS_chr3_0673 PE=4 SV=1
Putative uncharacterized protein OS=Komagataella pastoris (strain GS115 / ATCC 20864) GN=PAS_chr1-3_0233 PE=4 SV=1
Protein that binds to cruciform DNA structures OS=Komagataella pastoris (strain GS115 / ATCC 20864) GN=PAS_chr3_0627 PE=4 SV=1
Conserved 90S pre-ribosomal component essential for proper endonucleolytic cleavage of the 35 S rRNA OS=Komagataella pastoris (strain GS115 / ATCC 20864) GN=PAS_chr2-1_0267 PE=4 SV=1
ER membrane protein OS=Komagataella pastoris (strain GS115 / ATCC 20864) GN=PAS_chr3_0626 PE=4 SV=1
Essential nucleolar protein required for 40S ribosome biogenesis OS=Komagataella pastoris (strain GS115 / ATCC 20864) GN=PAS_chr1-4_0098 PE=4 SV=1
Beta3-like subunit of the yeast AP-3 complex OS=Komagataella pastoris (strain GS115 / ATCC 20864) GN=PAS_chr2-2_0415 PE=4 SV=1
Subunit of the HIR complex, a nucleosome assembly complex involved in histone gene transcription OS=Komagataella pastoris (strain GS115 / ATCC 20864) GN=PAS_chr2-2_0246 PE=4 SV=1
Uncharacterized protein OS=Komagataella pastoris (strain GS115 / ATCC 20864) GN=PAS_chr4_0656 PE=4 SV=1
Catalase OS=Komagataella pastoris (strain GS115 / ATCC 20864) GN=PAS_chr2-2_0131 PE=3 SV=1
Putative uncharacterized protein OS=Komagataella pastoris (strain GS115 / ATCC 20864) GN=PAS_chr2-1_0807 PE=4 SV=1
Sulfite reductase beta subunit, involved in amino acid biosynthesis, transcription repressed by meth OS=Komagataella pastoris (strain GS115 / ATCC 20864) GN=PAS_chr3_1084 PE=4 SV=1
Essential protein involved in rRNA and snoRNA maturation OS=Komagataella pastoris (strain GS115 / ATCC 20864) GN=PAS_chr1-3_0228 PE=4 SV=1
One of three possible beta-subunits of the Snf1 kinase complex OS=Komagataella pastoris (strain GS115 / ATCC 20864) GN=PAS_chr1-4_0498 PE=4 SV=1
Putative uncharacterized protein OS=Komagataella pastoris (strain GS115 / ATCC 20864) GN=PAS_chr1-1_0422 PE=4 SV=1
Adenosylhomocysteinase OS=Komagataella pastoris (strain GS115 / ATCC 20864) GN=PAS_chr3_0890 PE=3 SV=1
Component of mRNP complexes associated with polyribosomes OS=Komagataella pastoris (strain GS115 / ATCC 20864) GN=PAS_chr1-4_0428 PE=4 SV=1
Putative uncharacterized protein OS=Komagataella pastoris (strain GS115 / ATCC 20864) GN=PAS_chr1-3_0111 PE=4 SV=1
Putative uncharacterized protein OS=Komagataella pastoris (strain GS115 / ATCC 20864) GN=PAS_chr1-3_0180 PE=4 SV=1
Bifunctional carbamoylphosphate synthetase (CPSase)-aspartate transcarbamylase (ATCase) OS=Komagataella pastoris (strain GS115 / ATCC 20864) GN=PAS_chr2-2_0142 PE=3 SV=1
Putative uncharacterized protein OS=Komagataella pastoris (strain GS115 / ATCC 20864) GN=PAS_chr2-2_0352 PE=4 SV=1
Lanosterol 14-alpha-demethylase, catalyzes the C-14 demethylation of lanosterol OS=Komagataella pastoris (strain GS115 / ATCC 20864) GN=PAS_chr3_0957 PE=3 SV=1
ATPase in ER, nuclear membrane and cytosol with homology to mammalian p97 OS=Komagataella pastoris (strain GS115 / ATCC 20864) GN=PAS_FragD_0026 PE=4 SV=1
Putative uncharacterized protein OS=Komagataella pastoris (strain GS115 / ATCC 20864) GN=PAS_chr2-2_0156 PE=4 SV=1
Putative uncharacterized protein OS=Komagataella pastoris (strain GS115 / ATCC 20864) GN=PAS_chr3_0948 PE=4 SV=1
Cytoplasmic ATP-dependent RNA helicase of the DEAD-box family OS=Komagataella pastoris (strain GS115 / ATCC 20864) GN=PAS_chr1-3_0074 PE=4 SV=1
Hsp70 protein that interacts with Zuo1p (A DnaJ homolog) to form a ribosome-associated complex OS=Komagataella pastoris (strain GS115 / ATCC 20864) GN=PAS_chr1-1_0036 PE=3 SV=1
Phosphatidylethanolamine N-methyltransferase OS=Komagataella pastoris (strain GS115 / ATCC 20864) GN=CHO2 PE=3 SV=1
Putative uncharacterized protein OS=Komagataella pastoris (strain GS115 / ATCC 20864) GN=PAS_chr3_0395 PE=4 SV=1
Putative uncharacterized protein OS=Komagataella pastoris (strain GS115 / ATCC 20864) GN=PAS_chr1-3_0173 PE=4 SV=1
Protein component of the large (60S) ribosomal subunit, identical to Rpl35Ap OS=Komagataella pastoris (strain GS115 / ATCC 20864) GN=PAS_chr1-1_0302 PE=3 SV=1
Uncharacterized protein OS=Komagataella pastoris (strain GS115 / ATCC 20864) GN=PAS_chr4_0628 PE=4 SV=1
Protein involved in 20S proteasome assembly OS=Komagataella pastoris (strain GS115 / ATCC 20864) GN=PAS_chr2-1_0552 PE=4 SV=1
Catalytic subunit of the COP9 signalosome (CSN) complex OS=Komagataella pastoris (strain GS115 / ATCC 20864) GN=PAS_chr1-3_0105 PE=4 SV=1
Uncharacterized protein OS=Komagataella pastoris (strain GS115 / ATCC 20864) GN=PAS_chr4_0551 PE=4 SV=1
Putative uncharacterized protein OS=Komagataella pastoris (strain GS115 / ATCC 20864) GN=PAS_chr2-1_0874 PE=4 SV=1
Protein involved in mating response, invasive/filamentous growth, and osmotolerance OS=Komagataella pastoris (strain GS115 / ATCC 20864) GN=PAS_chr1-1_0348 PE=4 SV=1
TFIIF (Transcription Factor II) largest subunit OS=Komagataella pastoris (strain GS115 / ATCC 20864) GN=PAS_chr4_0518 PE=4 SV=1
Putative uncharacterized protein OS=Komagataella pastoris (strain GS115 / ATCC 20864) GN=PAS_chr1-4_0666 PE=4 SV=1
RNA polymerase subunit ABC14.5, common to RNA polymerases I, II, and III OS=Komagataella pastoris (strain GS115 / ATCC 20864) GN=PAS_chr2-2_0309 PE=4 SV=1
Putative uncharacterized protein OS=Komagataella pastoris (strain GS115 / ATCC 20864) GN=PAS_chr2-1_0737 PE=4 SV=1
Uncharacterized protein OS=Komagataella pastoris (strain GS115 / ATCC 20864) GN=PAS_chr4_0089 PE=4 SV=1
Protein component of the large (60S) ribosomal subunit OS=Komagataella pastoris (strain GS115 / ATCC 20864) GN=PAS_chr4_0139 PE=3 SV=1
Ubiquitin carboxyl-terminal hydrolase OS=Komagataella pastoris (strain GS115 / ATCC 20864) GN=PAS_chr1-1_0040 PE=3 SV=1
Protein component of the small (40S) ribosomal subunit OS=Komagataella pastoris (strain GS115 / ATCC 20864) GN=PAS_chr1-4_0353 PE=4 SV=1
Protein involved in cell morphogenesis and proliferation, associated with protein kinase Cbk1p OS=Komagataella pastoris (strain GS115 / ATCC 20864) GN=PAS_chr4_0119 PE=4 SV=1
Putative uncharacterized protein OS=Komagataella pastoris (strain GS115 / ATCC 20864) GN=PAS_chr2-1_0808 PE=4 SV=1
Putative uncharacterized protein OS=Komagataella pastoris (strain GS115 / ATCC 20864) GN=PAS_c131_0011 PE=4 SV=1
TFIID subunit (48 kDa) OS=Komagataella pastoris (strain GS115 / ATCC 20864) GN=PAS_chr3_0267 PE=4 SV=1
High affinity methionine permease OS=Komagataella pastoris (strain GS115 / ATCC 20864) GN=PAS_chr2-1_0351 PE=4 SV=1
E3 ubiquitin ligase of the hect-domain class OS=Komagataella pastoris (strain GS115 / ATCC 20864) GN=PAS_chr3_0044 PE=4 SV=1
Putative uncharacterized protein OS=Komagataella pastoris (strain GS115 / ATCC 20864) GN=PAS_chr1-4_0100 PE=4 SV=1
Catalytic subunit of TRAMP (Trf4/Pap2p-Mtr4p-Air1p/2p) OS=Komagataella pastoris (strain GS115 / ATCC 20864) GN=PAS_chr4_0229 PE=4 SV=1
Phosphoinositide PI4,5P(2) binding protein, forms a complex with Slm2p OS=Komagataella pastoris (strain GS115 / ATCC 20864) GN=PAS_chr1-4_0418 PE=4 SV=1
Putative uncharacterized protein OS=Komagataella pastoris (strain GS115 / ATCC 20864) GN=PAS_chr2-1_0682 PE=4 SV=1
Putative uncharacterized protein OS=Komagataella pastoris (strain GS115 / ATCC 20864) GN=PAS_chr2-1_0693 PE=4 SV=1
Phosphoglucomutase OS=Komagataella pastoris (strain GS115 / ATCC 20864) GN=PAS_chr1-4_0264 PE=3 SV=1
Transcription factor involved in regulation of cell cycle progression from G1 to S phase OS=Komagataella pastoris (strain GS115 / ATCC 20864) GN=PAS_chr2-1_0508 PE=4 SV=1
GTP/GDP exchange factor for Rsr1p (Bud1p) required for both axial and bipolar budding patterns OS=Komagataella pastoris (strain GS115 / ATCC 20864) GN=PAS_chr3_0660 PE=4 SV=1
Glucose-6-phosphate 1-dehydrogenase OS=Komagataella pastoris (strain GS115 / ATCC 20864) GN=PAS_chr2-1_0308 PE=3 SV=1
Essential serine kinase involved in cell cycle progression and processing of the 20S pre-rRNA into m OS=Komagataella pastoris (strain GS115 / ATCC 20864) GN=PAS_chr3_0112 PE=4 SV=1
Protein component of the large (60S) ribosomal subunit OS=Komagataella pastoris (strain GS115 / ATCC 20864) GN=PAS_chr4_0041 PE=4 SV=1
Plasma membrane ATP-binding cassette (ABC) transporter OS=Komagataella pastoris (strain GS115 / ATCC 20864) GN=PAS_chr4_0832 PE=3 SV=1
Protein component of the large (60S) ribosomal subunit OS=Komagataella pastoris (strain GS115 / ATCC 20864) GN=PAS_chr4_0131 PE=4 SV=1
Transcriptional modulator OS=Komagataella pastoris (strain GS115 / ATCC 20864) GN=PAS_chr1-4_0492 PE=4 SV=1
Acetylated, cis-golgi localized protein involved in ER to Golgi transport OS=Komagataella pastoris (strain GS115 / ATCC 20864) GN=PAS_chr4_0868 PE=4 SV=1
Glycogen synthase, similar to Gsy1p OS=Komagataella pastoris (strain GS115 / ATCC 20864) GN=PAS_chr3_0781 PE=4 SV=1
One of two type I myosins OS=Komagataella pastoris (strain GS115 / ATCC 20864) GN=PAS_chr4_0618 PE=4 SV=1
Putative uncharacterized protein OS=Komagataella pastoris (strain GS115 / ATCC 20864) GN=PAS_chr3_0607 PE=4 SV=1
Putative uncharacterized protein OS=Komagataella pastoris (strain GS115 / ATCC 20864) GN=PAS_chr2-2_0468 PE=4 SV=1
L-homoserine-O-acetyltransferase, catalyzes the conversion of homoserine to O-acetyl homoserine OS=Komagataella pastoris (strain GS115 / ATCC 20864) GN=PAS_chr4_0865 PE=4 SV=1
Multidrug transporter of the major facilitator superfamily OS=Komagataella pastoris (strain GS115 / ATCC 20864) GN=PAS_chr1-4_0078 PE=4 SV=1
Histone methyltransferase OS=Komagataella pastoris (strain GS115 / ATCC 20864) GN=PAS_chr1-4_0287 PE=4 SV=1
L-ornithine transaminase (OTAse) OS=Komagataella pastoris (strain GS115 / ATCC 20864) GN=PAS_chr3_0410 PE=3 SV=1
Mitogen-activated kinase kinase involved in protein kinase C signaling pathway OS=Komagataella pastoris (strain GS115 / ATCC 20864) GN=PAS_chr1-4_0271 PE=4 SV=1
Polyphosphatidylinositol phosphatase, dephosphorylates multiple phosphatidylinositols OS=Komagataella pastoris (strain GS115 / ATCC 20864) GN=PAS_chr2-1_0178 PE=4 SV=1
Cytoplasmic protein required for replication of Brome mosaic virus in S. cerevisiae OS=Komagataella pastoris (strain GS115 / ATCC 20864) GN=PAS_chr3_0682 PE=4 SV=1
Protein with DNA-dependent ATPase and ssDNA annealing activities involved in maintenance of genome OS=Komagataella pastoris (strain GS115 / ATCC 20864) GN=PAS_chr2-2_0287 PE=4 SV=1
Putative uncharacterized protein OS=Komagataella pastoris (strain GS115 / ATCC 20864) GN=PAS_chr1-1_0204 PE=4 SV=1
MAP kinase kinase that plays a pivotal role in the osmosensing signal-transduction pathway OS=Komagataella pastoris (strain GS115 / ATCC 20864) GN=PAS_chr1-1_0105 PE=4 SV=1
Rho GTPase activating protein (RhoGAP) involved in control of the cytoskeleton organization OS=Komagataella pastoris (strain GS115 / ATCC 20864) GN=PAS_chr1-4_0424 PE=4 SV=1
Uncharacterized protein OS=Komagataella pastoris (strain GS115 / ATCC 20864) GN=PAS_chr4_0986 PE=3 SV=1
DNA-directed RNA polymerase subunit OS=Komagataella pastoris (strain GS115 / ATCC 20864) GN=PAS_chr2-1_0554 PE=3 SV=1
Histone acetyltransferase catalytic subunit of NuA3 complex that acetylates histone H3, involved in OS=Komagataella pastoris (strain GS115 / ATCC 20864) GN=PAS_chr2-2_0213 PE=4 SV=1
Poly(A) binding protein, part of the 3~-end RNA-processing complex OS=Komagataella pastoris (strain GS115 / ATCC 20864) GN=PAS_chr1-4_0283 PE=4 SV=1
Elongation factor Tu OS=Komagataella pastoris (strain GS115 / ATCC 20864) GN=PAS_chr3_0562 PE=3 SV=1
Dynamin-related GTPase OS=Komagataella pastoris (strain GS115 / ATCC 20864) GN=PAS_chr3_0751 PE=3 SV=1
Clathrin light chain OS=Komagataella pastoris (strain GS115 / ATCC 20864) GN=PAS_chr1-4_0158 PE=4 SV=1
Putative uncharacterized protein OS=Komagataella pastoris (strain GS115 / ATCC 20864) GN=PAS_chr3_1017 PE=4 SV=1
GTPase activating factor for Rsr1p/Bud1p required for both axial and bipolar budding patterns OS=Komagataella pastoris (strain GS115 / ATCC 20864) GN=PAS_chr3_0656 PE=4 SV=1
Transporter of thiamine or related compound OS=Komagataella pastoris (strain GS115 / ATCC 20864) GN=PAS_chr3_0649 PE=4 SV=1
Ubiquitin-specific protease that deubiquitinates ubiquitin-protein moieties OS=Komagataella pastoris (strain GS115 / ATCC 20864) GN=PAS_chr1-3_0108 PE=4 SV=1
Putative uncharacterized protein OS=Komagataella pastoris (strain GS115 / ATCC 20864) GN=PAS_chr2-2_0177 PE=4 SV=1
Uncharacterized protein OS=Komagataella pastoris (strain GS115 / ATCC 20864) GN=PAS_chr4_0935 PE=4 SV=1
Putative uncharacterized protein OS=Komagataella pastoris (strain GS115 / ATCC 20864) GN=PAS_chr3_0132 PE=4 SV=1
Endosomal protein that regulates cell polarity, controls polarized growth OS=Komagataella pastoris (strain GS115 / ATCC 20864) GN=PAS_chr4_0430 PE=4 SV=1
Putative uncharacterized protein OS=Komagataella pastoris (strain GS115 / ATCC 20864) GN=PAS_chr2-1_0726 PE=4 SV=1
Small subunit of the ribonucleotide-diphosphate reductase (RNR) complex OS=Komagataella pastoris (strain GS115 / ATCC 20864) GN=PAS_chr4_0197 PE=4 SV=1
Protein involved in transcription initiation at TATA-containing promoters OS=Komagataella pastoris (strain GS115 / ATCC 20864) GN=PAS_chr1-4_0220 PE=4 SV=1
Peptidyl-prolyl isomerase OS=Komagataella pastoris (strain GS115 / ATCC 20864) GN=PAS_c034_0039 PE=3 SV=1
Putative uncharacterized protein OS=Komagataella pastoris (strain GS115 / ATCC 20864) GN=PAS_chr2-2_0442 PE=4 SV=1
Protein involved in bud-site selection OS=Komagataella pastoris (strain GS115 / ATCC 20864) GN=PAS_chr1-4_0193 PE=4 SV=1
Putative uncharacterized protein OS=Komagataella pastoris (strain GS115 / ATCC 20864) GN=PAS_c121_0004 PE=4 SV=1
Transcription factor (BHLH) involved in interorganelle communication OS=Komagataella pastoris (strain GS115 / ATCC 20864) GN=PAS_chr1-1_0371 PE=4 SV=1
Component of the Rsp5p E3-ubiquitin ligase complex OS=Komagataella pastoris (strain GS115 / ATCC 20864) GN=PAS_chr2-2_0023 PE=4 SV=1
Homocitrate synthase isozyme, catalyzes the condensation of acetyl-CoA and alpha-ketoglutarate OS=Komagataella pastoris (strain GS115 / ATCC 20864) GN=PAS_chr1-4_0421 PE=3 SV=1
Regulatory subunit of type 1 protein phosphatase Glc7p OS=Komagataella pastoris (strain GS115 / ATCC 20864) GN=PAS_chr1-1_0078 PE=4 SV=1
Dicarboxylic amino acid permease OS=Komagataella pastoris (strain GS115 / ATCC 20864) GN=PAS_chr4_0287 PE=4 SV=1
Putative uncharacterized protein OS=Komagataella pastoris (strain GS115 / ATCC 20864) GN=PAS_chr2-1_0008 PE=4 SV=1
Protein involved in G1 cell cycle arrest in response to pheromon OS=Komagataella pastoris (strain GS115 / ATCC 20864) GN=PAS_chr2-2_0353 PE=4 SV=1
Acetyl-coA synthetase isoform OS=Komagataella pastoris (strain GS115 / ATCC 20864) GN=PAS_chr2-1_0767 PE=4 SV=1
Negative regulator of RNA polymerase III OS=Komagataella pastoris (strain GS115 / ATCC 20864) GN=PAS_chr1-3_0026 PE=4 SV=1
Ribonucleoside-diphosphate reductase OS=Komagataella pastoris (strain GS115 / ATCC 20864) GN=PAS_chr1-1_0282 PE=3 SV=1
ATP-dependent RNA helicase OS=Komagataella pastoris (strain GS115 / ATCC 20864) GN=PAS_chr1-1_0061 PE=4 SV=1
Protein involved in clathrin cage assembly OS=Komagataella pastoris (strain GS115 / ATCC 20864) GN=PAS_chr2-2_0405 PE=4 SV=1
Putative uncharacterized protein OS=Komagataella pastoris (strain GS115 / ATCC 20864) GN=PAS_chr3_0514 PE=4 SV=1
Putative uncharacterized protein OS=Komagataella pastoris (strain GS115 / ATCC 20864) GN=PAS_chr1-1_0133 PE=4 SV=1
PIK-related protein kinase and rapamycin target OS=Komagataella pastoris (strain GS115 / ATCC 20864) GN=PAS_chr2-1_0557 PE=4 SV=1
Putative uncharacterized protein OS=Komagataella pastoris (strain GS115 / ATCC 20864) GN=PAS_chr3_0239 PE=4 SV=1
Saccharopine dehydrogenase [NAD(+), L-lysine-forming] OS=Komagataella pastoris (strain GS115 / ATCC 20864) GN=PAS_chr1-1_0447 PE=3 SV=1
Putative uncharacterized protein OS=Komagataella pastoris (strain GS115 / ATCC 20864) GN=PAS_chr1-1_0351 PE=4 SV=1
Peroxisomal membrane peroxin that is a central component of the peroxisomal protein import machinery OS=Komagataella pastoris (strain GS115 / ATCC 20864) GN=PAS_chr4_0794 PE=4 SV=1
Cytoplasmic tyrosyl-tRNA synthetase, class I aminoacyl-tRNA synthetase OS=Komagataella pastoris (strain GS115 / ATCC 20864) GN=PAS_chr4_0522 PE=4 SV=1
Plasma membrane protein that may be involved in osmotolerance OS=Komagataella pastoris (strain GS115 / ATCC 20864) GN=PAS_chr2-1_0501 PE=4 SV=1
Ubiquitin-conjugating enzyme that mediates selective degradation of short-lived and abnormal protein OS=Komagataella pastoris (strain GS115 / ATCC 20864) GN=PAS_chr4_0429 PE=3 SV=1
Synaptobrevin homolog 2 OS=Komagataella pastoris (strain GS115 / ATCC 20864) GN=PAS_FragB_0011 PE=4 SV=1
Putative uncharacterized protein OS=Komagataella pastoris (strain GS115 / ATCC 20864) GN=PAS_chr2-2_0268 PE=4 SV=1
Nucleolar protein OS=Komagataella pastoris (strain GS115 / ATCC 20864) GN=PAS_chr3_0212 PE=4 SV=1
Chorismate mutase, catalyzes the conversion of chorismate to prephenate OS=Komagataella pastoris (strain GS115 / ATCC 20864) GN=PAS_chr4_0050 PE=4 SV=1
Putative transcription factor OS=Komagataella pastoris (strain GS115 / ATCC 20864) GN=PAS_chr1-4_0516 PE=4 SV=1
Defining member of the SET3 histone deacetylase complex OS=Komagataella pastoris (strain GS115 / ATCC 20864) GN=PAS_chr1-3_0037 PE=4 SV=1
Putative uncharacterized protein OS=Komagataella pastoris (strain GS115 / ATCC 20864) GN=PAS_chr3_1235 PE=4 SV=1
Putative uncharacterized protein OS=Komagataella pastoris (strain GS115 / ATCC 20864) GN=PAS_chr3_1258 PE=4 SV=1
Serine/threonine MAP kinase OS=Komagataella pastoris (strain GS115 / ATCC 20864) GN=PAS_chr3_0895 PE=4 SV=1
Protein involved in negative regulation of transcription of iron regulon OS=Komagataella pastoris (strain GS115 / ATCC 20864) GN=PAS_chr1-1_0111 PE=3 SV=1
Subunit of a replication-pausing checkpoint complex (Tof1p-Mrc1p-Csm3p) OS=Komagataella pastoris (strain GS115 / ATCC 20864) GN=PAS_chr2-2_0013 PE=4 SV=1
Uncharacterized protein OS=Komagataella pastoris (strain GS115 / ATCC 20864) GN=PAS_chr4_0678 PE=4 SV=1
Alpha subunit of the heteromeric nascent polypeptide-associated complex (NAC) OS=Komagataella pastoris (strain GS115 / ATCC 20864) GN=PAS_chr2-1_0755 PE=4 SV=1
Adenylyl cyclase-associated protein OS=Komagataella pastoris (strain GS115 / ATCC 20864) GN=PAS_chr2-2_0067 PE=3 SV=1
Putative uncharacterized protein OS=Komagataella pastoris (strain GS115 / ATCC 20864) GN=PAS_chr1-4_0321 PE=4 SV=1
Nicotinic acid mononucleotide adenylyltransferase, involved in pathways of NAD biosynthesis OS=Komagataella pastoris (strain GS115 / ATCC 20864) GN=PAS_chr1-4_0181 PE=4 SV=1
Plasma membrane ATP binding cassette (ABC) transporter OS=Komagataella pastoris (strain GS115 / ATCC 20864) GN=PAS_chr2-2_0299 PE=4 SV=1
Uncharacterized protein OS=Komagataella pastoris (strain GS115 / ATCC 20864) GN=PAS_chr4_0699 PE=4 SV=1
Fructose 1,6-bisphosphate aldolase, required for glycolysis and gluconeogenesis OS=Komagataella pastoris (strain GS115 / ATCC 20864) GN=PAS_chr1-1_0072 PE=4 SV=1
Essential ATP-dependent RNA helicase of the DEAD-box protein family OS=Komagataella pastoris (strain GS115 / ATCC 20864) GN=PAS_chr4_0201 PE=4 SV=1
Putative uncharacterized protein OS=Komagataella pastoris (strain GS115 / ATCC 20864) GN=PAS_chr3_0416 PE=4 SV=1
Putative uncharacterized protein OS=Komagataella pastoris (strain GS115 / ATCC 20864) GN=PAS_chr2-1_0742 PE=4 SV=1
Protein chaperone involved in regulation of the HSP90 and HSP70 functions OS=Komagataella pastoris (strain GS115 / ATCC 20864) GN=PAS_chr2-2_0066 PE=3 SV=1
GTPase that associates with nuclear 60S pre-ribosomes, required for export of 60S ribosomal subunits OS=Komagataella pastoris (strain GS115 / ATCC 20864) GN=PAS_chr1-1_0058 PE=4 SV=1
Pyridoxine (Pyridoxamine) phosphate oxidase, has homologs in E. coli and Myxococcus xanthus OS=Komagataella pastoris (strain GS115 / ATCC 20864) GN=PAS_chr1-1_0448 PE=3 SV=1
ATPase component of the RSC chromatin remodeling complex OS=Komagataella pastoris (strain GS115 / ATCC 20864) GN=PAS_chr2-2_0128 PE=4 SV=1
Catalytic epsilon subunit of the translation initiation factor eIF2B OS=Komagataella pastoris (strain GS115 / ATCC 20864) GN=PAS_chr3_0391 PE=4 SV=1
Xylulokinase, converts D-xylulose and ATP to xylulose 5-phosphate and ADP OS=Komagataella pastoris (strain GS115 / ATCC 20864) GN=PAS_chr1-1_0280 PE=4 SV=1
Divalent metal ion transporter involved in manganese homeostasis OS=Komagataella pastoris (strain GS115 / ATCC 20864) GN=PAS_chr1-4_0246 PE=3 SV=1
Putative uncharacterized protein OS=Komagataella pastoris (strain GS115 / ATCC 20864) GN=PAS_chr1-4_0700 PE=4 SV=1
Mitogen-activated protein (MAP) kinase kinase kinase OS=Komagataella pastoris (strain GS115 / ATCC 20864) GN=PAS_chr3_0220 PE=4 SV=1
Alpha 2 subunit of the 20S proteasome OS=Komagataella pastoris (strain GS115 / ATCC 20864) GN=PAS_chr2-1_0188 PE=4 SV=1
Protein kinase implicated in activation of the plasma membrane H(+)-ATPase Pma1p OS=Komagataella pastoris (strain GS115 / ATCC 20864) GN=PAS_chr3_1091 PE=4 SV=1
Vacuolar transporter OS=Komagataella pastoris (strain GS115 / ATCC 20864) GN=PAS_chr3_0226 PE=4 SV=1
Phosphoribosyl-5-amino-1-phosphoribosyl-4-imidazolecarboxiamide isomerase OS=Komagataella pastoris (strain GS115 / ATCC 20864) GN=PAS_chr4_0343 PE=3 SV=1
Phosphatidylinositol transfer protein OS=Komagataella pastoris (strain GS115 / ATCC 20864) GN=PAS_chr1-4_0532 PE=4 SV=1
Uncharacterized protein OS=Komagataella pastoris (strain GS115 / ATCC 20864) GN=PAS_chr4_0655 PE=4 SV=1
Acetyl-CoA carboxylase, biotin containing enzyme OS=Komagataella pastoris (strain GS115 / ATCC 20864) GN=PAS_chr1-4_0249 PE=4 SV=1
6-phosphofructo-2-kinase, inhibited by phosphoenolpyruvate and sn-glycerol 3-phosphate, has negligib OS=Komagataella pastoris (strain GS115 / ATCC 20864) GN=PAS_chr2-2_0060 PE=4 SV=1
Member of an oxysterol-binding protein family with seven members in S. cerevisiae OS=Komagataella pastoris (strain GS115 / ATCC 20864) GN=PAS_chr3_0421 PE=4 SV=1
Essential abundant protein involved in regulation of transcription OS=Komagataella pastoris (strain GS115 / ATCC 20864) GN=PAS_chr2-2_0061 PE=4 SV=1
Nuclear pore complex subunit, part of a subcomplex also containing Nup53p, Nup170p, and Pse1p OS=Komagataella pastoris (strain GS115 / ATCC 20864) GN=PAS_chr4_0657 PE=4 SV=1
Cytochrome b-c1 complex subunit 7 OS=Komagataella pastoris (strain GS115 / ATCC 20864) GN=PAS_chr1-1_0322 PE=3 SV=1
Protein with a potential role in actin cytoskeletal organization OS=Komagataella pastoris (strain GS115 / ATCC 20864) GN=PAS_chr3_0865 PE=4 SV=1
Polyamine transport protein specific for spermine OS=Komagataella pastoris (strain GS115 / ATCC 20864) GN=PAS_chr1-4_0090 PE=4 SV=1
Trimethyl guanosine synthase, conserved nucleolar methyl transferase OS=Komagataella pastoris (strain GS115 / ATCC 20864) GN=PAS_chr4_0090 PE=4 SV=1
Putative uncharacterized protein OS=Komagataella pastoris (strain GS115 / ATCC 20864) GN=PAS_chr1-4_0288 PE=4 SV=1
Serine/threonine-protein phosphatase OS=Komagataella pastoris (strain GS115 / ATCC 20864) GN=PAS_chr2-1_0407 PE=3 SV=1
Putative uncharacterized protein OS=Komagataella pastoris (strain GS115 / ATCC 20864) GN=PAS_chr3_1226 PE=4 SV=1
Metalloprotease subunit of the 19S regulatory particle of the 26S proteasome lid OS=Komagataella pastoris (strain GS115 / ATCC 20864) GN=PAS_chr2-2_0341 PE=4 SV=1
Vacuolar protein sorting-associated protein 27 OS=Komagataella pastoris (strain GS115 / ATCC 20864) GN=PAS_FragB_0049 PE=4 SV=1
Putative uncharacterized protein OS=Komagataella pastoris (strain GS115 / ATCC 20864) GN=PAS_chr3_0411 PE=4 SV=1
Guanine nucleotide exchange factor (GEF) OS=Komagataella pastoris (strain GS115 / ATCC 20864) GN=PAS_chr2-1_0586 PE=4 SV=1
Component of the RSC chromatin remodeling complex OS=Komagataella pastoris (strain GS115 / ATCC 20864) GN=PAS_chr3_0544 PE=4 SV=1
Putative uncharacterized protein OS=Komagataella pastoris (strain GS115 / ATCC 20864) GN=PAS_chr1-3_0234 PE=4 SV=1
Cystathionine beta-synthase, catalyzes the synthesis of cystathionine from serine and homocysteine OS=Komagataella pastoris (strain GS115 / ATCC 20864) GN=PAS_chr2-2_0137 PE=4 SV=1
Component of the septin ring of the mother-bud neck that is required for cytokinesis OS=Komagataella pastoris (strain GS115 / ATCC 20864) GN=PAS_chr3_0967 PE=3 SV=1
Nucleosome remodeling factor that functions in regulation of transcription elongation OS=Komagataella pastoris (strain GS115 / ATCC 20864) GN=PAS_chr2-1_0095 PE=4 SV=1
Deletion suppressor of mpt5 mutation OS=Komagataella pastoris (strain GS115 / ATCC 20864) GN=PAS_chr2-1_0491 PE=4 SV=1
Putative uncharacterized protein OS=Komagataella pastoris (strain GS115 / ATCC 20864) GN=PAS_chr1-4_0138 PE=4 SV=1
Subunit of the NuA4 histone acetyltransferase complex that acetylates histone H4 and H2A OS=Komagataella pastoris (strain GS115 / ATCC 20864) GN=PAS_chr2-1_0321 PE=4 SV=1
Putative uncharacterized protein OS=Komagataella pastoris (strain GS115 / ATCC 20864) GN=PAS_chr2-1_0253 PE=4 SV=1
Putative uncharacterized protein OS=Komagataella pastoris (strain GS115 / ATCC 20864) GN=PAS_chr3_0501 PE=4 SV=1
Putative uncharacterized protein OS=Komagataella pastoris (strain GS115 / ATCC 20864) GN=PAS_chr3_0806 PE=4 SV=1
Putative uncharacterized protein OS=Komagataella pastoris (strain GS115 / ATCC 20864) GN=PAS_chr3_0258 PE=4 SV=1
Protein with an N-terminal kelch-like domain OS=Komagataella pastoris (strain GS115 / ATCC 20864) GN=PAS_chr4_0325 PE=4 SV=1
Nucleolar protein, component of the small subunit (SSU) processome containing the U3 snoRNA OS=Komagataella pastoris (strain GS115 / ATCC 20864) GN=PAS_chr4_0667 PE=4 SV=1
Alkaline phosphatase OS=Komagataella pastoris (strain GS115 / ATCC 20864) GN=PAS_chr2-2_0084 PE=3 SV=1
Uncharacterized protein OS=Komagataella pastoris (strain GS115 / ATCC 20864) GN=PAS_chr4_0024 PE=4 SV=1
Uncharacterized protein OS=Komagataella pastoris (strain GS115 / ATCC 20864) GN=PAS_chr4_0070 PE=4 SV=1
Uncharacterized protein OS=Komagataella pastoris (strain GS115 / ATCC 20864) GN=PAS_FragD_0017 PE=4 SV=1
Putative uncharacterized protein OS=Komagataella pastoris (strain GS115 / ATCC 20864) GN=PAS_chr1-4_0486 PE=4 SV=1
Putative ATP-dependent RNA helicase, nucleolar protein OS=Komagataella pastoris (strain GS115 / ATCC 20864) GN=PAS_chr1-3_0272 PE=4 SV=1
Putative uncharacterized protein OS=Komagataella pastoris (strain GS115 / ATCC 20864) GN=PAS_c121_0008 PE=4 SV=1
Part of actin cytoskeleton-regulatory complex Pan1p-Sla1p-End3p OS=Komagataella pastoris (strain GS115 / ATCC 20864) GN=PAS_chr3_0694 PE=4 SV=1
Putative uncharacterized protein OS=Komagataella pastoris (strain GS115 / ATCC 20864) GN=PAS_chr2-1_0218 PE=4 SV=1
Putative uncharacterized protein OS=Komagataella pastoris (strain GS115 / ATCC 20864) GN=PAS_chr2-2_0455 PE=4 SV=1
Putative uncharacterized protein OS=Komagataella pastoris (strain GS115 / ATCC 20864) GN=PAS_chr3_0994 PE=4 SV=1
40S ribosomal protein S8 OS=Komagataella pastoris (strain GS115 / ATCC 20864) GN=PAS_chr1-1_0439 PE=3 SV=1
Tyrosine phosphatase that plays a role in actin filament organization and endocytosis OS=Komagataella pastoris (strain GS115 / ATCC 20864) GN=PAS_chr2-2_0197 PE=4 SV=1
Subunit of the RNA polymerase II mediator complex OS=Komagataella pastoris (strain GS115 / ATCC 20864) GN=PAS_chr3_1134 PE=4 SV=1
Protein kinase OS=Komagataella pastoris (strain GS115 / ATCC 20864) GN=PAS_chr1-3_0106 PE=4 SV=1
UDP-glucose pyrophosphorylase (UGPase), catalyses the reversible formation of UDP-Glc OS=Komagataella pastoris (strain GS115 / ATCC 20864) GN=PAS_chr1-3_0122 PE=4 SV=1
Mu1-like medium subunit of the clathrin-associated protein complex (AP-1) OS=Komagataella pastoris (strain GS115 / ATCC 20864) GN=PAS_chr4_0852 PE=4 SV=1
Putative uncharacterized protein OS=Komagataella pastoris (strain GS115 / ATCC 20864) GN=PAS_chr1-1_0426 PE=4 SV=1
Negative regulatory subunit of the protein phosphatase 1 Ppz1p OS=Komagataella pastoris (strain GS115 / ATCC 20864) GN=PAS_chr3_1031 PE=4 SV=1
Activator of Chs3p (Chitin synthase III), recruits Chs3p to the bud neck via interaction with Bni4p OS=Komagataella pastoris (strain GS115 / ATCC 20864) GN=PAS_chr2-1_0261 PE=4 SV=1
Putative uncharacterized protein OS=Komagataella pastoris (strain GS115 / ATCC 20864) GN=PAS_chr2-1_0432 PE=4 SV=1
Putative uncharacterized protein OS=Komagataella pastoris (strain GS115 / ATCC 20864) GN=PAS_chr2-2_0422 PE=4 SV=1
Non-essential regulatory subunit B of protein phosphatase 2A, which has multiple roles in mitosis an OS=Komagataella pastoris (strain GS115 / ATCC 20864) GN=PAS_chr2-1_0362 PE=4 SV=1
Putative uncharacterized protein OS=Komagataella pastoris (strain GS115 / ATCC 20864) GN=PAS_chr3_1254 PE=4 SV=1
Protein containing SH3-domains, involved in establishing cell polarity and morphogenesis OS=Komagataella pastoris (strain GS115 / ATCC 20864) GN=PAS_chr2-1_0548 PE=4 SV=1
Probable cochaperone, regulates activity of Cyr1p (Adenylyl cyclase) OS=Komagataella pastoris (strain GS115 / ATCC 20864) GN=PAS_chr2-1_0330 PE=4 SV=1
Mitochondrial succinate-fumarate transporter OS=Komagataella pastoris (strain GS115 / ATCC 20864) GN=PAS_chr4_0688 PE=3 SV=1
Putative uncharacterized protein OS=Komagataella pastoris (strain GS115 / ATCC 20864) GN=PAS_chr2-1_0132 PE=4 SV=1
Putative uncharacterized protein OS=Komagataella pastoris (strain GS115 / ATCC 20864) GN=PAS_chr1-3_0046 PE=4 SV=1
Metal resistance protein YCF1 OS=Komagataella pastoris (strain GS115 / ATCC 20864) GN=PAS_chr1-4_0619 PE=3 SV=1
Component of the U2 snRNP OS=Komagataella pastoris (strain GS115 / ATCC 20864) GN=PAS_chr1-1_0065 PE=4 SV=1
Putative uncharacterized protein OS=Komagataella pastoris (strain GS115 / ATCC 20864) GN=PAS_chr1-4_0550 PE=4 SV=1
DNA primase OS=Komagataella pastoris (strain GS115 / ATCC 20864) GN=PAS_chr4_0323 PE=3 SV=1
Peptidyl-prolyl cis-trans isomerase OS=Komagataella pastoris (strain GS115 / ATCC 20864) GN=PAS_chr2-2_0375 PE=4 SV=1
Putative uncharacterized protein OS=Komagataella pastoris (strain GS115 / ATCC 20864) GN=PAS_chr3_0802 PE=4 SV=1
Acetohydroxyacid reductoisomerase OS=Komagataella pastoris (strain GS115 / ATCC 20864) GN=PAS_chr1-1_0432 PE=4 SV=1
Glycerol proton symporter of the plasma membrane, subject to glucose-induced inactivation OS=Komagataella pastoris (strain GS115 / ATCC 20864) GN=PAS_chr3_1099 PE=3 SV=1
Arginine biosynthesis bifunctional protein ArgJ, mitochondrial OS=Komagataella pastoris (strain GS115 / ATCC 20864) GN=PAS_chr3_0176 PE=3 SV=1
Putative uncharacterized protein OS=Komagataella pastoris (strain GS115 / ATCC 20864) GN=PAS_chr3_0871 PE=4 SV=1
Homo-isocitrate dehydrogenase, an NAD-linked mitochondrial enzyme OS=Komagataella pastoris (strain GS115 / ATCC 20864) GN=PAS_chr2-2_0168 PE=3 SV=1
Putative uncharacterized protein OS=Komagataella pastoris (strain GS115 / ATCC 20864) GN=PAS_c121_0019 PE=4 SV=1
Phosphoglucomutase, catalyzes interconversion of glucose-1-phosphate and glucose-6-phospate OS=Komagataella pastoris (strain GS115 / ATCC 20864) GN=PAS_chr2-1_0771 PE=3 SV=1
Pyruvate carboxylase OS=Komagataella pastoris (strain GS115 / ATCC 20864) GN=PAS_chr2-2_0024 PE=3 SV=1
Protein related to mammalian high mobility group proteins OS=Komagataella pastoris (strain GS115 / ATCC 20864) GN=PAS_chr1-1_0442 PE=4 SV=1
DNA polymerase OS=Komagataella pastoris (strain GS115 / ATCC 20864) GN=PAS_chr2-2_0349 PE=3 SV=1
Putative uncharacterized protein OS=Komagataella pastoris (strain GS115 / ATCC 20864) GN=PAS_chr2-2_0463 PE=4 SV=1
Uncharacterized protein OS=Komagataella pastoris (strain GS115 / ATCC 20864) GN=PAS_chr4_0455 PE=4 SV=1
Putative uncharacterized protein OS=Komagataella pastoris (strain GS115 / ATCC 20864) GN=PAS_chr2-1_0740 PE=4 SV=1
Component of the polarisome OS=Komagataella pastoris (strain GS115 / ATCC 20864) GN=PAS_chr3_0816 PE=4 SV=1
Thiol-specific peroxiredoxin, reduces hydroperoxides to protect against oxidative damage OS=Komagataella pastoris (strain GS115 / ATCC 20864) GN=PAS_chr2-1_0502 PE=4 SV=1
Uncharacterized protein OS=Komagataella pastoris (strain GS115 / ATCC 20864) GN=PAS_chr4_0721 PE=4 SV=1
Neutral trehalase, degrades trehalose OS=Komagataella pastoris (strain GS115 / ATCC 20864) GN=PAS_chr4_0816 PE=4 SV=1
Putative uncharacterized protein OS=Komagataella pastoris (strain GS115 / ATCC 20864) GN=PAS_chr2-2_0397 PE=4 SV=1
Malate dehydrogenase OS=Komagataella pastoris (strain GS115 / ATCC 20864) GN=PAS_chr2-1_0238 PE=1 SV=1
Putative uncharacterized protein OS=Komagataella pastoris (strain GS115 / ATCC 20864) GN=PAS_chr3_1023 PE=4 SV=1
Uncharacterized protein OS=Komagataella pastoris (strain GS115 / ATCC 20864) GN=PAS_chr4_0989 PE=4 SV=1
Carnitine acetyltransferase OS=Komagataella pastoris (strain GS115 / ATCC 20864) GN=PAS_chr3_0761 PE=3 SV=1
Mitotic spindle midzone localized microtubule-associated protein (MAP) family member OS=Komagataella pastoris (strain GS115 / ATCC 20864) GN=PAS_chr2-1_0331 PE=4 SV=1
Subunit of the 26S proteasome, substrate of the N-acetyltransferase Nat1p OS=Komagataella pastoris (strain GS115 / ATCC 20864) GN=PAS_chr2-1_0656 PE=4 SV=1
Uncharacterized protein OS=Komagataella pastoris (strain GS115 / ATCC 20864) GN=PAS_chr4_0295 PE=4 SV=1
Golgi matrix protein involved in the structural organization of the cis-Golgi OS=Komagataella pastoris (strain GS115 / ATCC 20864) GN=PAS_chr1-4_0268 PE=4 SV=1
Component of a complex containing the Tor2p kinase and other proteins, which may have a role in regu OS=Komagataella pastoris (strain GS115 / ATCC 20864) GN=PAS_chr2-1_0241 PE=4 SV=1
Lysine--tRNA ligase OS=Komagataella pastoris (strain GS115 / ATCC 20864) GN=PAS_chr3_0949 PE=3 SV=1
Actin-and formin-interacting protein, involved in actin cable nucleation and polarized cell growth OS=Komagataella pastoris (strain GS115 / ATCC 20864) GN=PAS_chr2-1_0372 PE=4 SV=1
EH domain-containing protein OS=Komagataella pastoris (strain GS115 / ATCC 20864) GN=PAS_chr1-3_0032 PE=4 SV=1
Serine/threonine protein kinase involved in regulation of exocytosis OS=Komagataella pastoris (strain GS115 / ATCC 20864) GN=PAS_chr3_0347 PE=4 SV=1
Component of both the SWI/SNF and RSC chromatin remodeling complexes OS=Komagataella pastoris (strain GS115 / ATCC 20864) GN=PAS_chr2-1_0720 PE=3 SV=1
Putative uncharacterized protein OS=Komagataella pastoris (strain GS115 / ATCC 20864) GN=PAS_chr2-1_0845 PE=4 SV=1
Cleavage and polyadenylation factor I (CF I) component involved in cleavage and polyadenylation of m OS=Komagataella pastoris (strain GS115 / ATCC 20864) GN=PAS_chr2-1_0232 PE=4 SV=1
Basic leucine zipper (BZIP) transcription factor required for oxidative stress tolerance OS=Komagataella pastoris (strain GS115 / ATCC 20864) GN=PAS_chr4_0601 PE=4 SV=1
Putative uncharacterized protein OS=Komagataella pastoris (strain GS115 / ATCC 20864) GN=PAS_chr1-4_0434 PE=4 SV=1
Glycerol proton symporter of the plasma membrane OS=Komagataella pastoris (strain GS115 / ATCC 20864) GN=PAS_chr3_1076 PE=3 SV=1
Putative uncharacterized protein OS=Komagataella pastoris (strain GS115 / ATCC 20864) GN=PAS_chr3_0773 PE=4 SV=1
Putative uncharacterized protein OS=Komagataella pastoris (strain GS115 / ATCC 20864) GN=PAS_chr3_1027 PE=4 SV=1
Essential component of the nuclear pore complex OS=Komagataella pastoris (strain GS115 / ATCC 20864) GN=PAS_chr3_0524 PE=4 SV=1
Uncharacterized protein OS=Komagataella pastoris (strain GS115 / ATCC 20864) GN=PAS_chr4_0260 PE=4 SV=1
Alpha 1,3 glucosyltransferase OS=Komagataella pastoris (strain GS115 / ATCC 20864) GN=PAS_chr2-1_0549 PE=4 SV=1
SUMO/Smt3 ligase that promotes the attachment of sumo (Smt3p) OS=Komagataella pastoris (strain GS115 / ATCC 20864) GN=PAS_chr3_0129 PE=4 SV=1
Putative uncharacterized protein OS=Komagataella pastoris (strain GS115 / ATCC 20864) GN=PAS_chr1-1_0489 PE=4 SV=1
Essential protein with similarity to phosducins, which are G-protein regulators OS=Komagataella pastoris (strain GS115 / ATCC 20864) GN=PAS_chr1-4_0342 PE=4 SV=1
Beta~ regulatory subunit of casein kinase 2, a Ser/Thr protein kinase OS=Komagataella pastoris (strain GS115 / ATCC 20864) GN=PAS_chr2-2_0247 PE=4 SV=1
Putative uncharacterized protein OS=Komagataella pastoris (strain GS115 / ATCC 20864) GN=PAS_chr2-2_0376 PE=4 SV=1
Putative uncharacterized protein OS=Komagataella pastoris (strain GS115 / ATCC 20864) GN=PAS_chr1-1_0185 PE=4 SV=1
Membrane bound guanine nucleotide exchange factor (GEF or GDP-release factor) OS=Komagataella pastoris (strain GS115 / ATCC 20864) GN=PAS_chr1-4_0107 PE=4 SV=1
Type II myosin heavy chain, required for wild-type cytokinesis and cell separation OS=Komagataella pastoris (strain GS115 / ATCC 20864) GN=PAS_chr3_0823 PE=4 SV=1
Alpha subunit of fatty acid synthetase OS=Komagataella pastoris (strain GS115 / ATCC 20864) GN=PAS_chr1-4_0295 PE=3 SV=1
DDK (Dbf4-dependent kinase) catalytic subunit OS=Komagataella pastoris (strain GS115 / ATCC 20864) GN=PAS_chr1-4_0192 PE=4 SV=1
RNA-dependent ATPase RNA helicase (DEIH box) OS=Komagataella pastoris (strain GS115 / ATCC 20864) GN=PAS_chr1-4_0051 PE=4 SV=1
Putative uncharacterized protein OS=Komagataella pastoris (strain GS115 / ATCC 20864) GN=PAS_chr1-1_0500 PE=4 SV=1
Subunit of the RAVE complex (Rav1p, Rav2p, Skp1p), which promotes assembly of the V-ATPase holoenzym OS=Komagataella pastoris (strain GS115 / ATCC 20864) GN=PAS_chr2-1_0345 PE=4 SV=1
GTPase-activating protein (RhoGAP) for Rho3p and Rho4p OS=Komagataella pastoris (strain GS115 / ATCC 20864) GN=PAS_chr4_0681 PE=4 SV=1
Member of the PAK family of serine/threonine protein kinases with similarity to Ste20p and Cla4p OS=Komagataella pastoris (strain GS115 / ATCC 20864) GN=PAS_chr4_0313 PE=4 SV=1
Myosin-2 OS=Komagataella pastoris (strain GS115 / ATCC 20864) GN=PAS_FragB_0012 PE=4 SV=1
Calmodulin OS=Komagataella pastoris (strain GS115 / ATCC 20864) GN=PAS_chr2-1_0758 PE=4 SV=1
Putative uncharacterized protein OS=Komagataella pastoris (strain GS115 / ATCC 20864) GN=PAS_chr2-2_0307 PE=4 SV=1
Component of the GARP (Golgi-associated retrograde protein) complex OS=Komagataella pastoris (strain GS115 / ATCC 20864) GN=PAS_chr1-1_0314 PE=4 SV=1
Rho GTPase activating protein (RhoGAP) OS=Komagataella pastoris (strain GS115 / ATCC 20864) GN=PAS_chr2-2_0095 PE=4 SV=1
Positive regulator of genes in multiple nitrogen degradation pathways OS=Komagataella pastoris (strain GS115 / ATCC 20864) GN=PAS_chr1-4_0184 PE=4 SV=1
Putative uncharacterized protein OS=Komagataella pastoris (strain GS115 / ATCC 20864) GN=PAS_chr3_0412 PE=4 SV=1
Nucleoporin involved in nucleocytoplasmic transport OS=Komagataella pastoris (strain GS115 / ATCC 20864) GN=PAS_chr2-2_0325 PE=4 SV=1
RNA binding protein with preference for single stranded tracts of U~s involved in synthesis of both OS=Komagataella pastoris (strain GS115 / ATCC 20864) GN=PAS_chr3_0065 PE=4 SV=1
60S acidic ribosomal protein P2-A OS=Komagataella pastoris (strain GS115 / ATCC 20864) GN=PAS_chr1-4_0490 PE=3 SV=1
Putative transcription factor involved in regulating the response to osmotic stress OS=Komagataella pastoris (strain GS115 / ATCC 20864) GN=PAS_chr4_0093 PE=3 SV=1
Putative uncharacterized protein OS=Komagataella pastoris (strain GS115 / ATCC 20864) GN=PAS_chr3_0727 PE=4 SV=1
Putative uncharacterized protein OS=Komagataella pastoris (strain GS115 / ATCC 20864) GN=PAS_chr1-4_0377 PE=4 SV=1
Uncharacterized protein OS=Komagataella pastoris (strain GS115 / ATCC 20864) GN=PAS_chr4_0257 PE=4 SV=1
Putative uncharacterized protein OS=Komagataella pastoris (strain GS115 / ATCC 20864) GN=PAS_chr3_0286 PE=4 SV=1
Zinc/cadmium resistance protein OS=Komagataella pastoris (strain GS115 / ATCC 20864) GN=PAS_chr4_0896 PE=4 SV=1
Ribosome biogenesis protein YTM1 OS=Komagataella pastoris (strain GS115 / ATCC 20864) GN=YTM1 PE=3 SV=1
Putative uncharacterized protein OS=Komagataella pastoris (strain GS115 / ATCC 20864) GN=PAS_chr1-1_0193 PE=4 SV=1
Sodium/hydrogen exchanger OS=Komagataella pastoris (strain GS115 / ATCC 20864) GN=PAS_chr2-1_0156 PE=3 SV=1
Integral plasma membrane protein required for axial budding in haploid cells OS=Komagataella pastoris (strain GS115 / ATCC 20864) GN=PAS_chr2-1_0700 PE=4 SV=1
Cytoplasmic ATPase that is a ribosome-associated molecular chaperone OS=Komagataella pastoris (strain GS115 / ATCC 20864) GN=PAS_chr3_0731 PE=3 SV=1
Protein kinase involved in bud growth and assembly of the septin ring OS=Komagataella pastoris (strain GS115 / ATCC 20864) GN=PAS_chr1-1_0340 PE=4 SV=1
Protein kinase with similarity to mammalian phosphoinositide-dependent kinase 1 (PDK1) OS=Komagataella pastoris (strain GS115 / ATCC 20864) GN=PAS_chr1-4_0069 PE=4 SV=1
Uncharacterized protein OS=Komagataella pastoris (strain GS115 / ATCC 20864) GN=PAS_chr4_0713 PE=4 SV=1
GTPase-activating protein for the polarity-establishment protein Cdc42p OS=Komagataella pastoris (strain GS115 / ATCC 20864) GN=PAS_chr1-3_0159 PE=4 SV=1
Subunit of the nuclear pore complex (NPC) that is localized to both sides of the pore OS=Komagataella pastoris (strain GS115 / ATCC 20864) GN=PAS_chr1-1_0232 PE=4 SV=1
40S ribosomal protein S1 OS=Komagataella pastoris (strain GS115 / ATCC 20864) GN=RPS1 PE=3 SV=1
Peroxisome biosynthesis protein PAS1 OS=Komagataella pastoris (strain GS115 / ATCC 20864) GN=PAS_chr3_1045 PE=4 SV=1
Protein that interacts with exonuclease Rat1p and Rai1p OS=Komagataella pastoris (strain GS115 / ATCC 20864) GN=PAS_chr1-4_0159 PE=4 SV=1
Essential phosphoprotein component (P150) of the COPII coat of secretory pathway vesicles OS=Komagataella pastoris (strain GS115 / ATCC 20864) GN=PAS_chr1-4_0231 PE=4 SV=1
Putative uncharacterized protein OS=Komagataella pastoris (strain GS115 / ATCC 20864) GN=PAS_chr3_0249 PE=4 SV=1
Putative uncharacterized protein OS=Komagataella pastoris (strain GS115 / ATCC 20864) GN=PAS_chr2-2_0072 PE=4 SV=1
AMP-activated serine/threonine protein kinase found in a complex containing Snf4p and members of the OS=Komagataella pastoris (strain GS115 / ATCC 20864) GN=PAS_chr2-1_0519 PE=4 SV=1
Uncharacterized protein OS=Komagataella pastoris (strain GS115 / ATCC 20864) GN=PAS_chr4_0617 PE=3 SV=1
Oxidant-induced cell-cycle arrest protein 5 OS=Komagataella pastoris (strain GS115 / ATCC 20864) GN=OCA5 PE=3 SV=1
Nexin-1 homolog required for localizing membrane proteins OS=Komagataella pastoris (strain GS115 / ATCC 20864) GN=PAS_chr3_0990 PE=4 SV=1
Uncharacterized protein OS=Komagataella pastoris (strain GS115 / ATCC 20864) GN=PAS_chr4_0980 PE=4 SV=1
Protein that interacts with Cdc48p and Npl4p, involved in recognition of polyubiquitinated proteins OS=Komagataella pastoris (strain GS115 / ATCC 20864) GN=PAS_chr1-1_0055 PE=4 SV=1
Uncharacterized protein OS=Komagataella pastoris (strain GS115 / ATCC 20864) GN=PAS_chr4_0605 PE=4 SV=1
Serine/threonine protein kinase OS=Komagataella pastoris (strain GS115 / ATCC 20864) GN=PAS_chr3_0195 PE=4 SV=1
Putative uncharacterized protein OS=Komagataella pastoris (strain GS115 / ATCC 20864) GN=PAS_chr1-4_0232 PE=4 SV=1
Protein with putative serine active lipase domain OS=Komagataella pastoris (strain GS115 / ATCC 20864) GN=PAS_chr3_1064 PE=4 SV=1
Uncharacterized protein OS=Komagataella pastoris (strain GS115 / ATCC 20864) GN=PAS_chr4_0162 PE=4 SV=1
Putative uncharacterized protein OS=Komagataella pastoris (strain GS115 / ATCC 20864) GN=PAS_FragB_0028 PE=4 SV=1
Aspartokinase OS=Komagataella pastoris (strain GS115 / ATCC 20864) GN=PAS_chr4_0150 PE=3 SV=1
Protein that induces appearance of [PIN+] prion when overproduced OS=Komagataella pastoris (strain GS115 / ATCC 20864) GN=PAS_chr4_0500 PE=4 SV=1
Vacuolar transporter OS=Komagataella pastoris (strain GS115 / ATCC 20864) GN=PAS_chr3_0295 PE=4 SV=1
Essential helicase component of heterohexameric MCM2-7 complexes OS=Komagataella pastoris (strain GS115 / ATCC 20864) GN=PAS_chr1-4_0142 PE=3 SV=1
Putative uncharacterized protein OS=Komagataella pastoris (strain GS115 / ATCC 20864) GN=PAS_chr2-1_0664 PE=4 SV=1
Subunit of both RNase MRP, which cleaves pre-rRNA, and nuclear RNase P, which cleaves tRNA OS=Komagataella pastoris (strain GS115 / ATCC 20864) GN=PAS_chr3_0927 PE=3 SV=1
Ribosomal protein L4 of the large (60S) ribosomal subunit, nearly identical to Rpl8Ap OS=Komagataella pastoris (strain GS115 / ATCC 20864) GN=PAS_chr1-1_0216 PE=4 SV=1
Uncharacterized protein OS=Komagataella pastoris (strain GS115 / ATCC 20864) GN=PAS_chr4_0633 PE=4 SV=1
Mitochondrial aldehyde dehydrogenase OS=Komagataella pastoris (strain GS115 / ATCC 20864) GN=PAS_chr4_0043 PE=3 SV=1
Telobox-containing general regulatory factor OS=Komagataella pastoris (strain GS115 / ATCC 20864) GN=PAS_chr1-4_0281 PE=4 SV=1
Beta subunit of the translation initiation factor eIF2 OS=Komagataella pastoris (strain GS115 / ATCC 20864) GN=PAS_chr1-4_0135 PE=4 SV=1
Uncharacterized protein OS=Komagataella pastoris (strain GS115 / ATCC 20864) GN=PAS_chr4_0962 PE=4 SV=1
Uncharacterized protein OS=Komagataella pastoris (strain GS115 / ATCC 20864) GN=PAS_chr4_0588 PE=4 SV=1
Putative uncharacterized protein OS=Komagataella pastoris (strain GS115 / ATCC 20864) GN=PAS_chr3_1187 PE=3 SV=1
2~-O-ribose methyltransferase, methylates the 2~-O-ribose of nucleotides OS=Komagataella pastoris (strain GS115 / ATCC 20864) GN=PAS_chr3_0947 PE=3 SV=1
Uncharacterized protein OS=Komagataella pastoris (strain GS115 / ATCC 20864) GN=PAS_chr4_0912 PE=3 SV=1
High affinity polyamine permease OS=Komagataella pastoris (strain GS115 / ATCC 20864) GN=PAS_chr3_0848 PE=4 SV=1
Ribosomal protein L30 of the large (60S) ribosomal subunit, nearly identical to Rpl24Ap and has simi OS=Komagataella pastoris (strain GS115 / ATCC 20864) GN=PAS_chr2-1_0086 PE=4 SV=1
Multifunctional enzyme of the peroxisomal fatty acid beta-oxidation pathway OS=Komagataella pastoris (strain GS115 / ATCC 20864) GN=PAS_chr2-1_0776 PE=3 SV=1
cAMP-dependent protein kinase regulatory subunit OS=Komagataella pastoris (strain GS115 / ATCC 20864) GN=PAS_chr3_0546 PE=3 SV=1
Nucleolar protein OS=Komagataella pastoris (strain GS115 / ATCC 20864) GN=PAS_chr3_0903 PE=4 SV=1
One of six subunits of the RNA polymerase III transcription initiation factor complex (TFIIIC) OS=Komagataella pastoris (strain GS115 / ATCC 20864) GN=PAS_chr4_0377 PE=4 SV=1
40S ribosomal protein S21 OS=Komagataella pastoris (strain GS115 / ATCC 20864) GN=PAS_chr3_0596 PE=3 SV=1
Protein containing an N-terminal epsin-like domain OS=Komagataella pastoris (strain GS115 / ATCC 20864) GN=PAS_chr4_0763 PE=4 SV=1
Protein interacting with poly(A)-binding protein Pab1p OS=Komagataella pastoris (strain GS115 / ATCC 20864) GN=PAS_chr4_0288 PE=4 SV=1
Type II HSP40 co-chaperone that interacts with the HSP70 protein Ssa1p OS=Komagataella pastoris (strain GS115 / ATCC 20864) GN=PAS_chr2-2_0151 PE=4 SV=1
Cytosolic L-asparaginase OS=Komagataella pastoris (strain GS115 / ATCC 20864) GN=PAS_chr3_0591 PE=3 SV=1
Putative uncharacterized protein OS=Komagataella pastoris (strain GS115 / ATCC 20864) GN=PAS_chr2-1_0819 PE=4 SV=1
Protein that localizes to chromatin and has a role in regulation of histone gene expression OS=Komagataella pastoris (strain GS115 / ATCC 20864) GN=PAS_chr2-1_0401 PE=4 SV=1
Transcription factor that stimulates expression of proteasome genes OS=Komagataella pastoris (strain GS115 / ATCC 20864) GN=PAS_chr3_0689 PE=4 SV=1
AdoMet-dependent methyltransferase involved in rRNA processing and 60S ribosomal subunit maturation OS=Komagataella pastoris (strain GS115 / ATCC 20864) GN=PAS_chr4_0464 PE=3 SV=1
NAD(+)-dependent glutamate dehydrogenase, degrades glutamate to ammonia and alpha-ketoglutarate OS=Komagataella pastoris (strain GS115 / ATCC 20864) GN=PAS_chr2-1_0311 PE=4 SV=1
Nuclear protein involved in asymmetric localization of ASH1 mRNA OS=Komagataella pastoris (strain GS115 / ATCC 20864) GN=PAS_chr1-1_0414 PE=4 SV=1
Protein kinase involved in regulating diverse events including vesicular trafficking, DNA repair, an OS=Komagataella pastoris (strain GS115 / ATCC 20864) GN=PAS_chr2-1_0219 PE=4 SV=1
Fatty acid elongase OS=Komagataella pastoris (strain GS115 / ATCC 20864) GN=PAS_chr3_0602 PE=4 SV=1
Putative serine/threonine protein kinase OS=Komagataella pastoris (strain GS115 / ATCC 20864) GN=PAS_chr2-2_0038 PE=4 SV=1
One of five related septins (Cdc3p, Cdc10p, Cdc11p, Cdc12p, Shs1p) OS=Komagataella pastoris (strain GS115 / ATCC 20864) GN=PAS_chr3_0977 PE=3 SV=1
Uncharacterized protein OS=Komagataella pastoris (strain GS115 / ATCC 20864) GN=PAS_chr4_0950 PE=4 SV=1
Vacuolar ATPase V1 domain subunit A containing the catalytic nucleotide binding sites OS=Komagataella pastoris (strain GS115 / ATCC 20864) GN=PAS_chr1-1_0309 PE=3 SV=1
Protein binding phosphatidylinositol 3-phosphate, involved in telomere-proximal repression of gene e OS=Komagataella pastoris (strain GS115 / ATCC 20864) GN=PAS_chr2-1_0229 PE=4 SV=1
Plasma membrane ATP-binding cassette (ABC) transporter, multidrug transporter involved in multidrug OS=Komagataella pastoris (strain GS115 / ATCC 20864) GN=PAS_chr2-1_0280 PE=3 SV=1
Putative uncharacterized protein OS=Komagataella pastoris (strain GS115 / ATCC 20864) GN=PAS_chr3_1052 PE=4 SV=1
Glyceraldehyde-3-phosphate dehydrogenase OS=Komagataella pastoris (strain GS115 / ATCC 20864) GN=PAS_chr2-1_0437 PE=3 SV=1
Putative magnesium transporter OS=Komagataella pastoris (strain GS115 / ATCC 20864) GN=PAS_chr2-2_0260 PE=4 SV=1
Subunit of the heterohexameric cochaperone prefoldin complex which binds specifically to cytosolic c OS=Komagataella pastoris (strain GS115 / ATCC 20864) GN=PAS_chr2-1_0194 PE=3 SV=1
Putative uncharacterized protein OS=Komagataella pastoris (strain GS115 / ATCC 20864) GN=PAS_chr3_1208 PE=4 SV=1
Putative uncharacterized protein OS=Komagataella pastoris (strain GS115 / ATCC 20864) GN=PAS_chr2-2_0324 PE=4 SV=1
Putative FAD transporter OS=Komagataella pastoris (strain GS115 / ATCC 20864) GN=PAS_chr1-1_0176 PE=4 SV=1
Putative uncharacterized protein OS=Komagataella pastoris (strain GS115 / ATCC 20864) GN=PAS_chr2-1_0645 PE=4 SV=1
Protein binding phosphatidylinositol 3-phosphate OS=Komagataella pastoris (strain GS115 / ATCC 20864) GN=PAS_chr1-1_0235 PE=4 SV=1
Uncharacterized protein OS=Komagataella pastoris (strain GS115 / ATCC 20864) GN=PAS_chr4_0252 PE=4 SV=1
RNA binding protein that sequesters CLN3 mRNA in cytoplasmic foci OS=Komagataella pastoris (strain GS115 / ATCC 20864) GN=PAS_chr3_0978 PE=4 SV=1
Putative transporter, member of the sugar porter family OS=Komagataella pastoris (strain GS115 / ATCC 20864) GN=PAS_chr2-1_0728 PE=3 SV=1
Membrane protein OS=Komagataella pastoris (strain GS115 / ATCC 20864) GN=PAS_chr3_0930 PE=4 SV=1
Putative uncharacterized protein OS=Komagataella pastoris (strain GS115 / ATCC 20864) GN=PAS_chr3_0700 PE=4 SV=1
Putative uncharacterized protein OS=Komagataella pastoris (strain GS115 / ATCC 20864) GN=PAS_chr1-1_0257 PE=4 SV=1
Alpha 7 subunit of the 20S proteasome OS=Komagataella pastoris (strain GS115 / ATCC 20864) GN=PAS_chr3_0699 PE=4 SV=1
Primary component of eisosomes OS=Komagataella pastoris (strain GS115 / ATCC 20864) GN=PAS_chr1-4_0569 PE=4 SV=1
Carbon source-responsive zinc-finger transcription factor OS=Komagataella pastoris (strain GS115 / ATCC 20864) GN=PAS_chr4_0487 PE=4 SV=1
Putative uncharacterized protein OS=Komagataella pastoris (strain GS115 / ATCC 20864) GN=PAS_chr2-1_0516 PE=4 SV=1
Coronin OS=Komagataella pastoris (strain GS115 / ATCC 20864) GN=PAS_chr2-1_0591 PE=3 SV=1
RNA polymerase III subunit C37 OS=Komagataella pastoris (strain GS115 / ATCC 20864) GN=PAS_chr4_0031 PE=4 SV=1
Actin-binding protein of the cortical actin cytoskeleton OS=Komagataella pastoris (strain GS115 / ATCC 20864) GN=PAS_chr2-2_0320 PE=4 SV=1
Putative vacuolar Fe2+/Mn2+ transporter OS=Komagataella pastoris (strain GS115 / ATCC 20864) GN=PAS_chr3_0372 PE=4 SV=1
Poly(A) binding protein, part of the 3~-end RNA-processing complex, mediates interactions between th OS=Komagataella pastoris (strain GS115 / ATCC 20864) GN=PAS_chr2-1_0097 PE=4 SV=1
Cytosolic protein required for sporulation OS=Komagataella pastoris (strain GS115 / ATCC 20864) GN=PAS_chr1-4_0597 PE=4 SV=1
Putative uncharacterized protein OS=Komagataella pastoris (strain GS115 / ATCC 20864) GN=PAS_chr1-1_0399 PE=4 SV=1
Glucose-repressible protein kinase involved in signal transduction during cell proliferation in resp OS=Komagataella pastoris (strain GS115 / ATCC 20864) GN=PAS_chr3_0148 PE=4 SV=1
ATP synthase subunit alpha OS=Komagataella pastoris (strain GS115 / ATCC 20864) GN=PAS_chr3_0576 PE=3 SV=1
Protein serine/threonine kinase required for vesicle formation in autophagy OS=Komagataella pastoris (strain GS115 / ATCC 20864) GN=PAS_chr2-1_0641 PE=4 SV=1
Hsp90 cochaperone, interacts with the Ssa group of the cytosolic Hsp70 chaperones OS=Komagataella pastoris (strain GS115 / ATCC 20864) GN=PAS_chr2-1_0518 PE=4 SV=1
Topoisomerase II-associated deadenylation-dependent mRNA-decapping factor OS=Komagataella pastoris (strain GS115 / ATCC 20864) GN=PAS_chr2-2_0378 PE=4 SV=1
Aminophospholipid translocase (Flippase) that localizes primarily to the plasma membrane OS=Komagataella pastoris (strain GS115 / ATCC 20864) GN=PAS_chr2-1_0057 PE=4 SV=1
Acetyltransferase required for the establishment of sister chromatid cohesion OS=Komagataella pastoris (strain GS115 / ATCC 20864) GN=PAS_chr3_0914 PE=4 SV=1
Glycerol 3-phosphate/dihydroxyacetone phosphate dual substrate-specific sn-1 acyltransferase of the OS=Komagataella pastoris (strain GS115 / ATCC 20864) GN=PAS_chr3_0073 PE=4 SV=1
One of six ATPases of the 19S regulatory particle of the 26S proteasome OS=Komagataella pastoris (strain GS115 / ATCC 20864) GN=PAS_chr4_0736 PE=4 SV=1
Uncharacterized protein OS=Komagataella pastoris (strain GS115 / ATCC 20864) GN=PAS_chr4_0660 PE=4 SV=1
Essential subunit of the histone deacetylase Rpd3S complex OS=Komagataella pastoris (strain GS115 / ATCC 20864) GN=PAS_chr3_0174 PE=4 SV=1
cAMP-dependent protein kinase catalytic subunit OS=Komagataella pastoris (strain GS115 / ATCC 20864) GN=PAS_chr1-4_0357 PE=4 SV=1
Subunit of the RNA polymerase II mediator complex OS=Komagataella pastoris (strain GS115 / ATCC 20864) GN=PAS_chr3_0152 PE=4 SV=1
Putative uncharacterized protein OS=Komagataella pastoris (strain GS115 / ATCC 20864) GN=PAS_chr3_0717 PE=4 SV=1
Uncharacterized protein OS=Komagataella pastoris (strain GS115 / ATCC 20864) GN=PAS_chr4_0947 PE=4 SV=1
Putative uncharacterized protein OS=Komagataella pastoris (strain GS115 / ATCC 20864) GN=PAS_chr2-2_0321 PE=4 SV=1
5-phospho-ribosyl-1(Alpha)-pyrophosphate synthetase, synthesizes PRPP OS=Komagataella pastoris (strain GS115 / ATCC 20864) GN=PAS_chr2-2_0174 PE=4 SV=1
Vacuolar H+/Ca2+ exchanger involved in control of cytosolic Ca2+ concentration OS=Komagataella pastoris (strain GS115 / ATCC 20864) GN=PAS_FragD_0024 PE=4 SV=1
Plasma membrane localized protein that protects membranes from desiccation OS=Komagataella pastoris (strain GS115 / ATCC 20864) GN=PAS_chr4_0627 PE=4 SV=1
3-phosphoglycerate dehydrogenase, catalyzes the first step in serine and glycine biosynthesis OS=Komagataella pastoris (strain GS115 / ATCC 20864) GN=PAS_chr2-1_0657 PE=3 SV=1
Putative uncharacterized protein OS=Komagataella pastoris (strain GS115 / ATCC 20864) GN=PAS_chr3_1203 PE=4 SV=1
Component of the microtubule-nucleating Tub4p (Gamma-tubulin) complex OS=Komagataella pastoris (strain GS115 / ATCC 20864) GN=PAS_chr2-2_0354 PE=4 SV=1
GTP-cyclohydrolase I, catalyzes the first step in the folic acid biosynthetic pathway OS=Komagataella pastoris (strain GS115 / ATCC 20864) GN=PAS_chr1-1_0062 PE=3 SV=1
Key endocytic protein involved in a network of interactions with other endocytic proteins OS=Komagataella pastoris (strain GS115 / ATCC 20864) GN=PAS_chr2-1_0651 PE=4 SV=1
Non-essential tetra-spanning membrane protein found mostly in the late Golgi OS=Komagataella pastoris (strain GS115 / ATCC 20864) GN=PAS_chr1-1_0372 PE=4 SV=1
Putative uncharacterized protein OS=Komagataella pastoris (strain GS115 / ATCC 20864) GN=PAS_chr3_0505 PE=4 SV=1
Serine/threonine protein kinase OS=Komagataella pastoris (strain GS115 / ATCC 20864) GN=PAS_c034_0028 PE=4 SV=1
Putative uncharacterized protein OS=Komagataella pastoris (strain GS115 / ATCC 20864) GN=PAS_chr2-1_0828 PE=4 SV=1
Alpha 5 subunit of the 20S proteasome involved in ubiquitin-dependent catabolism OS=Komagataella pastoris (strain GS115 / ATCC 20864) GN=PAS_chr3_1129 PE=4 SV=1
Glycerol-3-phosphate/dihydroxyacetone phosphate dual substrate-specific sn-1 acyltransferase OS=Komagataella pastoris (strain GS115 / ATCC 20864) GN=PAS_chr1-3_0081 PE=4 SV=1
Putative uncharacterized protein OS=Komagataella pastoris (strain GS115 / ATCC 20864) GN=PAS_FragB_0031 PE=4 SV=1
Protein component of the large (60S) ribosomal subunit OS=Komagataella pastoris (strain GS115 / ATCC 20864) GN=PAS_chr2-2_0109 PE=3 SV=1
Transcriptional activator of proline utilization genes OS=Komagataella pastoris (strain GS115 / ATCC 20864) GN=PAS_chr2-1_0329 PE=4 SV=1

## Sheet: W-M
prot_description	Sample:W-M
Uncharacterized protein OS=Komagataella pastoris (strain GS115 / ATCC 20864) GN=PAS_chr4_0230 PE=4 SV=1
Low-affinity phosphate transporter of the vacuolar membrane OS=Komagataella pastoris (strain GS115 / ATCC 20864) GN=PAS_chr3_0495 PE=4 SV=1
Putative uncharacterized protein OS=Komagataella pastoris (strain GS115 / ATCC 20864) GN=PAS_chr2-1_0646 PE=4 SV=1
Ubiquitin-specific protease that removes ubiquitin from ubiquitinated proteins, cleaves at the C ter OS=Komagataella pastoris (strain GS115 / ATCC 20864) GN=PAS_chr3_0117 PE=4 SV=1
Regulatory subunit of trehalose-6-phosphate synthase/phosphatase complex OS=Komagataella pastoris (strain GS115 / ATCC 20864) GN=PAS_chr2-1_0739 PE=4 SV=1
RNA binding protein that negatively regulates growth rate OS=Komagataella pastoris (strain GS115 / ATCC 20864) GN=PAS_chr1-4_0223 PE=4 SV=1
Sorting nexin OS=Komagataella pastoris (strain GS115 / ATCC 20864) GN=PAS_chr3_0639 PE=4 SV=1
Putative uncharacterized protein OS=Komagataella pastoris (strain GS115 / ATCC 20864) GN=PAS_chr1-4_0415 PE=4 SV=1
Eukaryotic translation initiation factor 3 subunit C OS=Komagataella pastoris (strain GS115 / ATCC 20864) GN=NIP1 PE=3 SV=1
Putative uncharacterized protein OS=Komagataella pastoris (strain GS115 / ATCC 20864) GN=PAS_chr2-2_0472 PE=4 SV=1
Nucleolar protein involved in pre-rRNA processing OS=Komagataella pastoris (strain GS115 / ATCC 20864) GN=PAS_chr3_0110 PE=4 SV=1
E3 ubiquitin ligase for Rad6p OS=Komagataella pastoris (strain GS115 / ATCC 20864) GN=PAS_chr4_0172 PE=4 SV=1
Adenylate cyclase, required for cAMP production and cAMP-dependent protein kinase signaling OS=Komagataella pastoris (strain GS115 / ATCC 20864) GN=PAS_chr4_0356 PE=4 SV=1
Predicted cytoskeleton protein OS=Komagataella pastoris (strain GS115 / ATCC 20864) GN=PAS_chr3_0518 PE=4 SV=1
TFIID subunit (150 kDa), involved in RNA polymerase II transcription initiation OS=Komagataella pastoris (strain GS115 / ATCC 20864) GN=PAS_chr2-2_0295 PE=4 SV=1
Putative uncharacterized protein OS=Komagataella pastoris (strain GS115 / ATCC 20864) GN=PAS_chr2-2_0296 PE=4 SV=1
Protein of the mitochondrial outer surface OS=Komagataella pastoris (strain GS115 / ATCC 20864) GN=PAS_chr2-1_0535 PE=4 SV=1
F-box receptor protein, subunit of the Skp1-Cdc53-F-box receptor (SCF) E3 ubiquitin ligase complex OS=Komagataella pastoris (strain GS115 / ATCC 20864) GN=PAS_chr2-1_0200 PE=4 SV=1
Putative uncharacterized protein OS=Komagataella pastoris (strain GS115 / ATCC 20864) GN=PAS_chr1-4_0603 PE=4 SV=1
Protein that interacts with mitotic cyclin Clb2p OS=Komagataella pastoris (strain GS115 / ATCC 20864) GN=PAS_chr2-2_0172 PE=3 SV=1
Protein containing a CUE domain that binds ubiquitin OS=Komagataella pastoris (strain GS115 / ATCC 20864) GN=PAS_chr2-2_0292 PE=4 SV=1
Dynamin-like GTPase required for vacuolar sorting OS=Komagataella pastoris (strain GS115 / ATCC 20864) GN=PAS_chr1-4_0644 PE=3 SV=1
Essential protein involved in intracellular protein transport OS=Komagataella pastoris (strain GS115 / ATCC 20864) GN=PAS_chr4_0088 PE=4 SV=1
Putative uncharacterized protein OS=Komagataella pastoris (strain GS115 / ATCC 20864) GN=PAS_chr3_0574 PE=4 SV=1
Uncharacterized protein OS=Komagataella pastoris (strain GS115 / ATCC 20864) GN=PAS_chr4_0390 PE=4 SV=1
Adenylate kinase OS=Komagataella pastoris (strain GS115 / ATCC 20864) GN=PAS_chr3_0257 PE=3 SV=1
Putative uncharacterized protein OS=Komagataella pastoris (strain GS115 / ATCC 20864) GN=PAS_chr2-1_0722 PE=4 SV=1
Eukaryotic translation initiation factor 3 subunit A OS=Komagataella pastoris (strain GS115 / ATCC 20864) GN=TIF32 PE=3 SV=1
Co-chaperone that binds to Hsp82p and activates its ATPase activity OS=Komagataella pastoris (strain GS115 / ATCC 20864) GN=PAS_chr3_0170 PE=4 SV=1
GTPase activating protein (GAP) for Rho1p, involved in signaling to the actin cytoskeleton, null mut OS=Komagataella pastoris (strain GS115 / ATCC 20864) GN=PAS_chr2-1_0117 PE=4 SV=1
BAR domain-containing protein that localizes to both early and late Golgi vesicles OS=Komagataella pastoris (strain GS115 / ATCC 20864) GN=PAS_chr4_0182 PE=4 SV=1
Putative uncharacterized protein OS=Komagataella pastoris (strain GS115 / ATCC 20864) GN=PAS_chr1-1_0478 PE=4 SV=1
Cytoskeletal protein binding protein required for assembly of the cortical actin cytoskeleton OS=Komagataella pastoris (strain GS115 / ATCC 20864) GN=PAS_chr2-1_0366 PE=4 SV=1
Protein component of the small (40S) ribosomal subunit OS=Komagataella pastoris (strain GS115 / ATCC 20864) GN=PAS_chr3_0290 PE=4 SV=1
Regulatory subunit of the Atg1p signaling complex OS=Komagataella pastoris (strain GS115 / ATCC 20864) GN=PAS_chr2-2_0432 PE=4 SV=1
Component (70 kDa) of the TOM (Translocase of outer membrane) complex OS=Komagataella pastoris (strain GS115 / ATCC 20864) GN=PAS_chr2-2_0370 PE=4 SV=1
Putative uncharacterized protein OS=Komagataella pastoris (strain GS115 / ATCC 20864) GN=PAS_chr2-1_0876 PE=4 SV=1
Essential protein possibly involved in secretion OS=Komagataella pastoris (strain GS115 / ATCC 20864) GN=PAS_chr3_0292 PE=4 SV=1
Putative phosphopantothenoylcysteine synthetase (PPCS) OS=Komagataella pastoris (strain GS115 / ATCC 20864) GN=PAS_chr2-2_0204 PE=4 SV=1
Protein proposed to be involved in the modification of N-linked oligosaccharides OS=Komagataella pastoris (strain GS115 / ATCC 20864) GN=PAS_chr2-2_0121 PE=4 SV=1
Putative uncharacterized protein OS=Komagataella pastoris (strain GS115 / ATCC 20864) GN=PAS_chr1-1_0148 PE=4 SV=1
Ubiquitin-like protein of the SUMO family OS=Komagataella pastoris (strain GS115 / ATCC 20864) GN=PAS_chr1-4_0205 PE=4 SV=1
Uncharacterized protein OS=Komagataella pastoris (strain GS115 / ATCC 20864) GN=PAS_chr4_0797 PE=4 SV=1
Uncharacterized protein OS=Komagataella pastoris (strain GS115 / ATCC 20864) GN=PAS_chr4_0959 PE=4 SV=1
Pseudouridine synthase catalytic subunit of box H/ACA small nucleolar ribonucleoprotein particles OS=Komagataella pastoris (strain GS115 / ATCC 20864) GN=PAS_chr2-2_0149 PE=4 SV=1
Protein involved in G2/M phase progression and response to DNA damage, interacts with Rad53p OS=Komagataella pastoris (strain GS115 / ATCC 20864) GN=PAS_chr2-2_0211 PE=4 SV=1
Uncharacterized protein OS=Komagataella pastoris (strain GS115 / ATCC 20864) GN=PAS_chr4_0550 PE=4 SV=1
Putative uncharacterized protein OS=Komagataella pastoris (strain GS115 / ATCC 20864) GN=PAS_chr1-4_0312 PE=4 SV=1
Putative uncharacterized protein OS=Komagataella pastoris (strain GS115 / ATCC 20864) GN=PAS_chr2-2_0214 PE=4 SV=1
Dual-specificity protein phosphatase OS=Komagataella pastoris (strain GS115 / ATCC 20864) GN=PAS_chr3_0618 PE=4 SV=1
Thioredoxin reductase OS=Komagataella pastoris (strain GS115 / ATCC 20864) GN=PAS_chr2-2_0480 PE=3 SV=1
Clathrin heavy chain, subunit of the major coat protein OS=Komagataella pastoris (strain GS115 / ATCC 20864) GN=PAS_chr1-4_0546 PE=4 SV=1
UBX (Ubiquitin regulatory X) domain-containing protein that regulates Glc7p phosphatase activity and OS=Komagataella pastoris (strain GS115 / ATCC 20864) GN=PAS_chr2-1_0159 PE=4 SV=1
Subunit of the NuA3 histone acetyltransferase complex that acetylates histone H3 OS=Komagataella pastoris (strain GS115 / ATCC 20864) GN=PAS_FragD_0029 PE=4 SV=1
Component of the Sin3p-Rpd3p histone deacetylase complex OS=Komagataella pastoris (strain GS115 / ATCC 20864) GN=PAS_chr3_0245 PE=4 SV=1
Dihydroxyacetone kinase, required for detoxification of dihydroxyacetone (DHA) OS=Komagataella pastoris (strain GS115 / ATCC 20864) GN=PAS_chr3_0841 PE=4 SV=1
S-adenosyl-L-methionine-dependent tRNA: m5C-methyltransferase OS=Komagataella pastoris (strain GS115 / ATCC 20864) GN=PAS_chr4_0445 PE=4 SV=1
Delta(24)-sterol C-methyltransferase OS=Komagataella pastoris (strain GS115 / ATCC 20864) GN=PAS_chr3_0371 PE=4 SV=1
Cholinephosphate cytidylyltransferase, also known as CTP:phosphocholine cytidylyltransferase OS=Komagataella pastoris (strain GS115 / ATCC 20864) GN=PAS_chr2-2_0401 PE=4 SV=1
Delta(9) fatty acid desaturase OS=Komagataella pastoris (strain GS115 / ATCC 20864) GN=PAS_chr2-1_0072 PE=3 SV=1
Fe-S cluster assembly protein DRE2 OS=Komagataella pastoris (strain GS115 / ATCC 20864) GN=DRE2 PE=3 SV=1
Heat shock protein that cooperates with Ydj1p (Hsp40) and Ssa1p (Hsp70) OS=Komagataella pastoris (strain GS115 / ATCC 20864) GN=PAS_chr1-3_0102 PE=3 SV=1
One of two (See also PSK1) PAS domain containing S/T protein kinases OS=Komagataella pastoris (strain GS115 / ATCC 20864) GN=PAS_chr4_0076 PE=4 SV=1
Putative ATP-dependent permease of the ABC transporter family of proteins OS=Komagataella pastoris (strain GS115 / ATCC 20864) GN=PAS_chr3_0935 PE=4 SV=1
Uncharacterized protein OS=Komagataella pastoris (strain GS115 / ATCC 20864) GN=PAS_chr4_0379 PE=4 SV=1
Uncharacterized protein OS=Komagataella pastoris (strain GS115 / ATCC 20864) GN=PAS_chr4_0602 PE=4 SV=1
Putative uncharacterized protein OS=Komagataella pastoris (strain GS115 / ATCC 20864) GN=PAS_chr3_0297 PE=4 SV=1
Uncharacterized protein OS=Komagataella pastoris (strain GS115 / ATCC 20864) GN=PAS_chr4_0922 PE=4 SV=1
ADP-ribosylation factor (ARF) GTPase activating protein (GAP) effector OS=Komagataella pastoris (strain GS115 / ATCC 20864) GN=PAS_chr1-4_0340 PE=4 SV=1
Heat shock protein Hsp90 OS=Komagataella pastoris (strain GS115 / ATCC 20864) GN=PAS_chr1-4_0130 PE=3 SV=1
Uncharacterized protein OS=Komagataella pastoris (strain GS115 / ATCC 20864) GN=PAS_chr4_0372 PE=4 SV=1
ADP-ribosylation factor GTPase activating protein (ARF GAP), involved in ER-Golgi transport OS=Komagataella pastoris (strain GS115 / ATCC 20864) GN=PAS_chr3_0974 PE=4 SV=1
Protein kinase, phosphorylates the alpha-subunit of translation initiation factor eIF2 (Sui2p) OS=Komagataella pastoris (strain GS115 / ATCC 20864) GN=PAS_chr3_0850 PE=4 SV=1
Putative uncharacterized protein OS=Komagataella pastoris (strain GS115 / ATCC 20864) GN=PAS_chr1-1_0425 PE=4 SV=1
Putative uncharacterized protein OS=Komagataella pastoris (strain GS115 / ATCC 20864) GN=PAS_chr1-1_0387 PE=4 SV=1
ADP-ribosylation factor GTPase activating protein (ARF GAP) OS=Komagataella pastoris (strain GS115 / ATCC 20864) GN=PAS_chr3_0559 PE=4 SV=1
Putative uncharacterized protein OS=Komagataella pastoris (strain GS115 / ATCC 20864) GN=PAS_chr2-2_0261 PE=4 SV=1
Subunit of a possibly tetrameric trichostatin A-sensitive class II histone deacetylase complex OS=Komagataella pastoris (strain GS115 / ATCC 20864) GN=PAS_chr2-2_0426 PE=4 SV=1
Catalytic subunit of the Dcp1p-Dcp2p decapping enzyme complex OS=Komagataella pastoris (strain GS115 / ATCC 20864) GN=PAS_chr4_0194 PE=4 SV=1
General negative regulator of transcription subunit 4 OS=Komagataella pastoris (strain GS115 / ATCC 20864) GN=PAS_chr1-4_0594 PE=4 SV=1
Subunit of the origin recognition complex, which directs DNA replication OS=Komagataella pastoris (strain GS115 / ATCC 20864) GN=PAS_chr3_0941 PE=4 SV=1
Methionine and cysteine synthase (O-acetyl homoserine-O-acetyl serine sulfhydrylase) OS=Komagataella pastoris (strain GS115 / ATCC 20864) GN=PAS_chr4_0330 PE=3 SV=1
Vacuolar protein sorting-associated protein 35 OS=Komagataella pastoris (strain GS115 / ATCC 20864) GN=PAS_chr1-4_0503 PE=3 SV=1
ER membrane protein OS=Komagataella pastoris (strain GS115 / ATCC 20864) GN=PAS_chr3_0626 PE=4 SV=1
Protein that binds to cruciform DNA structures OS=Komagataella pastoris (strain GS115 / ATCC 20864) GN=PAS_chr3_0627 PE=4 SV=1
Essential nucleolar protein required for 40S ribosome biogenesis OS=Komagataella pastoris (strain GS115 / ATCC 20864) GN=PAS_chr1-4_0098 PE=4 SV=1
Protein involved in the regulation of cell wall synthesis OS=Komagataella pastoris (strain GS115 / ATCC 20864) GN=PAS_chr3_0768 PE=4 SV=1
Protein component of the large (60S) ribosomal subunit, nearly identical to Rpl12Ap OS=Komagataella pastoris (strain GS115 / ATCC 20864) GN=PAS_chr1-1_0189 PE=3 SV=1
Catalase OS=Komagataella pastoris (strain GS115 / ATCC 20864) GN=PAS_chr2-2_0131 PE=3 SV=1
Uncharacterized protein OS=Komagataella pastoris (strain GS115 / ATCC 20864) GN=PAS_chr4_0407 PE=4 SV=1
Putative uncharacterized protein OS=Komagataella pastoris (strain GS115 / ATCC 20864) GN=PAS_chr3_1030 PE=4 SV=1
One of three possible beta-subunits of the Snf1 kinase complex OS=Komagataella pastoris (strain GS115 / ATCC 20864) GN=PAS_chr1-4_0498 PE=4 SV=1
Putative uncharacterized protein OS=Komagataella pastoris (strain GS115 / ATCC 20864) GN=PAS_chr1-1_0422 PE=4 SV=1
Component of mRNP complexes associated with polyribosomes OS=Komagataella pastoris (strain GS115 / ATCC 20864) GN=PAS_chr1-4_0428 PE=4 SV=1
Cyclin (Bur2p)-dependent protein kinase that functions in transcriptional regulation OS=Komagataella pastoris (strain GS115 / ATCC 20864) GN=PAS_chr3_0375 PE=4 SV=1
Putative uncharacterized protein OS=Komagataella pastoris (strain GS115 / ATCC 20864) GN=PAS_chr1-3_0180 PE=4 SV=1
Putative uncharacterized protein OS=Komagataella pastoris (strain GS115 / ATCC 20864) GN=PAS_chr1-3_0111 PE=4 SV=1
Bifunctional carbamoylphosphate synthetase (CPSase)-aspartate transcarbamylase (ATCase) OS=Komagataella pastoris (strain GS115 / ATCC 20864) GN=PAS_chr2-2_0142 PE=3 SV=1
Putative uncharacterized protein OS=Komagataella pastoris (strain GS115 / ATCC 20864) GN=PAS_chr2-2_0352 PE=4 SV=1
ATPase in ER, nuclear membrane and cytosol with homology to mammalian p97 OS=Komagataella pastoris (strain GS115 / ATCC 20864) GN=PAS_FragD_0026 PE=4 SV=1
Uncharacterized protein OS=Komagataella pastoris (strain GS115 / ATCC 20864) GN=PAS_chr4_0711 PE=4 SV=1
Hsp70 protein that interacts with Zuo1p (A DnaJ homolog) to form a ribosome-associated complex OS=Komagataella pastoris (strain GS115 / ATCC 20864) GN=PAS_chr1-1_0036 PE=3 SV=1
Putative uncharacterized protein OS=Komagataella pastoris (strain GS115 / ATCC 20864) GN=PAS_chr1-3_0173 PE=4 SV=1
Protein that interacts with silencing proteins at the telomere OS=Komagataella pastoris (strain GS115 / ATCC 20864) GN=PAS_chr4_0833 PE=4 SV=1
Eukaryotic initiation factor (EIF) 2A OS=Komagataella pastoris (strain GS115 / ATCC 20864) GN=PAS_chr2-2_0058 PE=4 SV=1
Tryptophan synthase involved in tryptophan biosynthesis OS=Komagataella pastoris (strain GS115 / ATCC 20864) GN=PAS_chr2-1_0679 PE=3 SV=1
Protein component of the large (60S) ribosomal subunit, identical to Rpl35Ap OS=Komagataella pastoris (strain GS115 / ATCC 20864) GN=PAS_chr1-1_0302 PE=3 SV=1
Beta subunit of fatty acid synthetase; catalyzes the synthesis of long-chain saturated fatty acids OS=Komagataella pastoris (strain GS115 / ATCC 20864) GN=PAS_chr1-1_0008 PE=4 SV=1
Protein involved in 20S proteasome assembly OS=Komagataella pastoris (strain GS115 / ATCC 20864) GN=PAS_chr2-1_0552 PE=4 SV=1
Catalytic subunit of the COP9 signalosome (CSN) complex OS=Komagataella pastoris (strain GS115 / ATCC 20864) GN=PAS_chr1-3_0105 PE=4 SV=1
Uncharacterized protein OS=Komagataella pastoris (strain GS115 / ATCC 20864) GN=PAS_chr4_0551 PE=4 SV=1
Putative transporter, member of the sugar porter family OS=Komagataella pastoris (strain GS115 / ATCC 20864) GN=PAS_chr1-3_0011 PE=3 SV=1
Calmodulin-dependent protein kinase OS=Komagataella pastoris (strain GS115 / ATCC 20864) GN=PAS_chr1-4_0302 PE=4 SV=1
Uncharacterized protein OS=Komagataella pastoris (strain GS115 / ATCC 20864) GN=PAS_chr4_0884 PE=4 SV=1
Putative uncharacterized protein OS=Komagataella pastoris (strain GS115 / ATCC 20864) GN=PAS_chr2-1_0874 PE=4 SV=1
Putative uncharacterized protein OS=Komagataella pastoris (strain GS115 / ATCC 20864) GN=PAS_chr2-1_0434 PE=4 SV=1
Phosphorylase OS=Komagataella pastoris (strain GS115 / ATCC 20864) GN=PAS_chr2-1_0173 PE=3 SV=1
Protein required for proper cell fusion and cell morphology OS=Komagataella pastoris (strain GS115 / ATCC 20864) GN=PAS_chr3_0298 PE=4 SV=1
Putative uncharacterized protein OS=Komagataella pastoris (strain GS115 / ATCC 20864) GN=PAS_chr2-1_0737 PE=4 SV=1
Protein component of the large (60S) ribosomal subunit OS=Komagataella pastoris (strain GS115 / ATCC 20864) GN=PAS_chr4_0139 PE=3 SV=1
Subunit of the Hat1p-Hat2p histone acetyltransferase complex OS=Komagataella pastoris (strain GS115 / ATCC 20864) GN=PAS_chr2-1_0205 PE=4 SV=1
Protein component of the small (40S) ribosomal subunit OS=Komagataella pastoris (strain GS115 / ATCC 20864) GN=PAS_chr1-4_0353 PE=4 SV=1
Rab escort protein, forms a complex with the Ras-like small GTPase Ypt1p OS=Komagataella pastoris (strain GS115 / ATCC 20864) GN=PAS_chr3_0586 PE=4 SV=1
Putative uncharacterized protein OS=Komagataella pastoris (strain GS115 / ATCC 20864) GN=PAS_c131_0011 PE=4 SV=1
Vacuolar sorting protein OS=Komagataella pastoris (strain GS115 / ATCC 20864) GN=PAS_chr1-1_0034 PE=4 SV=1
Palmitoylated, plasma membrane-bound casein kinase I isoform OS=Komagataella pastoris (strain GS115 / ATCC 20864) GN=PAS_chr4_0568 PE=4 SV=1
TFIID subunit (48 kDa) OS=Komagataella pastoris (strain GS115 / ATCC 20864) GN=PAS_chr3_0267 PE=4 SV=1
High affinity methionine permease OS=Komagataella pastoris (strain GS115 / ATCC 20864) GN=PAS_chr2-1_0351 PE=4 SV=1
Putative uncharacterized protein OS=Komagataella pastoris (strain GS115 / ATCC 20864) GN=PAS_chr1-4_0100 PE=4 SV=1
Putative uncharacterized protein OS=Komagataella pastoris (strain GS115 / ATCC 20864) GN=PAS_chr1-4_0344 PE=4 SV=1
Phosphoinositide PI4,5P(2) binding protein, forms a complex with Slm2p OS=Komagataella pastoris (strain GS115 / ATCC 20864) GN=PAS_chr1-4_0418 PE=4 SV=1
Phosphoglucomutase OS=Komagataella pastoris (strain GS115 / ATCC 20864) GN=PAS_chr1-4_0264 PE=3 SV=1
Upstream serine/threonine kinase for the SNF1 complex OS=Komagataella pastoris (strain GS115 / ATCC 20864) GN=PAS_chr2-1_0639 PE=4 SV=1
GTP/GDP exchange factor for Rsr1p (Bud1p) required for both axial and bipolar budding patterns OS=Komagataella pastoris (strain GS115 / ATCC 20864) GN=PAS_chr3_0660 PE=4 SV=1
Putative uncharacterized protein OS=Komagataella pastoris (strain GS115 / ATCC 20864) GN=PAS_chr1-1_0320 PE=4 SV=1
Cytoplasmic aspartyl-tRNA synthetase, homodimeric enzyme OS=Komagataella pastoris (strain GS115 / ATCC 20864) GN=PAS_chr1-4_0095 PE=3 SV=1
Pyruvate kinase OS=Komagataella pastoris (strain GS115 / ATCC 20864) GN=PAS_chr2-1_0769 PE=3 SV=1
GTPase-activating protein OS=Komagataella pastoris (strain GS115 / ATCC 20864) GN=PAS_FragB_0038 PE=4 SV=1
Protein component of the small (40S) ribosomal subunit OS=Komagataella pastoris (strain GS115 / ATCC 20864) GN=PAS_chr3_0762 PE=3 SV=1
Ceramide synthase component, involved in synthesis of ceramide OS=Komagataella pastoris (strain GS115 / ATCC 20864) GN=PAS_chr1-1_0358 PE=4 SV=1
Glucose-6-phosphate 1-dehydrogenase OS=Komagataella pastoris (strain GS115 / ATCC 20864) GN=PAS_chr2-1_0308 PE=3 SV=1
Member of the imitation-switch (ISWI) class of ATP-dependent chromatin remodeling complexes OS=Komagataella pastoris (strain GS115 / ATCC 20864) GN=PAS_chr4_0128 PE=4 SV=1
Putative uncharacterized protein OS=Komagataella pastoris (strain GS115 / ATCC 20864) GN=PAS_chr1-1_0129 PE=4 SV=1
Protein component of the large (60S) ribosomal subunit OS=Komagataella pastoris (strain GS115 / ATCC 20864) GN=PAS_chr4_0131 PE=4 SV=1
Glycogen synthase, similar to Gsy1p OS=Komagataella pastoris (strain GS115 / ATCC 20864) GN=PAS_chr3_0781 PE=4 SV=1
One of two type I myosins OS=Komagataella pastoris (strain GS115 / ATCC 20864) GN=PAS_chr4_0618 PE=4 SV=1
Pleckstrin homology domain containing protein proposed to function as a glycerol channel activator OS=Komagataella pastoris (strain GS115 / ATCC 20864) GN=PAS_chr2-1_0479 PE=4 SV=1
Essential RNA-binding G protein effector of mating response pathway OS=Komagataella pastoris (strain GS115 / ATCC 20864) GN=PAS_chr1-3_0045 PE=4 SV=1
Transcriptional repressor and activator OS=Komagataella pastoris (strain GS115 / ATCC 20864) GN=PAS_chr3_0115 PE=3 SV=1
Putative uncharacterized protein OS=Komagataella pastoris (strain GS115 / ATCC 20864) GN=PAS_chr2-2_0468 PE=4 SV=1
Essential protein required for determination of budding pattern OS=Komagataella pastoris (strain GS115 / ATCC 20864) GN=PAS_chr1-4_0128 PE=4 SV=1
MAP kinase kinase kinase of the HOG1 mitogen-activated signaling pathway OS=Komagataella pastoris (strain GS115 / ATCC 20864) GN=PAS_chr1-4_0279 PE=4 SV=1
Sterol 3-beta-glucosyltransferase OS=Komagataella pastoris (strain GS115 / ATCC 20864) GN=ATG26 PE=3 SV=1
Translation initiation factor eIF-4B, has RNA annealing activity OS=Komagataella pastoris (strain GS115 / ATCC 20864) GN=PAS_chr3_1054 PE=4 SV=1
Polyphosphatidylinositol phosphatase, dephosphorylates multiple phosphatidylinositols OS=Komagataella pastoris (strain GS115 / ATCC 20864) GN=PAS_chr2-1_0178 PE=4 SV=1
Putative uncharacterized protein OS=Komagataella pastoris (strain GS115 / ATCC 20864) GN=PAS_chr3_1034 PE=4 SV=1
Uncharacterized protein OS=Komagataella pastoris (strain GS115 / ATCC 20864) GN=PAS_chr4_0176 PE=4 SV=1
Cytoplasmic protein required for replication of Brome mosaic virus in S. cerevisiae OS=Komagataella pastoris (strain GS115 / ATCC 20864) GN=PAS_chr3_0682 PE=4 SV=1
Putative uncharacterized protein OS=Komagataella pastoris (strain GS115 / ATCC 20864) GN=PAS_chr1-3_0179 PE=4 SV=1
Putative uncharacterized protein OS=Komagataella pastoris (strain GS115 / ATCC 20864) GN=PAS_chr3_0383 PE=4 SV=1
MAP kinase kinase that plays a pivotal role in the osmosensing signal-transduction pathway OS=Komagataella pastoris (strain GS115 / ATCC 20864) GN=PAS_chr1-1_0105 PE=4 SV=1
Rho GTPase activating protein (RhoGAP) involved in control of the cytoskeleton organization OS=Komagataella pastoris (strain GS115 / ATCC 20864) GN=PAS_chr1-4_0424 PE=4 SV=1
Minor isoform of tropomyosin, binds to and stabilizes actin cables and filaments OS=Komagataella pastoris (strain GS115 / ATCC 20864) GN=PAS_chr4_0115 PE=4 SV=1
Uncharacterized protein OS=Komagataella pastoris (strain GS115 / ATCC 20864) GN=PAS_chr4_0986 PE=3 SV=1
Primary rRNA-binding ribosomal protein component of the large (60S) ribosomal subunit OS=Komagataella pastoris (strain GS115 / ATCC 20864) GN=PAS_chr4_0814 PE=3 SV=1
Uncharacterized protein OS=Komagataella pastoris (strain GS115 / ATCC 20864) GN=PAS_chr4_0948 PE=4 SV=1
Histone acetyltransferase catalytic subunit of NuA3 complex that acetylates histone H3, involved in OS=Komagataella pastoris (strain GS115 / ATCC 20864) GN=PAS_chr2-2_0213 PE=4 SV=1
Putative uncharacterized protein OS=Komagataella pastoris (strain GS115 / ATCC 20864) GN=PAS_chr2-1_0566 PE=4 SV=1
Clathrin light chain OS=Komagataella pastoris (strain GS115 / ATCC 20864) GN=PAS_chr1-4_0158 PE=4 SV=1
Putative uncharacterized protein OS=Komagataella pastoris (strain GS115 / ATCC 20864) GN=PAS_chr3_1017 PE=4 SV=1
Transporter of thiamine or related compound OS=Komagataella pastoris (strain GS115 / ATCC 20864) GN=PAS_chr3_0649 PE=4 SV=1
Uncharacterized protein OS=Komagataella pastoris (strain GS115 / ATCC 20864) GN=PAS_chr4_0635 PE=4 SV=1
Putative uncharacterized protein OS=Komagataella pastoris (strain GS115 / ATCC 20864) GN=PAS_chr2-2_0177 PE=4 SV=1
Putative uncharacterized protein OS=Komagataella pastoris (strain GS115 / ATCC 20864) GN=PAS_chr1-3_0165 PE=4 SV=1
Endosomal protein that regulates cell polarity, controls polarized growth OS=Komagataella pastoris (strain GS115 / ATCC 20864) GN=PAS_chr4_0430 PE=4 SV=1
Putative uncharacterized protein OS=Komagataella pastoris (strain GS115 / ATCC 20864) GN=PAS_chr2-1_0288 PE=4 SV=1
Small subunit of the ribonucleotide-diphosphate reductase (RNR) complex OS=Komagataella pastoris (strain GS115 / ATCC 20864) GN=PAS_chr4_0197 PE=4 SV=1
Regulatory, non-ATPase subunit of the 26S proteasome OS=Komagataella pastoris (strain GS115 / ATCC 20864) GN=PAS_chr1-4_0478 PE=4 SV=1
Transmembrane actin-binding protein involved in membrane cytoskeleton assembly and cell polarization OS=Komagataella pastoris (strain GS115 / ATCC 20864) GN=PAS_chr4_0879 PE=4 SV=1
Putative transcription factor OS=Komagataella pastoris (strain GS115 / ATCC 20864) GN=PAS_FragB_0066 PE=4 SV=1
Cytoplasmic inorganic pyrophosphatase (PPase) OS=Komagataella pastoris (strain GS115 / ATCC 20864) GN=PAS_chr1-3_0028 PE=4 SV=1
Peptidyl-prolyl isomerase OS=Komagataella pastoris (strain GS115 / ATCC 20864) GN=PAS_c034_0039 PE=3 SV=1
Putative uncharacterized protein OS=Komagataella pastoris (strain GS115 / ATCC 20864) GN=PAS_c121_0004 PE=4 SV=1
Transcription factor (BHLH) involved in interorganelle communication OS=Komagataella pastoris (strain GS115 / ATCC 20864) GN=PAS_chr1-1_0371 PE=4 SV=1
Regulatory subunit of type 1 protein phosphatase Glc7p OS=Komagataella pastoris (strain GS115 / ATCC 20864) GN=PAS_chr1-1_0078 PE=4 SV=1
Putative uncharacterized protein OS=Komagataella pastoris (strain GS115 / ATCC 20864) GN=PAS_chr1-4_0402 PE=4 SV=1
Uncharacterized protein OS=Komagataella pastoris (strain GS115 / ATCC 20864) GN=PAS_chr4_0977 PE=4 SV=1
Component of the CCR4-NOT complex, which has multiple roles in regulating mRNA levels OS=Komagataella pastoris (strain GS115 / ATCC 20864) GN=PAS_chr4_0431 PE=4 SV=1
Putative uncharacterized protein OS=Komagataella pastoris (strain GS115 / ATCC 20864) GN=PAS_chr2-1_0008 PE=4 SV=1
Putative uncharacterized protein OS=Komagataella pastoris (strain GS115 / ATCC 20864) GN=PAS_chr1-4_0155 PE=4 SV=1
Putative uncharacterized protein OS=Komagataella pastoris (strain GS115 / ATCC 20864) GN=PAS_chr2-1_0809 PE=3 SV=1
Putative uncharacterized protein OS=Komagataella pastoris (strain GS115 / ATCC 20864) GN=PAS_c131_0004 PE=4 SV=1
ATP-dependent RNA helicase OS=Komagataella pastoris (strain GS115 / ATCC 20864) GN=PAS_chr1-1_0061 PE=4 SV=1
Putative uncharacterized protein OS=Komagataella pastoris (strain GS115 / ATCC 20864) GN=PAS_chr3_0514 PE=4 SV=1
Protein involved in clathrin cage assembly OS=Komagataella pastoris (strain GS115 / ATCC 20864) GN=PAS_chr2-2_0405 PE=4 SV=1
PIK-related protein kinase and rapamycin target OS=Komagataella pastoris (strain GS115 / ATCC 20864) GN=PAS_chr2-1_0557 PE=4 SV=1
Ran GTPase binding protein OS=Komagataella pastoris (strain GS115 / ATCC 20864) GN=PAS_chr4_0817 PE=4 SV=1
Saccharopine dehydrogenase [NAD(+), L-lysine-forming] OS=Komagataella pastoris (strain GS115 / ATCC 20864) GN=PAS_chr1-1_0447 PE=3 SV=1
Putative uncharacterized protein OS=Komagataella pastoris (strain GS115 / ATCC 20864) GN=PAS_chr1-1_0351 PE=4 SV=1
Peroxisomal membrane peroxin that is a central component of the peroxisomal protein import machinery OS=Komagataella pastoris (strain GS115 / ATCC 20864) GN=PAS_chr4_0794 PE=4 SV=1
Putative uncharacterized protein OS=Komagataella pastoris (strain GS115 / ATCC 20864) GN=PAS_chr1-1_0402 PE=4 SV=1
Cytoplasmic tyrosyl-tRNA synthetase, class I aminoacyl-tRNA synthetase OS=Komagataella pastoris (strain GS115 / ATCC 20864) GN=PAS_chr4_0522 PE=4 SV=1
Plasma membrane protein that may be involved in osmotolerance OS=Komagataella pastoris (strain GS115 / ATCC 20864) GN=PAS_chr2-1_0501 PE=4 SV=1
Protein component of the large (60S) ribosomal subunit OS=Komagataella pastoris (strain GS115 / ATCC 20864) GN=PAS_chr4_0267 PE=3 SV=1
Putative uncharacterized protein OS=Komagataella pastoris (strain GS115 / ATCC 20864) GN=PAS_chr1-1_0260 PE=4 SV=1
Nucleolar protein OS=Komagataella pastoris (strain GS115 / ATCC 20864) GN=PAS_chr3_0212 PE=4 SV=1
Chorismate mutase, catalyzes the conversion of chorismate to prephenate OS=Komagataella pastoris (strain GS115 / ATCC 20864) GN=PAS_chr4_0050 PE=4 SV=1
Inositol hexakisphosphate and inositol heptakisphosphate kinase OS=Komagataella pastoris (strain GS115 / ATCC 20864) GN=PAS_chr1-1_0005 PE=4 SV=1
Putative transcription factor OS=Komagataella pastoris (strain GS115 / ATCC 20864) GN=PAS_chr1-4_0516 PE=4 SV=1
Putative uncharacterized protein OS=Komagataella pastoris (strain GS115 / ATCC 20864) GN=PAS_chr2-2_0120 PE=4 SV=1
Putative uncharacterized protein OS=Komagataella pastoris (strain GS115 / ATCC 20864) GN=PAS_chr3_1258 PE=4 SV=1
Putative uncharacterized protein OS=Komagataella pastoris (strain GS115 / ATCC 20864) GN=PAS_chr1-4_0290 PE=4 SV=1
Protein kinase of the PAK/Ste20 kinase family OS=Komagataella pastoris (strain GS115 / ATCC 20864) GN=PAS_chr3_0791 PE=4 SV=1
Putative uncharacterized protein OS=Komagataella pastoris (strain GS115 / ATCC 20864) GN=PAS_chr2-1_0871 PE=4 SV=1
Lipid-binding protein, localized to the bud via specific mRNA transport OS=Komagataella pastoris (strain GS115 / ATCC 20864) GN=PAS_chr1-1_0120 PE=4 SV=1
Polyamine transport protein, recognizes spermine, putrescine, and spermidine OS=Komagataella pastoris (strain GS115 / ATCC 20864) GN=PAS_chr4_0836 PE=4 SV=1
Adenylyl cyclase-associated protein OS=Komagataella pastoris (strain GS115 / ATCC 20864) GN=PAS_chr2-2_0067 PE=3 SV=1
Putative uncharacterized protein OS=Komagataella pastoris (strain GS115 / ATCC 20864) GN=PAS_chr1-1_0265 PE=4 SV=1
Nicotinic acid mononucleotide adenylyltransferase, involved in pathways of NAD biosynthesis OS=Komagataella pastoris (strain GS115 / ATCC 20864) GN=PAS_chr1-4_0181 PE=4 SV=1
G-protein beta subunit and guanine nucleotide dissociation inhibitor for Gpa2p OS=Komagataella pastoris (strain GS115 / ATCC 20864) GN=PAS_chr1-4_0063 PE=4 SV=1
Phosphatidylinositol 4-kinase OS=Komagataella pastoris (strain GS115 / ATCC 20864) GN=PAS_chr1-4_0380 PE=4 SV=1
40S small ribosomal subunit OS=Komagataella pastoris (strain GS115 / ATCC 20864) GN=PAS_chr1-4_0422 PE=3 SV=1
Putative uncharacterized protein OS=Komagataella pastoris (strain GS115 / ATCC 20864) GN=PAS_chr3_0416 PE=4 SV=1
Putative uncharacterized protein OS=Komagataella pastoris (strain GS115 / ATCC 20864) GN=PAS_chr2-1_0742 PE=4 SV=1
Protein chaperone involved in regulation of the HSP90 and HSP70 functions OS=Komagataella pastoris (strain GS115 / ATCC 20864) GN=PAS_chr2-2_0066 PE=3 SV=1
ATPase component of the RSC chromatin remodeling complex OS=Komagataella pastoris (strain GS115 / ATCC 20864) GN=PAS_chr2-2_0128 PE=4 SV=1
Putative uncharacterized protein OS=Komagataella pastoris (strain GS115 / ATCC 20864) GN=PAS_chr3_0772 PE=4 SV=1
Vacuolar membrane protein involved in vacuolar polyphosphate accumulation OS=Komagataella pastoris (strain GS115 / ATCC 20864) GN=PAS_chr2-1_0668 PE=4 SV=1
Protein involved in positive regulation of both 1,3-beta-glucan synthesis and the Pkc1p-MAPK pathway OS=Komagataella pastoris (strain GS115 / ATCC 20864) GN=PAS_chr3_0560 PE=4 SV=1
Protein involved in programmed cell death OS=Komagataella pastoris (strain GS115 / ATCC 20864) GN=PAS_chr1-1_0091 PE=4 SV=1
Uncharacterized protein OS=Komagataella pastoris (strain GS115 / ATCC 20864) GN=PAS_chr4_0773 PE=4 SV=1
Ser-Thr protein kinase, member (With Ark1p and Prk1p) of the Ark kinase family OS=Komagataella pastoris (strain GS115 / ATCC 20864) GN=PAS_chr3_0940 PE=4 SV=1
Uncharacterized protein OS=Komagataella pastoris (strain GS115 / ATCC 20864) GN=PAS_chr4_0320 PE=4 SV=1
Ubiquitin carboxyl-terminal hydrolase OS=Komagataella pastoris (strain GS115 / ATCC 20864) GN=PAS_chr1-1_0435 PE=3 SV=1
Protein kinase implicated in activation of the plasma membrane H(+)-ATPase Pma1p OS=Komagataella pastoris (strain GS115 / ATCC 20864) GN=PAS_chr3_1091 PE=4 SV=1
Phosphatidylinositol transfer protein OS=Komagataella pastoris (strain GS115 / ATCC 20864) GN=PAS_chr1-4_0532 PE=4 SV=1
Acetyl-CoA carboxylase, biotin containing enzyme OS=Komagataella pastoris (strain GS115 / ATCC 20864) GN=PAS_chr1-4_0249 PE=4 SV=1
Protein that localizes to the nucleus and is involved in transcription regulation OS=Komagataella pastoris (strain GS115 / ATCC 20864) GN=PAS_chr3_1109 PE=4 SV=1
Member of an oxysterol-binding protein family with seven members in S. cerevisiae OS=Komagataella pastoris (strain GS115 / ATCC 20864) GN=PAS_chr3_0421 PE=4 SV=1
Uncharacterized protein OS=Komagataella pastoris (strain GS115 / ATCC 20864) GN=PAS_chr4_0616 PE=4 SV=1
Putative uncharacterized protein OS=Komagataella pastoris (strain GS115 / ATCC 20864) GN=PAS_chr1-4_0137 PE=4 SV=1
Phosphotyrosine-specific protein phosphatase involved in the inactivation of mitogen-activated prote OS=Komagataella pastoris (strain GS115 / ATCC 20864) GN=PAS_chr2-1_0203 PE=4 SV=1
Protein whose overexpression affects chromosome stability, potential Cdc28p substrate OS=Komagataella pastoris (strain GS115 / ATCC 20864) GN=PAS_chr1-1_0238 PE=4 SV=1
Nuclear pore complex subunit, part of a subcomplex also containing Nup53p, Nup170p, and Pse1p OS=Komagataella pastoris (strain GS115 / ATCC 20864) GN=PAS_chr4_0657 PE=4 SV=1
Cytochrome b-c1 complex subunit 7 OS=Komagataella pastoris (strain GS115 / ATCC 20864) GN=PAS_chr1-1_0322 PE=3 SV=1
Protein with a potential role in actin cytoskeletal organization OS=Komagataella pastoris (strain GS115 / ATCC 20864) GN=PAS_chr3_0865 PE=4 SV=1
Trimethyl guanosine synthase, conserved nucleolar methyl transferase OS=Komagataella pastoris (strain GS115 / ATCC 20864) GN=PAS_chr4_0090 PE=4 SV=1
Polyamine transport protein specific for spermine OS=Komagataella pastoris (strain GS115 / ATCC 20864) GN=PAS_chr1-4_0090 PE=4 SV=1
Reticulon-like protein OS=Komagataella pastoris (strain GS115 / ATCC 20864) GN=PAS_chr1-3_0230 PE=4 SV=1
Protein kinase required for signal transduction during entry into meiosis OS=Komagataella pastoris (strain GS115 / ATCC 20864) GN=PAS_chr1-4_0368 PE=4 SV=1
Uncharacterized protein OS=Komagataella pastoris (strain GS115 / ATCC 20864) GN=PAS_chr4_0462 PE=4 SV=1
Putative uncharacterized protein OS=Komagataella pastoris (strain GS115 / ATCC 20864) GN=PAS_chr3_1226 PE=4 SV=1
ER membrane protein involved in a late step of glycosylphosphatidylinositol (GPI) anchor assembly OS=Komagataella pastoris (strain GS115 / ATCC 20864) GN=PAS_chr4_0652 PE=4 SV=1
Vacuolar protein sorting-associated protein 27 OS=Komagataella pastoris (strain GS115 / ATCC 20864) GN=PAS_FragB_0049 PE=4 SV=1
Putative uncharacterized protein OS=Komagataella pastoris (strain GS115 / ATCC 20864) GN=PAS_chr1-1_0266 PE=4 SV=1
Protein implicated in polar growth, functionally redundant with Boi1p OS=Komagataella pastoris (strain GS115 / ATCC 20864) GN=PAS_chr1-3_0147 PE=4 SV=1
6-phosphogluconate dehydrogenase, decarboxylating OS=Komagataella pastoris (strain GS115 / ATCC 20864) GN=PAS_chr3_0277 PE=3 SV=1
Cystathionine beta-synthase, catalyzes the synthesis of cystathionine from serine and homocysteine OS=Komagataella pastoris (strain GS115 / ATCC 20864) GN=PAS_chr2-2_0137 PE=4 SV=1
Component of the septin ring of the mother-bud neck that is required for cytokinesis OS=Komagataella pastoris (strain GS115 / ATCC 20864) GN=PAS_chr3_0967 PE=3 SV=1
Deletion suppressor of mpt5 mutation OS=Komagataella pastoris (strain GS115 / ATCC 20864) GN=PAS_chr2-1_0491 PE=4 SV=1
Putative uncharacterized protein OS=Komagataella pastoris (strain GS115 / ATCC 20864) GN=PAS_chr2-1_0253 PE=4 SV=1
Putative uncharacterized protein OS=Komagataella pastoris (strain GS115 / ATCC 20864) GN=PAS_chr3_0258 PE=4 SV=1
Nucleolar protein, component of the small subunit (SSU) processome containing the U3 snoRNA OS=Komagataella pastoris (strain GS115 / ATCC 20864) GN=PAS_chr4_0667 PE=4 SV=1
Protein with an N-terminal kelch-like domain OS=Komagataella pastoris (strain GS115 / ATCC 20864) GN=PAS_chr4_0325 PE=4 SV=1
Protein kinase OS=Komagataella pastoris (strain GS115 / ATCC 20864) GN=PAS_chr4_0404 PE=4 SV=1
Putative uncharacterized protein OS=Komagataella pastoris (strain GS115 / ATCC 20864) GN=PAS_chr1-3_0169 PE=4 SV=1
Putative uncharacterized protein OS=Komagataella pastoris (strain GS115 / ATCC 20864) GN=PAS_chr3_0837 PE=4 SV=1
Alkaline phosphatase OS=Komagataella pastoris (strain GS115 / ATCC 20864) GN=PAS_chr2-2_0084 PE=3 SV=1
Uncharacterized protein OS=Komagataella pastoris (strain GS115 / ATCC 20864) GN=PAS_chr4_0024 PE=4 SV=1
Ribosomal protein 59 of small subunit, required for ribosome assembly and 20S pre-rRNA processing OS=Komagataella pastoris (strain GS115 / ATCC 20864) GN=PAS_chr2-1_0481 PE=3 SV=1
Mg&lt;sup&gt2+&lt;/sup&gt-dependent phosphatidate (PA) phosphatase OS=Komagataella pastoris (strain GS115 / ATCC 20864) GN=PAS_chr3_0512 PE=4 SV=1
Putative uncharacterized protein OS=Komagataella pastoris (strain GS115 / ATCC 20864) GN=PAS_c121_0008 PE=4 SV=1
Urea amidolyase, contains both urea carboxylase and allophanate hydrolase activities OS=Komagataella pastoris (strain GS115 / ATCC 20864) GN=PAS_chr4_0173 PE=4 SV=1
Putative ATP-dependent RNA helicase, nucleolar protein OS=Komagataella pastoris (strain GS115 / ATCC 20864) GN=PAS_chr1-3_0272 PE=4 SV=1
Part of actin cytoskeleton-regulatory complex Pan1p-Sla1p-End3p OS=Komagataella pastoris (strain GS115 / ATCC 20864) GN=PAS_chr3_0694 PE=4 SV=1
Putative uncharacterized protein OS=Komagataella pastoris (strain GS115 / ATCC 20864) GN=PAS_chr2-1_0218 PE=4 SV=1
Plasma membrane ATP binding cassette (ABC) transporter OS=Komagataella pastoris (strain GS115 / ATCC 20864) GN=PAS_chr1-1_0398 PE=3 SV=1
40S ribosomal protein S8 OS=Komagataella pastoris (strain GS115 / ATCC 20864) GN=PAS_chr1-1_0439 PE=3 SV=1
Tyrosine phosphatase that plays a role in actin filament organization and endocytosis OS=Komagataella pastoris (strain GS115 / ATCC 20864) GN=PAS_chr2-2_0197 PE=4 SV=1
Putative uncharacterized protein OS=Komagataella pastoris (strain GS115 / ATCC 20864) GN=PAS_chr2-1_0444 PE=4 SV=1
Protein kinase OS=Komagataella pastoris (strain GS115 / ATCC 20864) GN=PAS_chr1-3_0106 PE=4 SV=1
UDP-glucose pyrophosphorylase (UGPase), catalyses the reversible formation of UDP-Glc OS=Komagataella pastoris (strain GS115 / ATCC 20864) GN=PAS_chr1-3_0122 PE=4 SV=1
Putative uncharacterized protein OS=Komagataella pastoris (strain GS115 / ATCC 20864) GN=PAS_chr2-2_0231 PE=4 SV=1
Oxysterol-binding protein OS=Komagataella pastoris (strain GS115 / ATCC 20864) GN=PAS_chr1-4_0646 PE=3 SV=1
Heat shock protein OS=Komagataella pastoris (strain GS115 / ATCC 20864) GN=PAS_c034_0029 PE=3 SV=1
Negative regulatory subunit of the protein phosphatase 1 Ppz1p OS=Komagataella pastoris (strain GS115 / ATCC 20864) GN=PAS_chr3_1031 PE=4 SV=1
Activator of Chs3p (Chitin synthase III), recruits Chs3p to the bud neck via interaction with Bni4p OS=Komagataella pastoris (strain GS115 / ATCC 20864) GN=PAS_chr2-1_0261 PE=4 SV=1
Putative uncharacterized protein OS=Komagataella pastoris (strain GS115 / ATCC 20864) GN=PAS_chr2-1_0432 PE=4 SV=1
Putative uncharacterized protein OS=Komagataella pastoris (strain GS115 / ATCC 20864) GN=PAS_chr3_1254 PE=4 SV=1
Putative uncharacterized protein OS=Komagataella pastoris (strain GS115 / ATCC 20864) GN=PAS_chr3_1141 PE=4 SV=1
Vacuolar protein sorting protein OS=Komagataella pastoris (strain GS115 / ATCC 20864) GN=PAS_chr1-4_0657 PE=4 SV=1
Putative transcription factor containing a zinc finger OS=Komagataella pastoris (strain GS115 / ATCC 20864) GN=PAS_chr3_0407 PE=4 SV=1
Putative uncharacterized protein OS=Komagataella pastoris (strain GS115 / ATCC 20864) GN=PAS_chr2-1_0132 PE=4 SV=1
Autophagy-related protein 3 OS=Komagataella pastoris (strain GS115 / ATCC 20864) GN=PAS_chr3_0688 PE=3 SV=1
Putative uncharacterized protein OS=Komagataella pastoris (strain GS115 / ATCC 20864) GN=PAS_chr1-3_0046 PE=4 SV=1
Component of the U2 snRNP OS=Komagataella pastoris (strain GS115 / ATCC 20864) GN=PAS_chr1-1_0065 PE=4 SV=1
Putative uncharacterized protein OS=Komagataella pastoris (strain GS115 / ATCC 20864) GN=PAS_chr2-1_0827 PE=4 SV=1
Member of a stationary phase-induced gene family OS=Komagataella pastoris (strain GS115 / ATCC 20864) GN=PAS_chr1-4_0393 PE=3 SV=1
Putative uncharacterized protein OS=Komagataella pastoris (strain GS115 / ATCC 20864) GN=PAS_chr3_0802 PE=4 SV=1
Glycerol proton symporter of the plasma membrane, subject to glucose-induced inactivation OS=Komagataella pastoris (strain GS115 / ATCC 20864) GN=PAS_chr3_1099 PE=3 SV=1
Putative uncharacterized protein OS=Komagataella pastoris (strain GS115 / ATCC 20864) GN=PAS_chr3_1038 PE=4 SV=1
Diacylglycerol kinase, localized to the endoplasmic reticulum (ER) OS=Komagataella pastoris (strain GS115 / ATCC 20864) GN=PAS_chr3_0072 PE=4 SV=1
Pyruvate carboxylase OS=Komagataella pastoris (strain GS115 / ATCC 20864) GN=PAS_chr2-2_0024 PE=3 SV=1
Subunit a of vacuolar-ATPase V0 domain, one of two isoforms (Vph1p and Stv1p) OS=Komagataella pastoris (strain GS115 / ATCC 20864) GN=PAS_chr1-3_0066 PE=4 SV=1
DNA polymerase OS=Komagataella pastoris (strain GS115 / ATCC 20864) GN=PAS_chr2-2_0349 PE=3 SV=1
Glucose-6-phosphate isomerase OS=Komagataella pastoris (strain GS115 / ATCC 20864) GN=PAS_chr3_0456 PE=3 SV=1
Putative uncharacterized protein OS=Komagataella pastoris (strain GS115 / ATCC 20864) GN=PAS_chr2-2_0463 PE=4 SV=1
Uncharacterized protein OS=Komagataella pastoris (strain GS115 / ATCC 20864) GN=PAS_chr4_0455 PE=4 SV=1
3-isopropylmalate dehydratase OS=Komagataella pastoris (strain GS115 / ATCC 20864) GN=PAS_chr2-1_0368 PE=3 SV=1
ATP-dependent RNA helicase of the SFI superfamily, required for nonsense mediated mRNA decay and for OS=Komagataella pastoris (strain GS115 / ATCC 20864) GN=PAS_chr3_0657 PE=4 SV=1
Uncharacterized protein OS=Komagataella pastoris (strain GS115 / ATCC 20864) GN=PAS_chr4_0851 PE=4 SV=1
N-terminally acetylated ribosomal protein L37 of the large (60S) ribosomal subunit OS=Komagataella pastoris (strain GS115 / ATCC 20864) GN=PAS_chr1-4_0275 PE=4 SV=1
Component of the polarisome OS=Komagataella pastoris (strain GS115 / ATCC 20864) GN=PAS_chr3_0816 PE=4 SV=1
Putative uncharacterized protein OS=Komagataella pastoris (strain GS115 / ATCC 20864) GN=PAS_FragB_0073 PE=4 SV=1
Neutral trehalase, degrades trehalose OS=Komagataella pastoris (strain GS115 / ATCC 20864) GN=PAS_chr4_0816 PE=4 SV=1
Malate dehydrogenase OS=Komagataella pastoris (strain GS115 / ATCC 20864) GN=PAS_chr2-1_0238 PE=1 SV=1
Putative uncharacterized protein OS=Komagataella pastoris (strain GS115 / ATCC 20864) GN=PAS_chr2-2_0397 PE=4 SV=1
Putative uncharacterized protein OS=Komagataella pastoris (strain GS115 / ATCC 20864) GN=PAS_chr3_1023 PE=4 SV=1
Uncharacterized protein OS=Komagataella pastoris (strain GS115 / ATCC 20864) GN=PAS_chr4_0126 PE=4 SV=1
Uncharacterized protein OS=Komagataella pastoris (strain GS115 / ATCC 20864) GN=PAS_chr4_0989 PE=4 SV=1
Subunit of the Hat1p-Hat2p histone acetyltransferase complex OS=Komagataella pastoris (strain GS115 / ATCC 20864) GN=PAS_chr2-1_0271 PE=4 SV=1
Protein involved in the HOG (High osmolarity glycerol) pathway OS=Komagataella pastoris (strain GS115 / ATCC 20864) GN=PAS_chr1-3_0267 PE=4 SV=1
Putative uncharacterized protein OS=Komagataella pastoris (strain GS115 / ATCC 20864) GN=PAS_chr3_1009 PE=4 SV=1
Carnitine acetyltransferase OS=Komagataella pastoris (strain GS115 / ATCC 20864) GN=PAS_chr3_0761 PE=3 SV=1
Component of a complex containing the Tor2p kinase and other proteins, which may have a role in regu OS=Komagataella pastoris (strain GS115 / ATCC 20864) GN=PAS_chr2-1_0241 PE=4 SV=1
Golgi matrix protein involved in the structural organization of the cis-Golgi OS=Komagataella pastoris (strain GS115 / ATCC 20864) GN=PAS_chr1-4_0268 PE=4 SV=1
Lysine--tRNA ligase OS=Komagataella pastoris (strain GS115 / ATCC 20864) GN=PAS_chr3_0949 PE=3 SV=1
Actin-and formin-interacting protein, involved in actin cable nucleation and polarized cell growth OS=Komagataella pastoris (strain GS115 / ATCC 20864) GN=PAS_chr2-1_0372 PE=4 SV=1
Serine/threonine protein kinase involved in regulation of exocytosis OS=Komagataella pastoris (strain GS115 / ATCC 20864) GN=PAS_chr3_0347 PE=4 SV=1
Uncharacterized protein OS=Komagataella pastoris (strain GS115 / ATCC 20864) GN=PAS_chr4_0410 PE=4 SV=1
Putative uncharacterized protein OS=Komagataella pastoris (strain GS115 / ATCC 20864) GN=PAS_chr2-1_0531 PE=4 SV=1
Putative uncharacterized protein OS=Komagataella pastoris (strain GS115 / ATCC 20864) GN=PAS_chr3_0666 PE=4 SV=1
Putative uncharacterized protein OS=Komagataella pastoris (strain GS115 / ATCC 20864) GN=PAS_chr1-4_0140 PE=4 SV=1
Basic leucine zipper (BZIP) transcription factor required for oxidative stress tolerance OS=Komagataella pastoris (strain GS115 / ATCC 20864) GN=PAS_chr4_0601 PE=4 SV=1
Putative uncharacterized protein OS=Komagataella pastoris (strain GS115 / ATCC 20864) GN=PAS_chr3_0504 PE=4 SV=1
Essential component of the nuclear pore complex OS=Komagataella pastoris (strain GS115 / ATCC 20864) GN=PAS_chr3_0524 PE=4 SV=1
Conserved ribosomal protein P0 similar to rat P0, human P0, and E. coli L10e OS=Komagataella pastoris (strain GS115 / ATCC 20864) GN=PAS_chr1-3_0068 PE=3 SV=1
E1 alpha subunit of the pyruvate dehydrogenase (PDH) complex OS=Komagataella pastoris (strain GS115 / ATCC 20864) GN=PAS_chr2-2_0294 PE=4 SV=1
Putative uncharacterized protein OS=Komagataella pastoris (strain GS115 / ATCC 20864) GN=PAS_chr2-2_0419 PE=4 SV=1
Putative uncharacterized protein OS=Komagataella pastoris (strain GS115 / ATCC 20864) GN=PAS_chr1-4_0667 PE=4 SV=1
Subunit beta1 of the nascent polypeptide-associated complex (NAC) involved in protein targeting OS=Komagataella pastoris (strain GS115 / ATCC 20864) GN=PAS_chr1-3_0172 PE=4 SV=1
Alpha 1,3 glucosyltransferase OS=Komagataella pastoris (strain GS115 / ATCC 20864) GN=PAS_chr2-1_0549 PE=4 SV=1
Putative uncharacterized protein OS=Komagataella pastoris (strain GS115 / ATCC 20864) GN=PAS_FragB_0072 PE=4 SV=1
Essential N-acetylglucosamine-phosphate mutase OS=Komagataella pastoris (strain GS115 / ATCC 20864) GN=PAS_chr1-1_0067 PE=3 SV=1
P-type ATPase sodium pump, involved in Na+ and Li+ efflux to allow salt tolerance OS=Komagataella pastoris (strain GS115 / ATCC 20864) GN=PAS_chr1-1_0428 PE=3 SV=1
Membrane bound guanine nucleotide exchange factor (GEF or GDP-release factor) OS=Komagataella pastoris (strain GS115 / ATCC 20864) GN=PAS_chr1-4_0107 PE=4 SV=1
Type II myosin heavy chain, required for wild-type cytokinesis and cell separation OS=Komagataella pastoris (strain GS115 / ATCC 20864) GN=PAS_chr3_0823 PE=4 SV=1
Alpha subunit of fatty acid synthetase OS=Komagataella pastoris (strain GS115 / ATCC 20864) GN=PAS_chr1-4_0295 PE=3 SV=1
Myo-inositol transporter with strong similarity to the major myo-inositol transporter Itr1p OS=Komagataella pastoris (strain GS115 / ATCC 20864) GN=PAS_chr2-1_0489 PE=3 SV=1
Putative uncharacterized protein OS=Komagataella pastoris (strain GS115 / ATCC 20864) GN=PAS_chr1-1_0500 PE=4 SV=1
Subunit of the RAVE complex (Rav1p, Rav2p, Skp1p), which promotes assembly of the V-ATPase holoenzym OS=Komagataella pastoris (strain GS115 / ATCC 20864) GN=PAS_chr2-1_0345 PE=4 SV=1
Member of the PAK family of serine/threonine protein kinases with similarity to Ste20p and Cla4p OS=Komagataella pastoris (strain GS115 / ATCC 20864) GN=PAS_chr4_0313 PE=4 SV=1
GTPase-activating protein (RhoGAP) for Rho3p and Rho4p OS=Komagataella pastoris (strain GS115 / ATCC 20864) GN=PAS_chr4_0681 PE=4 SV=1
Calmodulin OS=Komagataella pastoris (strain GS115 / ATCC 20864) GN=PAS_chr2-1_0758 PE=4 SV=1
Myosin-2 OS=Komagataella pastoris (strain GS115 / ATCC 20864) GN=PAS_FragB_0012 PE=4 SV=1
Putative uncharacterized protein OS=Komagataella pastoris (strain GS115 / ATCC 20864) GN=PAS_chr1-1_0101 PE=4 SV=1
Putative uncharacterized protein OS=Komagataella pastoris (strain GS115 / ATCC 20864) GN=PAS_chr2-2_0307 PE=4 SV=1
Rho GTPase activating protein (RhoGAP) OS=Komagataella pastoris (strain GS115 / ATCC 20864) GN=PAS_chr2-2_0095 PE=4 SV=1
Component of the GARP (Golgi-associated retrograde protein) complex OS=Komagataella pastoris (strain GS115 / ATCC 20864) GN=PAS_chr1-1_0314 PE=4 SV=1
Uncharacterized protein OS=Komagataella pastoris (strain GS115 / ATCC 20864) GN=PAS_chr4_0129 PE=4 SV=1
Subunit of the heterodimeric FACT complex (Spt16p-Pob3p) OS=Komagataella pastoris (strain GS115 / ATCC 20864) GN=PAS_chr1-1_0018 PE=4 SV=1
Nucleoporin involved in nucleocytoplasmic transport OS=Komagataella pastoris (strain GS115 / ATCC 20864) GN=PAS_chr2-2_0325 PE=4 SV=1
Fimbrin, actin-bundling protein OS=Komagataella pastoris (strain GS115 / ATCC 20864) GN=PAS_chr2-1_0631 PE=4 SV=1
RNA binding protein with preference for single stranded tracts of U~s involved in synthesis of both OS=Komagataella pastoris (strain GS115 / ATCC 20864) GN=PAS_chr3_0065 PE=4 SV=1
60S acidic ribosomal protein P2-A OS=Komagataella pastoris (strain GS115 / ATCC 20864) GN=PAS_chr1-4_0490 PE=3 SV=1
Vacuolar transporter, exports large neutral amino acids from the vacuole OS=Komagataella pastoris (strain GS115 / ATCC 20864) GN=PAS_chr2-2_0343 PE=4 SV=1
N-terminally acetylated protein component of the large (60S) ribosomal subunit, binds to 5.8 S rRNA OS=Komagataella pastoris (strain GS115 / ATCC 20864) GN=PAS_chr4_0208 PE=3 SV=1
Putative uncharacterized protein OS=Komagataella pastoris (strain GS115 / ATCC 20864) GN=PAS_chr1-4_0377 PE=4 SV=1
Uncharacterized protein OS=Komagataella pastoris (strain GS115 / ATCC 20864) GN=PAS_chr4_0257 PE=4 SV=1
Glc7-interacting protein whose overexpression relocalizes Glc7p from the nucleus OS=Komagataella pastoris (strain GS115 / ATCC 20864) GN=PAS_chr1-1_0346 PE=4 SV=1
Protein that interacts with Cdc48p and Npl4p, involved in recognition of polyubiquitinated proteins OS=Komagataella pastoris (strain GS115 / ATCC 20864) GN=PAS_chr1-1_0367 PE=4 SV=1
Protein serine/threonine/tyrosine (Dual-specificity) kinase OS=Komagataella pastoris (strain GS115 / ATCC 20864) GN=PAS_chr4_0812 PE=4 SV=1
Zinc/cadmium resistance protein OS=Komagataella pastoris (strain GS115 / ATCC 20864) GN=PAS_chr4_0896 PE=4 SV=1
Protein component of the small (40S) ribosomal subunit OS=Komagataella pastoris (strain GS115 / ATCC 20864) GN=PAS_chr1-3_0115 PE=3 SV=1
Primary component of eisosomes OS=Komagataella pastoris (strain GS115 / ATCC 20864) GN=PAS_chr3_0227 PE=4 SV=1
Putative uncharacterized protein OS=Komagataella pastoris (strain GS115 / ATCC 20864) GN=PAS_chr1-4_0375 PE=4 SV=1
Sodium/hydrogen exchanger OS=Komagataella pastoris (strain GS115 / ATCC 20864) GN=PAS_chr2-1_0156 PE=3 SV=1
Cytoplasmic ATPase that is a ribosome-associated molecular chaperone OS=Komagataella pastoris (strain GS115 / ATCC 20864) GN=PAS_chr3_0731 PE=3 SV=1
Putative uncharacterized protein OS=Komagataella pastoris (strain GS115 / ATCC 20864) GN=PAS_chr1-4_0693 PE=4 SV=1
Protein kinase involved in bud growth and assembly of the septin ring OS=Komagataella pastoris (strain GS115 / ATCC 20864) GN=PAS_chr1-1_0340 PE=4 SV=1
Protein kinase with similarity to mammalian phosphoinositide-dependent kinase 1 (PDK1) OS=Komagataella pastoris (strain GS115 / ATCC 20864) GN=PAS_chr1-4_0069 PE=4 SV=1
Uncharacterized protein OS=Komagataella pastoris (strain GS115 / ATCC 20864) GN=PAS_chr4_0713 PE=4 SV=1
GTPase-activating protein for the polarity-establishment protein Cdc42p OS=Komagataella pastoris (strain GS115 / ATCC 20864) GN=PAS_chr1-3_0159 PE=4 SV=1
Translation initiation factor eIF-5 OS=Komagataella pastoris (strain GS115 / ATCC 20864) GN=PAS_chr4_0771 PE=4 SV=1
Peroxisome biosynthesis protein PAS1 OS=Komagataella pastoris (strain GS115 / ATCC 20864) GN=PAS_chr3_1045 PE=4 SV=1
Essential phosphoprotein component (P150) of the COPII coat of secretory pathway vesicles OS=Komagataella pastoris (strain GS115 / ATCC 20864) GN=PAS_chr1-4_0231 PE=4 SV=1
Protein that interacts with exonuclease Rat1p and Rai1p OS=Komagataella pastoris (strain GS115 / ATCC 20864) GN=PAS_chr1-4_0159 PE=4 SV=1
Putative uncharacterized protein OS=Komagataella pastoris (strain GS115 / ATCC 20864) GN=PAS_chr1-3_0096 PE=4 SV=1
Phosphatidylserine synthase, functions in phospholipid biosynthesis OS=Komagataella pastoris (strain GS115 / ATCC 20864) GN=PAS_chr1-1_0420 PE=3 SV=1
AMP-activated serine/threonine protein kinase found in a complex containing Snf4p and members of the OS=Komagataella pastoris (strain GS115 / ATCC 20864) GN=PAS_chr2-1_0519 PE=4 SV=1
Coproporphyrinogen III oxidase, an oxygen requiring enzyme OS=Komagataella pastoris (strain GS115 / ATCC 20864) GN=PAS_chr3_0943 PE=4 SV=1
Oxidant-induced cell-cycle arrest protein 5 OS=Komagataella pastoris (strain GS115 / ATCC 20864) GN=OCA5 PE=3 SV=1
Putative uncharacterized protein OS=Komagataella pastoris (strain GS115 / ATCC 20864) GN=PAS_chr2-1_0477 PE=4 SV=1
Aminophospholipid translocase (Flippase) that localizes primarily to the plasma membrane OS=Komagataella pastoris (strain GS115 / ATCC 20864) GN=PAS_chr2-1_0756 PE=4 SV=1
Nucleolar protein required for 60S ribosomal subunit biogenesis OS=Komagataella pastoris (strain GS115 / ATCC 20864) GN=PAS_chr3_1036 PE=4 SV=1
Serine-threonine protein kinase that is part of a glucose-sensing system OS=Komagataella pastoris (strain GS115 / ATCC 20864) GN=PAS_chr2-2_0103 PE=4 SV=1
Serine/threonine protein kinase OS=Komagataella pastoris (strain GS115 / ATCC 20864) GN=PAS_chr3_0195 PE=4 SV=1
Putative uncharacterized protein OS=Komagataella pastoris (strain GS115 / ATCC 20864) GN=PAS_chr3_0161 PE=4 SV=1
Aspartokinase OS=Komagataella pastoris (strain GS115 / ATCC 20864) GN=PAS_chr4_0150 PE=3 SV=1
Low affinity vacuolar membrane localized monovalent cation/H+ antiporter OS=Komagataella pastoris (strain GS115 / ATCC 20864) GN=PAS_chr4_0647 PE=4 SV=1
Protein that induces appearance of [PIN+] prion when overproduced OS=Komagataella pastoris (strain GS115 / ATCC 20864) GN=PAS_chr4_0500 PE=4 SV=1
Vacuolar transporter OS=Komagataella pastoris (strain GS115 / ATCC 20864) GN=PAS_chr3_0295 PE=4 SV=1
Putative transmembrane protein involved in export of ammonia OS=Komagataella pastoris (strain GS115 / ATCC 20864) GN=PAS_chr1-1_0417 PE=4 SV=1
Putative uncharacterized protein OS=Komagataella pastoris (strain GS115 / ATCC 20864) GN=PAS_chr2-1_0664 PE=4 SV=1
Essential helicase component of heterohexameric MCM2-7 complexes OS=Komagataella pastoris (strain GS115 / ATCC 20864) GN=PAS_chr1-4_0142 PE=3 SV=1
Phospho-2-dehydro-3-deoxyheptonate aldolase OS=Komagataella pastoris (strain GS115 / ATCC 20864) GN=PAS_chr1-4_0218 PE=3 SV=1
Uncharacterized protein OS=Komagataella pastoris (strain GS115 / ATCC 20864) GN=PAS_chr4_0633 PE=4 SV=1
Mitochondrial aldehyde dehydrogenase OS=Komagataella pastoris (strain GS115 / ATCC 20864) GN=PAS_chr4_0043 PE=3 SV=1
Choline phosphate cytidylyltransferase OS=Komagataella pastoris (strain GS115 / ATCC 20864) GN=PAS_chr4_0408 PE=4 SV=1
Telobox-containing general regulatory factor OS=Komagataella pastoris (strain GS115 / ATCC 20864) GN=PAS_chr1-4_0281 PE=4 SV=1
Beta subunit of the translation initiation factor eIF2 OS=Komagataella pastoris (strain GS115 / ATCC 20864) GN=PAS_chr1-4_0135 PE=4 SV=1
Putative uncharacterized protein OS=Komagataella pastoris (strain GS115 / ATCC 20864) GN=PAS_chr1-1_0470 PE=4 SV=1
TFIID subunit (67 kDa), involved in RNA polymerase II transcription initiation OS=Komagataella pastoris (strain GS115 / ATCC 20864) GN=PAS_FragD_0016 PE=4 SV=1
Uncharacterized protein OS=Komagataella pastoris (strain GS115 / ATCC 20864) GN=PAS_chr4_0962 PE=4 SV=1
Uncharacterized protein OS=Komagataella pastoris (strain GS115 / ATCC 20864) GN=PAS_chr4_0912 PE=3 SV=1
cAMP-dependent protein kinase regulatory subunit OS=Komagataella pastoris (strain GS115 / ATCC 20864) GN=PAS_chr3_0546 PE=3 SV=1
One of six subunits of the RNA polymerase III transcription initiation factor complex (TFIIIC) OS=Komagataella pastoris (strain GS115 / ATCC 20864) GN=PAS_chr4_0377 PE=4 SV=1
40S ribosomal protein S21 OS=Komagataella pastoris (strain GS115 / ATCC 20864) GN=PAS_chr3_0596 PE=3 SV=1
Protein interacting with poly(A)-binding protein Pab1p OS=Komagataella pastoris (strain GS115 / ATCC 20864) GN=PAS_chr4_0288 PE=4 SV=1
Type II HSP40 co-chaperone that interacts with the HSP70 protein Ssa1p OS=Komagataella pastoris (strain GS115 / ATCC 20864) GN=PAS_chr2-2_0151 PE=4 SV=1
Putative uncharacterized protein OS=Komagataella pastoris (strain GS115 / ATCC 20864) GN=PAS_chr2-1_0819 PE=4 SV=1
Cytosolic L-asparaginase OS=Komagataella pastoris (strain GS115 / ATCC 20864) GN=PAS_chr3_0591 PE=3 SV=1
AdoMet-dependent methyltransferase involved in rRNA processing and 60S ribosomal subunit maturation OS=Komagataella pastoris (strain GS115 / ATCC 20864) GN=PAS_chr4_0464 PE=3 SV=1
Uncharacterized protein OS=Komagataella pastoris (strain GS115 / ATCC 20864) GN=PAS_chr4_0519 PE=4 SV=1
NAD(+)-dependent glutamate dehydrogenase, degrades glutamate to ammonia and alpha-ketoglutarate OS=Komagataella pastoris (strain GS115 / ATCC 20864) GN=PAS_chr2-1_0311 PE=4 SV=1
Nuclear protein involved in asymmetric localization of ASH1 mRNA OS=Komagataella pastoris (strain GS115 / ATCC 20864) GN=PAS_chr1-1_0414 PE=4 SV=1
Fatty acid elongase OS=Komagataella pastoris (strain GS115 / ATCC 20864) GN=PAS_chr3_0602 PE=4 SV=1
Putative serine/threonine protein kinase OS=Komagataella pastoris (strain GS115 / ATCC 20864) GN=PAS_chr2-2_0038 PE=4 SV=1
Putative uncharacterized protein OS=Komagataella pastoris (strain GS115 / ATCC 20864) GN=PAS_chr2-1_0276 PE=4 SV=1
One of five related septins (Cdc3p, Cdc10p, Cdc11p, Cdc12p, Shs1p) OS=Komagataella pastoris (strain GS115 / ATCC 20864) GN=PAS_chr3_0977 PE=3 SV=1
Uncharacterized protein OS=Komagataella pastoris (strain GS115 / ATCC 20864) GN=PAS_chr4_0950 PE=4 SV=1
Vacuolar ATPase V1 domain subunit A containing the catalytic nucleotide binding sites OS=Komagataella pastoris (strain GS115 / ATCC 20864) GN=PAS_chr1-1_0309 PE=3 SV=1
Putative uncharacterized protein OS=Komagataella pastoris (strain GS115 / ATCC 20864) GN=PAS_chr3_1113 PE=4 SV=1
Glyceraldehyde-3-phosphate dehydrogenase OS=Komagataella pastoris (strain GS115 / ATCC 20864) GN=PAS_chr2-1_0437 PE=3 SV=1
Protein with a role in maintenance of cellular integrity OS=Komagataella pastoris (strain GS115 / ATCC 20864) GN=PAS_chr2-2_0414 PE=4 SV=1
Putative magnesium transporter OS=Komagataella pastoris (strain GS115 / ATCC 20864) GN=PAS_chr2-2_0260 PE=4 SV=1
Mitochondrial alcohol dehydrogenase isozyme III OS=Komagataella pastoris (strain GS115 / ATCC 20864) GN=PAS_chr2-1_0472 PE=3 SV=1
Transketolase, similar to Tkl2p OS=Komagataella pastoris (strain GS115 / ATCC 20864) GN=PAS_chr3_0834 PE=4 SV=1
Component of the exomer complex, which also contains Csh6p, Bch1p, Bch2p, and Bud7p OS=Komagataella pastoris (strain GS115 / ATCC 20864) GN=PAS_chr4_0675 PE=4 SV=1
Putative uncharacterized protein OS=Komagataella pastoris (strain GS115 / ATCC 20864) GN=PAS_chr3_1208 PE=4 SV=1
Putative FAD transporter OS=Komagataella pastoris (strain GS115 / ATCC 20864) GN=PAS_chr1-1_0176 PE=4 SV=1
Putative uncharacterized protein OS=Komagataella pastoris (strain GS115 / ATCC 20864) GN=PAS_chr2-1_0645 PE=4 SV=1
Putative uncharacterized protein OS=Komagataella pastoris (strain GS115 / ATCC 20864) GN=PAS_chr3_0952 PE=4 SV=1
Translation initiation factor eIF4G, subunit of the mRNA cap-binding protein complex (EIF4F) OS=Komagataella pastoris (strain GS115 / ATCC 20864) GN=PAS_chr1-1_0053 PE=4 SV=1
RNA binding protein that sequesters CLN3 mRNA in cytoplasmic foci OS=Komagataella pastoris (strain GS115 / ATCC 20864) GN=PAS_chr3_0978 PE=4 SV=1
Carbonic anhydrase OS=Komagataella pastoris (strain GS115 / ATCC 20864) GN=PAS_chr4_0578 PE=3 SV=1
Transcription factor OS=Komagataella pastoris (strain GS115 / ATCC 20864) GN=PAS_chr4_0887 PE=4 SV=1
Membrane protein OS=Komagataella pastoris (strain GS115 / ATCC 20864) GN=PAS_chr3_0930 PE=4 SV=1
NAD(+)-dependent formate dehydrogenase, may protect cells from exogenous formate OS=Komagataella pastoris (strain GS115 / ATCC 20864) GN=PAS_chr3_0932 PE=3 SV=1
Putative uncharacterized protein OS=Komagataella pastoris (strain GS115 / ATCC 20864) GN=PAS_chr3_1206 PE=4 SV=1
Primary component of eisosomes OS=Komagataella pastoris (strain GS115 / ATCC 20864) GN=PAS_chr1-4_0569 PE=4 SV=1
Protein involved in the organization of the actin cytoskeleton OS=Komagataella pastoris (strain GS115 / ATCC 20864) GN=PAS_chr3_0795 PE=4 SV=1
Coronin OS=Komagataella pastoris (strain GS115 / ATCC 20864) GN=PAS_chr2-1_0591 PE=3 SV=1
Actin-binding protein of the cortical actin cytoskeleton OS=Komagataella pastoris (strain GS115 / ATCC 20864) GN=PAS_chr2-2_0320 PE=4 SV=1
RNA polymerase III subunit C37 OS=Komagataella pastoris (strain GS115 / ATCC 20864) GN=PAS_chr4_0031 PE=4 SV=1
Putative vacuolar Fe2+/Mn2+ transporter OS=Komagataella pastoris (strain GS115 / ATCC 20864) GN=PAS_chr3_0372 PE=4 SV=1
Protein involved in regulated synthesis of PtdIns(3,5)P(2) OS=Komagataella pastoris (strain GS115 / ATCC 20864) GN=PAS_chr1-4_0508 PE=4 SV=1
Poly(A) binding protein, part of the 3~-end RNA-processing complex, mediates interactions between th OS=Komagataella pastoris (strain GS115 / ATCC 20864) GN=PAS_chr2-1_0097 PE=4 SV=1
Conserved nuclear RNA-binding protein OS=Komagataella pastoris (strain GS115 / ATCC 20864) GN=PAS_chr1-4_0335 PE=4 SV=1
Putative uncharacterized protein OS=Komagataella pastoris (strain GS115 / ATCC 20864) GN=PAS_chr1-1_0399 PE=4 SV=1
Glucose-repressible protein kinase involved in signal transduction during cell proliferation in resp OS=Komagataella pastoris (strain GS115 / ATCC 20864) GN=PAS_chr3_0148 PE=4 SV=1
Uncharacterized protein OS=Komagataella pastoris (strain GS115 / ATCC 20864) GN=PAS_chr4_0161 PE=4 SV=1
Mitochondrial NAD+ transporter, involved in the transport of NAD+ into the mitochondria (See also YE) OS=Komagataella pastoris (strain GS115 / ATCC 20864) GN=PAS_chr3_0099 PE=3 SV=1
Hsp90 cochaperone, interacts with the Ssa group of the cytosolic Hsp70 chaperones OS=Komagataella pastoris (strain GS115 / ATCC 20864) GN=PAS_chr2-1_0518 PE=4 SV=1
Topoisomerase II-associated deadenylation-dependent mRNA-decapping factor OS=Komagataella pastoris (strain GS115 / ATCC 20864) GN=PAS_chr2-2_0378 PE=4 SV=1
Protein kinase with similarityto serine/threonine protein kinase Ypk1p OS=Komagataella pastoris (strain GS115 / ATCC 20864) GN=PAS_chr3_0127 PE=4 SV=1
Protein involved in bud-site selection and required for axial budding pattern OS=Komagataella pastoris (strain GS115 / ATCC 20864) GN=PAS_chr3_0331 PE=4 SV=1
Nucleotide exchange factor for Gsp1p, localizes to the nucleus OS=Komagataella pastoris (strain GS115 / ATCC 20864) GN=PAS_chr4_0702 PE=4 SV=1
Subunit of the RNA polymerase II mediator complex OS=Komagataella pastoris (strain GS115 / ATCC 20864) GN=PAS_chr3_0152 PE=4 SV=1
Putative uncharacterized protein OS=Komagataella pastoris (strain GS115 / ATCC 20864) GN=PAS_chr3_1240 PE=4 SV=1
Putative uncharacterized protein OS=Komagataella pastoris (strain GS115 / ATCC 20864) GN=PAS_chr3_0717 PE=4 SV=1
Uncharacterized protein OS=Komagataella pastoris (strain GS115 / ATCC 20864) GN=PAS_chr4_0947 PE=4 SV=1
Putative uncharacterized protein OS=Komagataella pastoris (strain GS115 / ATCC 20864) GN=PAS_chr2-2_0321 PE=4 SV=1
5-phospho-ribosyl-1(Alpha)-pyrophosphate synthetase, synthesizes PRPP OS=Komagataella pastoris (strain GS115 / ATCC 20864) GN=PAS_chr2-2_0174 PE=4 SV=1
Putative uncharacterized protein OS=Komagataella pastoris (strain GS115 / ATCC 20864) GN=PAS_chr3_0494 PE=4 SV=1
Forkhead family transcription factor with a major role in the expression of G2/M phase genes OS=Komagataella pastoris (strain GS115 / ATCC 20864) GN=PAS_chr4_0205 PE=4 SV=1
ATP synthase subunit beta OS=Komagataella pastoris (strain GS115 / ATCC 20864) GN=PAS_chr2-2_0165 PE=3 SV=1
Protein component of the large (60S) ribosomal subunit OS=Komagataella pastoris (strain GS115 / ATCC 20864) GN=PAS_chr2-2_0229 PE=4 SV=1
Putative uncharacterized protein OS=Komagataella pastoris (strain GS115 / ATCC 20864) GN=PAS_chr3_1154 PE=4 SV=1
Putative uncharacterized protein OS=Komagataella pastoris (strain GS115 / ATCC 20864) GN=PAS_chr3_0510 PE=4 SV=1
3-phosphoglycerate dehydrogenase, catalyzes the first step in serine and glycine biosynthesis OS=Komagataella pastoris (strain GS115 / ATCC 20864) GN=PAS_chr2-1_0657 PE=3 SV=1
Putative uncharacterized protein OS=Komagataella pastoris (strain GS115 / ATCC 20864) GN=PAS_chr3_1203 PE=4 SV=1
GTP-cyclohydrolase I, catalyzes the first step in the folic acid biosynthetic pathway OS=Komagataella pastoris (strain GS115 / ATCC 20864) GN=PAS_chr1-1_0062 PE=3 SV=1
Key endocytic protein involved in a network of interactions with other endocytic proteins OS=Komagataella pastoris (strain GS115 / ATCC 20864) GN=PAS_chr2-1_0651 PE=4 SV=1
Serine/threonine protein kinase, subunit of the transcription factor TFIIH OS=Komagataella pastoris (strain GS115 / ATCC 20864) GN=PAS_chr2-2_0041 PE=4 SV=1
Alpha 5 subunit of the 20S proteasome involved in ubiquitin-dependent catabolism OS=Komagataella pastoris (strain GS115 / ATCC 20864) GN=PAS_chr3_1129 PE=4 SV=1
Putative uncharacterized protein OS=Komagataella pastoris (strain GS115 / ATCC 20864) GN=PAS_chr3_1086 PE=4 SV=1
Histone acetyltransferase catalytic subunit of the native multisubunit complex (NuA4) OS=Komagataella pastoris (strain GS115 / ATCC 20864) GN=PAS_chr4_0084 PE=4 SV=1
Protein component of the small (40S) ribosomal subunit OS=Komagataella pastoris (strain GS115 / ATCC 20864) GN=PAS_chr1-1_0283 PE=3 SV=1
Glycerol-3-phosphate/dihydroxyacetone phosphate dual substrate-specific sn-1 acyltransferase OS=Komagataella pastoris (strain GS115 / ATCC 20864) GN=PAS_chr1-3_0081 PE=4 SV=1
Transcription factor involved in glucose repression OS=Komagataella pastoris (strain GS115 / ATCC 20864) GN=PAS_chr4_0334 PE=4 SV=1
Putative uncharacterized protein OS=Komagataella pastoris (strain GS115 / ATCC 20864) GN=PAS_FragB_0031 PE=4 SV=1
Translational elongation factor 3, stimulates the binding of aminoacyl-tRNA (AA-tRNA) to ribosomes OS=Komagataella pastoris (strain GS115 / ATCC 20864) GN=PAS_chr4_0038 PE=3 SV=1
Putative nucleolar DEAD box RNA helicase OS=Komagataella pastoris (strain GS115 / ATCC 20864) GN=PAS_chr4_0231 PE=4 SV=1
Poly(A+) RNA-binding protein, involved in the export of mRNAs from the nucleus to the cytoplasm OS=Komagataella pastoris (strain GS115 / ATCC 20864) GN=PAS_chr1-1_0453 PE=4 SV=1
Epsin-like protein involved in endocytosis and actin patch assembly OS=Komagataella pastoris (strain GS115 / ATCC 20864) GN=PAS_chr1-4_0244 PE=4 SV=1
Uncharacterized protein OS=Komagataella pastoris (strain GS115 / ATCC 20864) GN=PAS_chr4_0782 PE=4 SV=1
Putative uncharacterized protein OS=Komagataella pastoris (strain GS115 / ATCC 20864) GN=PAS_c131_0007 PE=4 SV=1
